# Supplementary material for: Discovery of hypothetical hetero-interpenetrated MOFs with arbitrarily dissimilar topologies and unit cell shapes
Source: Royal Society of Chemistry journal article supplement (doi:10.1039/c7ce00290d), 2017-01-01
Supplement: c7ce00290d1.xlsx [file c7ce00290d1.xlsx]

## Sheet: Info
Color Legend
MOFs
	MOF-5 degenerate structures (total: 46)
	PCN-68 degenerate structures
	HKUST-1 degenerate structures
Candidates

## Sheet: MOFs
CCDC REFCODE	Common Name	#Interpenetrations	Formula	Metal	Void Fraction	a	b	c	alpha	beta	gamma	DOI
AXUBAW	IRMOF-18	3	C72H72O26Zn8	Zn	0.615291	18.1115	18.1115	18.1115	60	60	60	http://dx.doi.org/10.1021/ja049408c
BAZGAM	MOF-399	2	C360H216Cu12O48	Cu	0.956878	48.3033	48.3033	48.3033	60	60	60	http://dx.doi.org/10.1021/ic201376t
BIBXOB		1	C96H54N24Ni8O6	Ni	0.844814	22.9539	22.9539	22.9539	60	60	60	http://dx.doi.org/10.1002/anie.201303484
BIWSEG		1	C216H120Cl15Cu36N96	Cu	0.802743	29.03	29.03	29.03	90	90	90	http://dx.doi.org/10.1021/ic701917w
BOHWUS	MOF-808	1	C288H352O512Zr96	Zr	0.686449	35.0765	35.0765	35.0765	90	90	90	http://dx.doi.org/10.1021/ja500330a
BUKRUW		1	C24H12N12O14Zn8	Zn	0.663709	14.2089	14.2089	14.2089	60	60	60	http://dx.doi.org/10.1021/ja5063423
DOMCUE		1	C176Cl96O48Tb8	Tb	0.75047	27.92	27.92	30.6693	62.9235	62.9235	89.9999	http://dx.doi.org/10.1039/b802196a
ECOKAJ		1	C216H96N56O48Zn12	Zn	0.878642	29.497	29.497	29.497	90	90	90	http://dx.doi.org/10.1021/ic051900p
ECOLEP		1	C36H12Co8N48	Co	0.874643	18.64	18.64	18.64	90	90	90	http://dx.doi.org/10.1021/cg2002223
EDUSIF	MOF-5	44	C48H24O26Zn8	Zn	0.791068	18.266	18.266	18.266	60	60	60	http://dx.doi.org/10.1126/science.1067208
EDUVOO		1	C108H48O26Zn8	Zn	0.894135	24.311	24.311	24.311	60	60	60	http://dx.doi.org/10.1126/science.1067208
FOTNIN		1	C192H96N24O80Zr24	Zr	0.929119	39.2929	39.2929	39.2929	60	60	60	http://dx.doi.org/10.1002/anie.201409334
HABQUY	PCN-610	1	C60H30Cu3O15	Cu	0.897162	59.153	59.153	59.153	90	90	90	http://dx.doi.org/10.1002/anie.201001009
HABRAF	PCN-68	3	C432H192Cu24O96	Cu	0.868212	37.2914	37.2914	37.2914	60	60	60	http://dx.doi.org/10.1002/anie.201001009
HANHAH	ZnHKUST-1	1	C72H24O48Zn12	Zn	0.741156	18.7002	18.7002	18.7002	60	60	60	http://dx.doi.org/10.1021/jp2064408
HEXVEM	mesoMOF-1	3	C192H120Cu12N48O48	Cu	0.91978	35.0858	35.0858	35.0858	60	60	60	http://dx.doi.org/10.1021/ja066616r
HIFTOG01	MOF-5	43	C48H24O26Zn8	Zn	0.796443	18.3149	18.3149	18.3149	60.3295	60.3295	60.3295	http://dx.doi.org/10.1021/ja0675447
HOHMEX		1	C160H96Cu8N8O40	Cu	0.858977	27.9999	27.9999	29.5858	61.7579	61.7579	90	http://dx.doi.org/10.1002/chem.200801064
IZEPAF	MIL-hypo-1	1	C288H144Cr36O156	Cr	0.784093	28.52	28.52	28.52	90	90	90	http://dx.doi.org/10.1002/zaac.200400416
JOGRUT		1	C64H48Co4N12O8	Co	0.826706	15.1832	15.3308	24.7499	90	90	111.338	http://dx.doi.org/10.1021/ic800131r
JOZWIG02	NU-1102	3	C216H130N12O32Zr6	Zr	0.792669	25.334	25.334	25.334	90	90	90	http://dx.doi.org/10.1021/ja512973b
JUTCUW		2	C4Cd2N4	Cd	0.513023	8.9364	8.9364	8.9364	60	60	60	http://dx.doi.org/10.1021/ja00052a073
KOZQEX	DUT-75	2	C252H120Cu18N12O72	Cu	0.86899	27.86	27.86	27.86	90	90	90	http://dx.doi.org/10.1039/C4CC07920E
KOZQIB		1	C372H216Cu18N12O72	Cu	0.918525	33.97	33.97	33.97	90	90	90	http://dx.doi.org/10.1039/C4CC07920E
LAWGEW	MOF-5	42	C48H24O26Zn8	Zn	0.796389	18.283	18.283	18.283	60	60	60	http://dx.doi.org/10.1126/science.1113247
LAWGIA	MOF-5	42	C48H24O26Zn8	Zn	0.792002	18.2943	18.2943	18.2943	60	60	60	http://dx.doi.org/10.1126/science.1113247
LAWGOG	MOF-5	42	C48H24O26Zn8	Zn	0.805036	18.3063	18.3063	18.3063	60	60	60	http://dx.doi.org/10.1126/science.1113247
LAWGUM	MOF-5	42	C48H24O26Zn8	Zn	0.793068	18.3127	18.3127	18.3127	60	60	60	http://dx.doi.org/10.1126/science.1113247
LEHXUT		1	C408H216Cu24N24O120	Cu	0.857395	37.1634	37.1634	37.1634	60	60	60	http://dx.doi.org/10.1039/c2cc17593b
LEJBUX		1	C32Cd8	Cd	0.592088	9.003	12.046	18.87	90	96.23	90	http://dx.doi.org/10.1039/C39940000637
LUKLIN		1	C168H72Cu12O48	Cu	0.868197	26.3256	26.3256	26.3256	60	60	60	http://dx.doi.org/10.1021/ic901073w
LUNBIF		1	C12N12S16W12Zn4	W-Zn	0.632729	11.0355	15.693	16.914	90	90	90	http://dx.doi.org/10.1021/cm020103b
LURRIA	NOTT-116 (PCN-68)	11	C432H192Cu24O96	Cu	0.895902	36.5362	36.5362	36.5362	60	60	60	http://dx.doi.org/10.1021/ja1001407
MIBQAR	MOF-5	43	C48H24O26Zn8	Zn	0.797965	18.3083	18.3083	18.3083	60	60	60	http://dx.doi.org/10.1021/jp103212z
MIBQAR01	MOF-5	44	C48H24O26Zn8	Zn	0.791755	18.3017	18.3017	18.3017	60	60	60	http://dx.doi.org/10.1021/jp103212z
MIBQAR02	MOF-5	44	C48H24O26Zn8	Zn	0.802379	18.2965	18.2965	18.2965	60	60	60	http://dx.doi.org/10.1021/jp103212z
MIBQAR03	MOF-5	43	C48H24O26Zn8	Zn	0.804653	18.2888	18.2888	18.2888	60	60	60	http://dx.doi.org/10.1021/jp103212z
MIBQAR04	MOF-5	43	C48H24O26Zn8	Zn	0.802331	18.2861	18.2861	18.2861	60	60	60	http://dx.doi.org/10.1021/jp103212z
MIBQAR05	MOF-5	44	C48H24O26Zn8	Zn	0.80251	18.2789	18.2789	18.2789	60	60	60	http://dx.doi.org/10.1021/jp103212z
MIBQAR06	MOF-5	45	C48H24O26Zn8	Zn	0.799828	18.2751	18.2751	18.2751	60	60	60	http://dx.doi.org/10.1021/jp103212z
MIBQAR07	MOF-5	44	C48H24O26Zn8	Zn	0.80465	18.2704	18.2704	18.2704	60	60	60	http://dx.doi.org/10.1021/jp103212z
MIBQAR08	MOF-5	45	C48H24O26Zn8	Zn	0.79968	18.2662	18.2662	18.2662	60	60	60	http://dx.doi.org/10.1021/jp103212z
MIBQAR10	MOF-5	44	C48H24O26Zn8	Zn	0.808192	18.255	18.255	18.255	60	60	60	http://dx.doi.org/10.1021/jp103212z
MIBQAR11	MOF-5	44	C48H24O26Zn8	Zn	0.805817	18.2507	18.2507	18.2507	60	60	60	http://dx.doi.org/10.1021/jp103212z
MIBQAR12	MOF-5	44	C48H24O26Zn8	Zn	0.800498	18.2455	18.2455	18.2455	60	60	60	http://dx.doi.org/10.1021/jp103212z
MIBQAR13	MOF-5	44	C48H24O26Zn8	Zn	0.801075	18.2422	18.2422	18.2422	60	60	60	http://dx.doi.org/10.1021/jp103212z
MIBQAR14	MOF-5	45	C48H24O26Zn8	Zn	0.809451	18.2359	18.2359	18.2359	60	60	60	http://dx.doi.org/10.1021/jp103212z
MIBQAR15	MOF-5	44	C48H24O26Zn8	Zn	0.805359	18.2344	18.2344	18.2344	60	60	60	http://dx.doi.org/10.1021/jp103212z
MIBQAR16	MOF-5	44	C48H24O26Zn8	Zn	0.806484	18.228	18.228	18.228	60	60	60	http://dx.doi.org/10.1021/jp103212z
MIBQAR18	MOF-5	45	C48H24O26Zn8	Zn	0.803593	18.2205	18.2205	18.2205	60	60	60	http://dx.doi.org/10.1021/jp103212z
MIBQAR19	MOF-5	44	C48H24O26Zn8	Zn	0.816613	18.2115	18.2115	18.2115	60	60	60	http://dx.doi.org/10.1021/jp103212z
MUBZOA		1	C144H70O32Zr6	Zr	0.765356	22.071	22.071	22.071	90	90	90	http://dx.doi.org/10.1002/anie.201406501
MUBZUG		1	C156H70O32Zr6	Zr	0.762447	21.983	21.983	21.983	90	90	90	http://dx.doi.org/10.1002/anie.201406501
NIBHOW		1	C192H96Cu12N24O48	Cu	0.905739	32.9766	32.9766	32.9766	60	60	60	http://dx.doi.org/10.1021/ja067435s
NIBJAK		1	C216H96Cu12N56O48	Cu	0.936748	37.4717	37.4717	37.4717	60	60	60	http://dx.doi.org/10.1021/ja067435s
NIRZAQ	IRMOF-3-AM1	44	C48H24O26Zn8	Zn	0.810522	18.2486	18.2486	18.2486	60	60	60	http://dx.doi.org/10.1021/ja074366o
NODTEH	IRMOF-23terp	44	C48H24O26Zn8	Zn	0.768842	18.0703	18.0703	18.0703	60	60	60	http://dx.doi.org/10.1021/ic500951b
NODTIL	IRMOF-25terPh	34	C48H24O26Zn8	Zn	0.797657	18.0449	18.0449	18.0449	60	60	60	http://dx.doi.org/10.1021/ic500951b
NODTOR	IRMOF-pentane	40	C48H24O26Zn8	Zn	0.767529	18.1499	18.1499	18.1499	90.0009	120	119.999	http://dx.doi.org/10.1021/ic500951b
ODIXEG	PCN-516	1	C56H32O16Si2Zn4	Zn-Si	0.785874	12.706	12.706	23.817	90	90	90	http://dx.doi.org/10.1039/C3CE41105B
PEVPUD	IRMOF-3-AM6XL	46	C48H12O26Zn8	Zn	0.819391	18.2016	18.2016	18.2016	60	60	60	http://dx.doi.org/10.1039/C3CC40635K
PEVQAK	IRMOF-3-AM5XL	46	C48H12O26Zn8	Zn	0.812312	18.126	18.126	18.126	60	60	60	http://dx.doi.org/10.1039/C3CC40635K
PEVQEO	IRMOF-3-AM3XL	44	C48H24O26Zn8	Zn	0.805423	18.0897	18.0897	18.0897	60	60	60	http://dx.doi.org/10.1039/C3CC40635K
PEVQIS	IRMOF-3-AM7XL	2	C192H96O104Zn32	Zn	0.809159	25.654	25.654	25.654	90	90	90	http://dx.doi.org/10.1039/C3CC40635K
PEVQOY	IRMOF-3-AM4XL	2	C192H96O104Zn32	Zn	0.815702	25.543	25.543	25.543	90	90	90	http://dx.doi.org/10.1039/C3CC40635K
PIBNUK		2	C192H96N24O48Zn12	Zn	0.836271	25.6415	25.6415	25.6415	90	90	90	http://dx.doi.org/10.1021/ic0624773
PIBNUK01		1	C192H96N24O48Zn12	Zn	0.839356	25.6349	25.6349	25.6349	90	90	90	http://dx.doi.org/10.1021/ic0624773
PIBPIA		1	C192H96Cd12N24O48		0.833367	26.001	26.001	26.001	90	90	90	http://dx.doi.org/10.1021/ic0624773
PIYZAZ		2	C8Cd2	Cd	0.524758	8.995	8.995	8.995	60	60	60	http://dx.doi.org/10.1002/anie.200704421
QIYDIN	TCM-6	1	C264H120Cu12O48	Cu	0.926255	34.346	34.346	34.346	90	90	90	http://dx.doi.org/10.1002/chem.201304856
QOFLAA		1	C32H16Cu8N16O16	Cu	0.725736	15.7211	15.7211	15.7211	70.1062	71.3706	109.894	http://dx.doi.org/10.1039/C4RA02147A
RONZID		1	C8Cd4N8	Cd	0.56561	9.042	9.042	12.027	90	90	90	http://dx.doi.org/10.1007/BF01029939
RUTNOK	IRMOF-76	2	C69H45N6O13Zn4	Zn	0.883	42.9245	42.9245	42.9245	90	90	90	http://dx.doi.org/10.1021/ja103016y
SAHYIK	MOF-5	44	C48H24O26Zn8	Zn	0.801965	18.1507	18.1507	18.1507	60	60	60	http://dx.doi.org/10.1038/46248
SAHYOQ	MOF-5	45	C48H24O26Zn8	Zn	0.804753	18.3034	18.3034	18.3034	60	60	60	http://dx.doi.org/10.1038/46248
SAHYOQ02	MOF-5	44	C48H24O26Zn8	Zn	0.802728	18.3098	18.3098	18.3098	60	60	60	http://dx.doi.org/10.1038/46248
SAHYOQ03	MOF-5	44	C48H24O26Zn8	Zn	0.788009	18.283	18.283	18.283	60	60	60	http://dx.doi.org/10.1038/46248
SAHYOQ04	MOF-5	44	C48H24O26Zn8	Zn	0.796615	18.3054	18.3054	18.3054	60	60	60	http://dx.doi.org/10.1038/46248
SAHYOQ05	MOF-5	42	C48H24O26Zn8	Zn	0.804204	18.3054	18.3054	18.3054	60	60	60	http://dx.doi.org/10.1038/46248
SEMNIJ	NU-110	2	C624H288Cu24O96	Cu	0.933655	48.5825	48.5825	48.5825	60	60	60	http://dx.doi.org/10.1021/ja3055639
SENWIT		1	C36H12O24Zn8	Zn	0.770232	12.662	14.662	15.434	90	90	90	http://dx.doi.org/10.1021/ic302641v
SUKYIH		1	C58H32Cu4O16	Cu	0.754979	12.248	12.248	22.8767	90	90	90	http://dx.doi.org/10.1002/anie.200904983
TEQPEM	IFMC-28	1	C60H36O26S12Zn8	Zn	0.790144	20.627	20.627	20.627	60	60	60	http://dx.doi.org/10.1039/c2cc36894c
TOVGAO	PCN-228’	3	C216H124N12Ni3O32Zr6	Ni-Zr	0.789158	25.3468	25.3468	25.3468	90	90	90	http://dx.doi.org/10.1021/ja5111317
UCOCUM		1	C72H24Cu12O48	Cu	0.735022	18.6019	18.6019	18.6019	60	60	60	http://dx.doi.org/10.1021/ja203695h
UNIGEE	MOF-5	44	C48H24O26Zn8	Zn	0.797745	18.1424	18.1424	18.1424	60	60	60	http://dx.doi.org/10.1021/ja1074322
UQOFOX	PCN-528	2	C96H56Mn6N40	Mn	0.839272	19.905	20.55	20.55	90	90	90	http://dx.doi.org/10.1021/jacs.5b02999
VAZTOG	MOF-5	44	C48H24O26Zn8	Zn	0.787497	18.3014	18.3014	18.3014	60	60	60	http://dx.doi.org/10.1039/b511941c
VEBHUG	IRMOF-20	2	C48H12O26S12Zn8	Zn	0.890641	29.184	29.184	29.184	90	90	90	http://dx.doi.org/10.1021/ja056639q
VEHJID01		1	C36H12O24Zn8	Zn	0.785903	12.9595	14.7341	15.3571	90	90	90	http://dx.doi.org/10.1007/s10904-013-9859-0
VEHJOJ		1	C108H36O72Zn22	Zn	0.819011	20.573	20.573	20.573	90	90	90	http://dx.doi.org/10.1039/c2ce25343g
VEHJUP		1	C108H36O72Zn22	Zn	0.816202	20.6155	20.6155	20.6155	90	90	90	http://dx.doi.org/10.1039/c2ce25343g
VEJHEZ	MMPF-4	1	C156H60N12O50Zn19	Zn	0.809035	43.03	43.03	43.03	90	90	90	http://dx.doi.org/10.1039/c2sc20330h
VETSUK	POST-65(Co)	1	C576H432Cl12Co26O144	Co	0.756808	35.2288	35.2288	35.2288	60	60	60	http://dx.doi.org/10.1002/chem.201202899
VETTAR	POST-65(Ni)	1	C576H432Cl12Ni26O96	Ni	0.766131	35.1743	35.1743	35.1743	60	60	60	http://dx.doi.org/10.1002/chem.201202899
VUSJUP	MOF-5	43	C30H12O26Zn8	Zn	0.81273	18.101	18.101	18.101	60.0036	60.0036	60.0001	http://dx.doi.org/10.1126/science.1181761
VUSKAW	MOF-5	44	C48H24O26Zn8	Zn	0.802064	18.2519	18.2519	18.252	60.0037	60.0037	60.0005	http://dx.doi.org/10.1126/science.1181761
VUSKEA	MOF-5	44	C48H24O26Zn8	Zn	0.801389	18.2519	18.2519	18.252	60.0037	60.0037	60.0005	http://dx.doi.org/10.1126/science.1181761
WUHCUZ	NU-1103	2	C228H118O32Zr6	Zr	0.837375	27.9293	27.9293	27.9293	90	90	90	http://dx.doi.org/10.1021/ja512973b
WUHDAG	NU-1104	2	C240H130N12O32Zr6	Zr	0.840234	28.9202	28.9202	28.9202	90	90	90	http://dx.doi.org/10.1021/ja512973b
XADDIR	HKUST-1	1	C72H24Cu12O48	Cu	0.737652	18.6626	18.6626	18.6626	60	60	60	http://dx.doi.org/10.1002/ejic.201000331
XAFFUH	DUT-12(Cu)	1	C320H192Cu16N16O64	Cu	0.887055	24.087	36.3295	36.3295	90	90	90	http://dx.doi.org/10.1002/ejic.201000415
XAHPUT		2	C240H128Cu8O40	Cu	0.929497	30.9492	30.9492	45.9136	70.3035	70.3035	89.9999	http://dx.doi.org/10.1038/nchem.738
XAHQAA		1	C224H128Cu8O40	Cu	0.942329	30.7816	30.7816	46.2441	109.44	109.44	90.0002	http://dx.doi.org/10.1038/nchem.738
XAMDUM02	HKUST-1	1	C72H24Cu12O48	Cu	0.759469	18.5896	18.5896	18.5896	60	60	60	http://dx.doi.org/10.1039/c1cc16045a
XAMDUM04	HKUST-1	2	C72H24Cu12O48	Cu	0.737784	18.3471	18.3471	18.3471	60	60	60	http://dx.doi.org/10.1039/c1cc16045a
XIGWUF		1	C12Li6Mo2N12	Li-Mo	0.687161	13.5285	13.5285	14.277	61.7197	61.7197	60	http://dx.doi.org/10.1021/ja0175901
XOGQOB		1	C480H96Cu48O192S96	Cu	0.887443	36.4789	36.4789	36.4789	90	90	90	http://dx.doi.org/10.1021/cg500175k
XUKYEI		1	C52H56Cl4Cu2N8	Cu	0.84139	17.3335	17.3335	23.8297	68.6727	68.6727	89.9999	http://dx.doi.org/10.1080/00958970902818216
XUPGOG	IRMOF-pent-T1, IRMOF-3-(AMPent-TDC)0.67	44	C48H24O26Zn8	Zn	0.778418	18.1065	18.1065	18.1065	60	60	60	http://dx.doi.org/10.1021/ic2017598
YURJUR		1	C84H36Ce3O36S6	Ce	0.756237	17.5757	17.5757	17.5757	90.9296	90.9296	90.9296	http://dx.doi.org/10.1039/B918269C
ZARLEL		1	C264H120O48Zn12	Zn	0.757922	20.269	20.269	39.645	90	90	90	http://dx.doi.org/10.1039/c2cc17357c
ZELROZ		1	C42H24O19Zn4	Zn	0.866846	17.1227	17.1227	17.1227	90	90	90	http://dx.doi.org/10.1039/c2cc35565e

## Sheet: All Candidates
MOF 1	MOF 2	LCM1	LCM2	Distortion (%)	a	b	c	alpha	beta	gamma	# Structures	Energy Density	Rotation	Translation	Group		Colors	Candidate Group
AXUBAW	NODTIL	[1 1 1]	[1 1 1]	1.1072	18.1115	18.1115	18.1115	60	60	60	1	-1.626	[0 0 0]	[20 20 14]	1	1	18	Hetero-interpenetrating candidates
AXUBAW	PEVPUD	[1 1 1]	[1 1 1]	1.485	18.1115	18.1115	18.1115	60	60	60	2	-7.366	[0 180 180]	[27 7 14]	2	2	15	Duplicates of hetero-interpenetrated candidates
AXUBAW	PEVQAK	[1 1 1]	[1 1 1]	0.24	18.1115	18.1115	18.1115	60	60	60	1	-7.226	[0 180 180]	[20 20 14]	2	3	922	Homo-interpenetrated candidates by degenerate pairs
BAZGAM	BAZGAM	[1 1 1]	[1 1 1]	0	48.3033	48.3033	48.3033	60	60	60	5902	-0.42	[0 180 180]	[41 9 8]	4	4	90	Homo-interpenetrated candidates by REFCODE
BAZGAM	SEMNIJ	[1 1 1]	[1 1 1]	1.7241	48.3033	48.3033	48.3033	60	60	60	109	-0.842	[0 0 0]	[49 22 16]	1	Total:	1045
BIBXOB	BIBXOB	[1 1 1]	[1 1 1]	0	22.9539	22.9539	22.9539	60	60	60	9	-5.73	[0 0 0]	[33 21 15]	4
BIWSEG	BIWSEG	[1 1 1]	[1 1 1]	0	29.03	29.03	29.03	90	90	90	650	-0.499	[0 90 90]	[13 1 2]	4
BOHWUS	BOHWUS	[1 1 1]	[1 1 1]	0	35.0765	35.0765	35.0765	90	90	90	4616	-1.169	[0 270 90]	[28 12 26]	4
BUKRUW	BUKRUW	[1 1 1]	[1 1 1]	0	14.2089	14.2089	14.2089	60	60	60	1	-13.431	[0 180 180]	[14 8 4]	4
DOMCUE	DOMCUE	[1 1 1]	[1 1 1]	0	27.92	27.92	30.6693	62.9235	62.9235	89.9999	4	-0.675	[0 0 90]	[29 30 23]	4
ECOKAJ	ECOKAJ	[1 1 1]	[1 1 1]	0	29.497	29.497	29.497	90	90	90	363	-1.584	[0 270 180]	[6 20 9]	4
ECOLEP	ECOLEP	[1 1 1]	[1 1 1]	0	18.64	18.64	18.64	90	90	90	273	-2.497	[0 90 180]	[15 15 13]	4
EDUSIF	EDUSIF	[1 1 1]	[1 1 1]	0	18.266	18.266	18.266	60	60	60	63	-4.527	[0 180 180]	[20 20 13]	4
EDUSIF	LAWGEW	[1 1 1]	[1 1 1]	0.2789	18.266	18.266	18.266	60	60	60	54	-4.581	[0 180 180]	[9 14 2]	3
EDUSIF	LAWGIA	[1 1 1]	[1 1 1]	0.4641	18.266	18.266	18.266	60	60	60	52	-4.572	[0 180 180]	[9 14 2]	3
EDUSIF	LAWGOG	[1 1 1]	[1 1 1]	0.6604	18.266	18.266	18.266	60	60	60	52	-4.563	[0 180 180]	[9 14 2]	3
EDUSIF	LAWGUM	[1 1 1]	[1 1 1]	0.765	18.266	18.266	18.266	60	60	60	52	-4.559	[0 180 180]	[9 14 2]	3
EDUSIF	MIBQAR01	[1 1 1]	[1 1 1]	0.5852	18.266	18.266	18.266	60	60	60	68	-4.629	[0 0 0]	[17 10 5]	3
EDUSIF	MIBQAR02	[1 1 1]	[1 1 1]	0.5001	18.266	18.266	18.266	60	60	60	68	-4.634	[0 0 0]	[17 10 5]	3
EDUSIF	MIBQAR03	[1 1 1]	[1 1 1]	0.374	18.266	18.266	18.266	60	60	60	68	-4.645	[0 0 0]	[17 10 5]	3
EDUSIF	MIBQAR04	[1 1 1]	[1 1 1]	0.3298	18.266	18.266	18.266	60	60	60	68	-4.645	[0 0 0]	[17 10 5]	3
EDUSIF	MIBQAR05	[1 1 1]	[1 1 1]	0.2117	18.266	18.266	18.266	60	60	60	68	-4.653	[0 0 0]	[17 10 5]	3
EDUSIF	MIBQAR06	[1 1 1]	[1 1 1]	0.1494	18.266	18.266	18.266	60	60	60	69	-4.654	[0 0 0]	[17 10 5]	3
EDUSIF	MIBQAR08	[1 1 1]	[1 1 1]	0.0033	18.266	18.266	18.266	60	60	60	69	-4.663	[0 0 0]	[17 10 5]	3
EDUSIF	MIBQAR11	[1 1 1]	[1 1 1]	0.2515	18.266	18.266	18.266	60	60	60	69	-4.673	[0 0 0]	[17 10 5]	3
EDUSIF	MIBQAR12	[1 1 1]	[1 1 1]	0.3371	18.266	18.266	18.266	60	60	60	69	-4.678	[0 0 0]	[17 10 5]	3
EDUSIF	MIBQAR13	[1 1 1]	[1 1 1]	0.3914	18.266	18.266	18.266	60	60	60	69	-4.68	[0 0 0]	[17 10 5]	3
EDUSIF	MIBQAR14	[1 1 1]	[1 1 1]	0.4952	18.266	18.266	18.266	60	60	60	69	-4.684	[0 0 0]	[17 10 5]	3
EDUSIF	MIBQAR15	[1 1 1]	[1 1 1]	0.5199	18.266	18.266	18.266	60	60	60	69	-4.685	[0 0 0]	[17 10 5]	3
EDUSIF	MIBQAR16	[1 1 1]	[1 1 1]	0.6254	18.266	18.266	18.266	60	60	60	69	-4.69	[0 0 0]	[17 10 5]	3
EDUSIF	MIBQAR18	[1 1 1]	[1 1 1]	0.7492	18.266	18.266	18.266	60	60	60	69	-4.695	[0 0 0]	[17 10 5]	3
EDUSIF	NODTIL	[45 45 45]	[46 46 46]	2.9258	821.97	821.97	821.97	60	60	60	114	-4.853	[0 180 180]	[11 15 1]	3
EDUSIF	NODTOR	[1 1 1]	[1 1 1]	1.9198	18.266	18.266	18.266	60	60	60	81	-4.557	[0 180 0]	[35 20 13]	3
EDUSIF	PEVPUD	[1 1 1]	[1 1 1]	1.0614	18.266	18.266	18.266	60	60	60	91	-4.311	[0 0 0]	[9 14 2]	3
EDUSIF	PEVQAK	[1 1 1]	[1 1 1]	2.3171	18.266	18.266	18.266	60	60	60	92	-4.406	[0 180 180]	[20 8 7]	3
EDUSIF	SAHYIK	[1 1 1]	[1 1 1]	1.9057	18.266	18.266	18.266	60	60	60	55	-4.588	[0 180 180]	[21 10 7]	3
EDUSIF	SAHYOQ	[1 1 1]	[1 1 1]	0.613	18.266	18.266	18.266	60	60	60	62	-4.512	[0 180 180]	[20 20 13]	3
EDUSIF	SAHYOQ02	[1 1 1]	[1 1 1]	0.7176	18.266	18.266	18.266	60	60	60	52	-4.562	[0 180 180]	[9 14 2]	3
EDUSIF	SAHYOQ03	[1 1 1]	[1 1 1]	0.2789	18.266	18.266	18.266	60	60	60	48	-4.559	[0 180 180]	[9 14 2]	3
EDUSIF	SAHYOQ04	[1 1 1]	[1 1 1]	0.6457	18.266	18.266	18.266	60	60	60	50	-4.561	[0 180 180]	[9 14 2]	3
EDUSIF	SAHYOQ05	[1 1 1]	[1 1 1]	0.6457	18.266	18.266	18.266	60	60	60	69	-4.568	[0 180 180]	[9 14 2]	3
EDUSIF	UNIGEE	[1 1 1]	[1 1 1]	2.0438	18.266	18.266	18.266	60	60	60	69	-4.713	[0 0 0]	[18 12 5]	3
EDUSIF	VAZTOG	[1 1 1]	[1 1 1]	0.5803	18.266	18.266	18.266	60	60	60	47	-4.559	[0 180 180]	[9 14 2]	3
EDUSIF	VUSJUP	[1 1 1]	[1 1 1]	2.7402	18.266	18.266	18.266	60	60	60	68	-3.116	[0 180 180]	[0 0 0]	3
EDUSIF	VUSKAW	[1 1 1]	[1 1 1]	0.2372	18.266	18.266	18.266	60	60	60	66	-4.557	[0 0 0]	[20 20 13]	3
EDUSIF	VUSKEA	[1 1 1]	[1 1 1]	0.2372	18.266	18.266	18.266	60	60	60	67	-4.562	[0 180 180]	[3 0 0]	3
EDUSIF	XUPGOG	[1 1 1]	[1 1 1]	2.6427	18.266	18.266	18.266	60	60	60	89	-4.694	[0 0 0]	[9 14 2]	3
EDUVOO	EDUVOO	[1 1 1]	[1 1 1]	0	24.311	24.311	24.311	60	60	60	332	-2.545	[0 180 180]	[45 24 19]	4
FOTNIN	FOTNIN	[1 1 1]	[1 1 1]	0	39.2929	39.2929	39.2929	60	60	60	18212	-0.455	[0 0 0]	[56 27 5]	4
HABQUY	VEBHUG	[45 45 45]	[22 22 22]	2.7216	1301.37	1301.37	1301.37	90	90	90	19445	-2.712	[90 180 90]	[58 43 43]	1
HABRAF	HANHAH	[1 1 1]	[2 2 2]	0.8743	37.2914	37.2914	37.2914	60	60	60	29	-8.628	[0 0 0]	[24 14 5]	1
HABRAF	UCOCUM	[1 1 1]	[2 2 2]	0.7064	37.2914	37.2914	37.2914	60	60	60	20	-6.244	[0 0 0]	[24 19 18]	2
HABRAF	XADDIR	[1 1 1]	[2 2 2]	0.2717	37.2914	37.2914	37.2914	60	60	60	21	-6.914	[0 0 0]	[28 12 18]	1
HEXVEM	HEXVEM	[1 1 1]	[1 1 1]	0	35.0858	35.0858	35.0858	60	60	60	1308	-0.895	[0 180 180]	[25 17 19]	4
HIFTOG01	EDUSIF	[1 1 1]	[1 1 1]	1.9924	18.3149	18.3149	18.3149	60.3295	60.3295	60.3295	70	-4.512	[0 0 0]	[0 0 0]	3
HIFTOG01	HIFTOG01	[1 1 1]	[1 1 1]	0	18.3149	18.3149	18.3149	60.3295	60.3295	60.3295	77	-4.46	[0 0 0]	[0 0 0]	4
HIFTOG01	LAWGEW	[50 1 1]	[49 1 1]	1.8093	915.745	18.3149	18.3149	60.3295	60.3295	60.3295	65	-4.528	[0 180 180]	[0 0 0]	3
HIFTOG01	LAWGIA	[48 1 1]	[47 1 1]	1.7087	879.115	18.3149	18.3149	60.3295	60.3295	60.3295	65	-4.512	[0 180 180]	[0 0 0]	3
HIFTOG01	LAWGOG	[47 1 1]	[46 1 1]	1.5567	860.8	18.3149	18.3149	60.3295	60.3295	60.3295	64	-4.496	[0 180 180]	[0 0 0]	3
HIFTOG01	LAWGUM	[46 1 1]	[45 1 1]	1.499	842.485	18.3149	18.3149	60.3295	60.3295	60.3295	63	-4.485	[0 180 180]	[0 0 0]	3
HIFTOG01	MIBQAR	[47 1 1]	[46 1 1]	1.5237	860.8	18.3149	18.3149	60.3295	60.3295	60.3295	61	-4.469	[0 0 0]	[0 0 0]	3
HIFTOG01	MIBQAR01	[47 1 1]	[46 1 1]	1.6325	860.8	18.3149	18.3149	60.3295	60.3295	60.3295	61	-4.471	[0 0 0]	[0 0 0]	3
HIFTOG01	MIBQAR02	[48 1 1]	[47 1 1]	1.6725	879.115	18.3149	18.3149	60.3295	60.3295	60.3295	61	-4.476	[0 0 0]	[0 0 0]	3
HIFTOG01	MIBQAR03	[49 1 1]	[48 1 1]	1.7556	897.43	18.3149	18.3149	60.3295	60.3295	60.3295	61	-4.477	[0 0 0]	[0 0 0]	3
HIFTOG01	MIBQAR04	[49 1 1]	[48 1 1]	1.8002	897.43	18.3149	18.3149	60.3295	60.3295	60.3295	61	-4.483	[0 0 0]	[0 0 0]	3
HIFTOG01	MIBQAR05	[50 1 1]	[49 1 1]	1.877	915.745	18.3149	18.3149	60.3295	60.3295	60.3295	62	-4.488	[0 0 0]	[0 0 0]	3
HIFTOG01	MIBQAR06	[51 1 1]	[50 1 1]	1.8994	934.06	18.3149	18.3149	60.3295	60.3295	60.3295	62	-4.495	[0 0 0]	[0 0 0]	3
HIFTOG01	MIBQAR08	[1 1 1]	[1 1 1]	1.9913	18.3149	18.3149	18.3149	60.3295	60.3295	60.3295	63	-4.503	[0 0 0]	[0 0 0]	3
HIFTOG01	MIBQAR11	[1 1 1]	[1 1 1]	2.0779	18.3149	18.3149	18.3149	60.3295	60.3295	60.3295	64	-4.516	[0 0 0]	[0 0 0]	3
HIFTOG01	MIBQAR12	[1 1 1]	[1 1 1]	2.107	18.3149	18.3149	18.3149	60.3295	60.3295	60.3295	64	-4.518	[0 0 0]	[0 0 0]	3
HIFTOG01	MIBQAR13	[1 1 1]	[1 1 1]	2.1255	18.3149	18.3149	18.3149	60.3295	60.3295	60.3295	64	-4.518	[0 0 0]	[0 0 0]	3
HIFTOG01	MIBQAR14	[1 1 1]	[1 1 1]	2.1608	18.3149	18.3149	18.3149	60.3295	60.3295	60.3295	64	-4.526	[0 0 0]	[0 0 0]	3
HIFTOG01	MIBQAR15	[1 1 1]	[1 1 1]	2.1692	18.3149	18.3149	18.3149	60.3295	60.3295	60.3295	64	-4.527	[0 0 0]	[0 0 0]	3
HIFTOG01	MIBQAR16	[1 1 1]	[1 1 1]	2.2051	18.3149	18.3149	18.3149	60.3295	60.3295	60.3295	64	-4.531	[0 0 0]	[0 0 0]	3
HIFTOG01	MIBQAR18	[1 1 1]	[1 1 1]	2.2471	18.3149	18.3149	18.3149	60.3295	60.3295	60.3295	64	-4.54	[0 0 0]	[0 0 0]	3
HIFTOG01	MIBQAR19	[1 1 1]	[1 1 1]	2.2977	18.3149	18.3149	18.3149	60.3295	60.3295	60.3295	64	-4.547	[0 0 0]	[0 0 0]	3
HIFTOG01	NODTIL	[1 39 34]	[1 40 35]	2.2092	18.3149	714.281	622.707	60.3295	60.3295	60.3295	129	-4.525	[0 0 0]	[20 20 13]	3
HIFTOG01	NODTOR	[1 1 43]	[1 1 44]	2.2983	18.3149	18.3149	787.541	60.3295	60.3295	60.3295	84	-4.354	[0 0 180]	[16 12 9]	3
HIFTOG01	PEVPUD	[1 1 49]	[1 1 50]	2.2965	18.3149	18.3149	897.43	60.3295	60.3295	60.3295	112	-4.483	[0 0 0]	[0 0 0]	3
HIFTOG01	PEVQAK	[1 47 41]	[1 48 42]	2.1358	18.3149	860.8	750.911	60.3295	60.3295	60.3295	107	-4.439	[0 0 0]	[0 0 0]	3
HIFTOG01	SAHYIK	[1 1 43]	[1 1 44]	2.2988	18.3149	18.3149	787.541	60.3295	60.3295	60.3295	56	-4.444	[0 180 180]	[19 10 7]	3
HIFTOG01	SAHYOQ	[47 1 1]	[46 1 1]	1.6045	860.8	18.3149	18.3149	60.3295	60.3295	60.3295	68	-4.494	[0 0 0]	[0 0 0]	3
HIFTOG01	SAHYOQ02	[46 1 1]	[45 1 1]	1.5468	842.485	18.3149	18.3149	60.3295	60.3295	60.3295	64	-4.494	[0 180 180]	[0 0 0]	3
HIFTOG01	SAHYOQ03	[50 1 1]	[49 1 1]	1.8093	915.745	18.3149	18.3149	60.3295	60.3295	60.3295	58	-4.424	[0 180 180]	[9 14 2]	3
HIFTOG01	SAHYOQ04	[47 1 1]	[46 1 1]	1.5715	860.8	18.3149	18.3149	60.3295	60.3295	60.3295	59	-4.429	[0 180 180]	[9 14 2]	3
HIFTOG01	SAHYOQ05	[47 1 1]	[46 1 1]	1.5715	860.8	18.3149	18.3149	60.3295	60.3295	60.3295	84	-4.562	[0 180 180]	[0 0 0]	3
HIFTOG01	UNIGEE	[1 49 42]	[1 50 43]	2.2647	18.3149	897.43	769.226	60.3295	60.3295	60.3295	60	-4.631	[0 0 0]	[0 0 0]	3
HIFTOG01	VAZTOG	[47 1 1]	[46 1 1]	1.6374	860.8	18.3149	18.3149	60.3295	60.3295	60.3295	54	-4.428	[0 180 180]	[9 14 2]	3
HIFTOG01	VUSKAW	[1 1 1]	[1 1 1]	2.0633	18.3149	18.3149	18.3149	60.3295	60.3295	60.3295	74	-4.581	[0 180 180]	[0 0 0]	3
HIFTOG01	VUSKEA	[1 1 1]	[1 1 1]	2.0633	18.3149	18.3149	18.3149	60.3295	60.3295	60.3295	80	-4.562	[0 180 180]	[0 0 0]	3
HIFTOG01	XUPGOG	[1 45 39]	[1 46 40]	2.0276	18.3149	824.17	714.281	60.3295	60.3295	60.3295	111	-4.518	[0 0 0]	[9 14 2]	3
HOHMEX	HOHMEX	[1 1 1]	[1 1 1]	0	27.9999	27.9999	29.5858	61.7579	61.7579	90	108	-2.174	[0 0 90]	[7 5 5]	4
IZEPAF	WUHDAG	[43 43 43]	[42 42 42]	2.8926	1226.36	1226.36	1226.36	90	90	90	56	-2.885	[0 90 90]	[14 24 28]	1
JOGRUT	JOGRUT	[1 1 1]	[1 1 1]	0	15.1832	15.3308	24.7499	90	90	111.338	20	-4.882	[0 0 0]	[4 2 20]	4
JOZWIG02	JOZWIG02	[1 1 1]	[1 1 1]	0	25.334	25.334	25.334	90	90	90	111	-2.887	[90 0 0]	[1 4 12]	4
JUTCUW	JUTCUW	[1 1 1]	[1 1 1]	0	8.9364	8.9364	8.9364	60	60	60	39	-6.648	[0 180 180]	[7 2 1]	4
JUTCUW	PIYZAZ	[1 1 1]	[1 1 1]	1.9544	8.9364	8.9364	8.9364	60	60	60	32	-7.556	[0 180 180]	[11 9 6]	1
KOZQEX	KOZQEX	[1 1 1]	[1 1 1]	0	27.86	27.86	27.86	90	90	90	24	-3.212	[0 90 180]	[14 1 14]	4
KOZQEX	WUHCUZ	[1 1 1]	[1 1 1]	0.7444	27.86	27.86	27.86	90	90	90	55	-2.055	[90 180 270]	[11 15 27]	1
KOZQIB	KOZQIB	[1 1 1]	[1 1 1]	0	33.97	33.97	33.97	90	90	90	4288	-1.049	[0 90 90]	[33 15 15]	4
LAWGEW	LAWGEW	[1 1 1]	[1 1 1]	0	18.283	18.283	18.283	60	60	60	57	-4.607	[0 180 180]	[0 0 0]	4
LAWGEW	MIBQAR01	[1 1 1]	[1 1 1]	0.3065	18.283	18.283	18.283	60	60	60	65	-4.652	[0 0 0]	[0 0 0]	3
LAWGEW	MIBQAR02	[1 1 1]	[1 1 1]	0.2214	18.283	18.283	18.283	60	60	60	65	-4.656	[0 0 0]	[0 0 0]	3
LAWGEW	MIBQAR03	[1 1 1]	[1 1 1]	0.0951	18.283	18.283	18.283	60	60	60	63	-4.654	[0 0 0]	[0 0 0]	3
LAWGEW	MIBQAR04	[1 1 1]	[1 1 1]	0.0509	18.283	18.283	18.283	60	60	60	65	-4.659	[0 0 0]	[0 0 0]	3
LAWGEW	MIBQAR06	[1 1 1]	[1 1 1]	0.1297	18.283	18.283	18.283	60	60	60	66	-4.669	[0 0 0]	[0 0 0]	3
LAWGEW	MIBQAR08	[1 1 1]	[1 1 1]	0.2759	18.283	18.283	18.283	60	60	60	65	-4.676	[0 0 0]	[0 0 0]	3
LAWGEW	MIBQAR14	[1 1 1]	[1 1 1]	0.7748	18.283	18.283	18.283	60	60	60	64	-4.689	[0 0 0]	[0 0 0]	3
LAWGEW	MIBQAR18	[1 1 1]	[1 1 1]	1.0291	18.283	18.283	18.283	60	60	60	64	-4.697	[0 0 0]	[0 0 0]	3
LAWGEW	NODTOR	[1 1 1]	[1 1 1]	2.2008	18.283	18.283	18.283	60	60	60	82	-4.549	[0 180 0]	[35 20 13]	3
LAWGEW	PEVQAK	[1 1 1]	[1 1 1]	2.5985	18.283	18.283	18.283	60	60	60	92	-4.507	[0 0 0]	[0 0 0]	3
LAWGEW	SAHYIK	[1 1 1]	[1 1 1]	2.1867	18.283	18.283	18.283	60	60	60	54	-4.566	[0 180 180]	[20 20 13]	3
LAWGEW	SAHYOQ	[1 1 1]	[1 1 1]	0.3344	18.283	18.283	18.283	60	60	60	64	-4.605	[0 0 0]	[0 0 0]	3
LAWGEW	SAHYOQ02	[1 1 1]	[1 1 1]	0.4391	18.283	18.283	18.283	60	60	60	54	-4.568	[0 180 180]	[0 0 0]	3
LAWGEW	SAHYOQ03	[1 1 1]	[1 1 1]	0	18.283	18.283	18.283	60	60	60	48	-4.514	[0 180 180]	[9 14 2]	3
LAWGEW	SAHYOQ04	[1 1 1]	[1 1 1]	0.3671	18.283	18.283	18.283	60	60	60	50	-4.518	[0 180 180]	[9 14 2]	3
LAWGEW	SAHYOQ05	[1 1 1]	[1 1 1]	0.3671	18.283	18.283	18.283	60	60	60	70	-4.654	[0 180 180]	[0 0 0]	3
LAWGEW	UNIGEE	[1 1 1]	[1 1 1]	2.3249	18.283	18.283	18.283	60	60	60	56	-4.718	[0 0 0]	[0 0 0]	3
LAWGEW	VAZTOG	[1 1 1]	[1 1 1]	0.3016	18.283	18.283	18.283	60	60	60	46	-4.516	[0 180 180]	[9 14 2]	3
LAWGEW	VUSJUP	[50 50 1]	[51 51 1]	2.9392	914.15	914.15	18.283	60	60	60	66	-3.012	[0 0 0]	[17 1 2]	3
LAWGEW	VUSKAW	[1 1 1]	[1 1 1]	0.5166	18.283	18.283	18.283	60	60	60	66	-4.774	[0 180 180]	[0 0 0]	3
LAWGEW	VUSKEA	[1 1 1]	[1 1 1]	0.5166	18.283	18.283	18.283	60	60	60	72	-4.758	[0 180 180]	[0 0 0]	3
LAWGIA	LAWGEW	[1 1 1]	[1 1 1]	0.1854	18.2943	18.2943	18.2943	60	60	60	55	-4.603	[0 180 180]	[0 0 0]	3
LAWGIA	LAWGIA	[1 1 1]	[1 1 1]	0	18.2943	18.2943	18.2943	60	60	60	56	-4.585	[0 180 180]	[0 0 0]	4
LAWGIA	MIBQAR01	[1 1 1]	[1 1 1]	0.1213	18.2943	18.2943	18.2943	60	60	60	64	-4.643	[0 0 0]	[0 0 0]	3
LAWGIA	MIBQAR02	[1 1 1]	[1 1 1]	0.0361	18.2943	18.2943	18.2943	60	60	60	64	-4.646	[0 0 0]	[0 0 0]	3
LAWGIA	MIBQAR03	[1 1 1]	[1 1 1]	0.0902	18.2943	18.2943	18.2943	60	60	60	61	-4.644	[0 0 0]	[0 0 0]	3
LAWGIA	MIBQAR04	[1 1 1]	[1 1 1]	0.1345	18.2943	18.2943	18.2943	60	60	60	62	-4.648	[0 0 0]	[0 0 0]	3
LAWGIA	MIBQAR06	[1 1 1]	[1 1 1]	0.3152	18.2943	18.2943	18.2943	60	60	60	64	-4.658	[0 0 0]	[0 0 0]	3
LAWGIA	MIBQAR08	[1 1 1]	[1 1 1]	0.4615	18.2943	18.2943	18.2943	60	60	60	64	-4.664	[0 0 0]	[0 0 0]	3
LAWGIA	MIBQAR14	[1 1 1]	[1 1 1]	0.9607	18.2943	18.2943	18.2943	60	60	60	63	-4.674	[0 0 0]	[0 0 0]	3
LAWGIA	MIBQAR15	[1 1 1]	[1 1 1]	0.9855	18.2943	18.2943	18.2943	60	60	60	63	-4.675	[0 0 0]	[0 0 0]	3
LAWGIA	MIBQAR18	[1 1 1]	[1 1 1]	1.2151	18.2943	18.2943	18.2943	60	60	60	63	-4.681	[0 0 0]	[0 0 0]	3
LAWGIA	NODTOR	[1 1 1]	[1 1 1]	2.3876	18.2943	18.2943	18.2943	60	60	60	80	-4.533	[0 180 0]	[35 20 13]	3
LAWGIA	PEVPUD	[1 1 1]	[1 1 1]	1.5279	18.2943	18.2943	18.2943	60	60	60	86	-4.55	[0 0 0]	[0 0 0]	3
LAWGIA	PEVQAK	[1 1 1]	[1 1 1]	2.7855	18.2943	18.2943	18.2943	60	60	60	92	-4.487	[0 180 180]	[11 13 0]	3
LAWGIA	SAHYIK	[1 1 1]	[1 1 1]	2.3735	18.2943	18.2943	18.2943	60	60	60	54	-4.55	[0 180 180]	[20 20 13]	3
LAWGIA	SAHYOQ	[1 1 1]	[1 1 1]	0.1492	18.2943	18.2943	18.2943	60	60	60	66	-4.563	[0 0 0]	[0 0 0]	3
LAWGIA	SAHYOQ02	[1 1 1]	[1 1 1]	0.254	18.2943	18.2943	18.2943	60	60	60	55	-4.564	[0 180 180]	[0 0 0]	3
LAWGIA	SAHYOQ03	[1 1 1]	[1 1 1]	0.1854	18.2943	18.2943	18.2943	60	60	60	47	-4.503	[0 180 180]	[0 0 0]	3
LAWGIA	SAHYOQ04	[1 1 1]	[1 1 1]	0.1819	18.2943	18.2943	18.2943	60	60	60	49	-4.504	[0 180 180]	[9 14 2]	3
LAWGIA	SAHYOQ05	[1 1 1]	[1 1 1]	0.1819	18.2943	18.2943	18.2943	60	60	60	68	-4.652	[0 180 180]	[0 0 0]	3
LAWGIA	UNIGEE	[1 1 1]	[1 1 1]	2.5118	18.2943	18.2943	18.2943	60	60	60	55	-4.711	[0 0 0]	[0 0 0]	3
LAWGIA	VAZTOG	[1 1 1]	[1 1 1]	0.1164	18.2943	18.2943	18.2943	60	60	60	44	-4.498	[0 180 180]	[9 14 2]	3
LAWGIA	VUSJUP	[48 48 49]	[49 49 50]	2.9374	878.126	878.126	896.421	60	60	60	67	-3.007	[0 0 0]	[17 1 2]	3
LAWGIA	VUSKAW	[1 1 1]	[1 1 1]	0.7024	18.2943	18.2943	18.2943	60	60	60	67	-4.728	[0 180 180]	[0 0 0]	3
LAWGIA	VUSKEA	[1 1 1]	[1 1 1]	0.7024	18.2943	18.2943	18.2943	60	60	60	71	-4.718	[0 180 180]	[0 0 0]	3
LAWGOG	LAWGEW	[1 1 1]	[1 1 1]	0.3823	18.3063	18.3063	18.3063	60	60	60	55	-4.6	[0 180 180]	[0 0 0]	3
LAWGOG	LAWGIA	[1 1 1]	[1 1 1]	0.1968	18.3063	18.3063	18.3063	60	60	60	52	-4.582	[0 180 180]	[0 0 0]	3
LAWGOG	LAWGOG	[1 1 1]	[1 1 1]	0	18.3063	18.3063	18.3063	60	60	60	53	-4.565	[0 180 180]	[0 0 0]	4
LAWGOG	MIBQAR01	[1 1 1]	[1 1 1]	0.0754	18.3063	18.3063	18.3063	60	60	60	61	-4.633	[0 0 0]	[0 0 0]	3
LAWGOG	MIBQAR02	[1 1 1]	[1 1 1]	0.1607	18.3063	18.3063	18.3063	60	60	60	61	-4.636	[0 0 0]	[0 0 0]	3
LAWGOG	MIBQAR03	[1 1 1]	[1 1 1]	0.2871	18.3063	18.3063	18.3063	60	60	60	61	-4.634	[0 0 0]	[0 0 0]	3
LAWGOG	MIBQAR04	[1 1 1]	[1 1 1]	0.3314	18.3063	18.3063	18.3063	60	60	60	61	-4.637	[0 0 0]	[0 0 0]	3
LAWGOG	MIBQAR06	[1 1 1]	[1 1 1]	0.5122	18.3063	18.3063	18.3063	60	60	60	61	-4.646	[0 0 0]	[0 0 0]	3
LAWGOG	MIBQAR08	[1 1 1]	[1 1 1]	0.6586	18.3063	18.3063	18.3063	60	60	60	61	-4.652	[0 0 0]	[0 0 0]	3
LAWGOG	MIBQAR12	[1 1 1]	[1 1 1]	0.9997	18.3063	18.3063	18.3063	60	60	60	62	-4.655	[0 0 0]	[0 0 0]	3
LAWGOG	MIBQAR14	[1 1 1]	[1 1 1]	1.1582	18.3063	18.3063	18.3063	60	60	60	62	-4.66	[0 0 0]	[0 0 0]	3
LAWGOG	MIBQAR15	[1 1 1]	[1 1 1]	1.1829	18.3063	18.3063	18.3063	60	60	60	62	-4.66	[0 0 0]	[0 0 0]	3
LAWGOG	MIBQAR18	[1 1 1]	[1 1 1]	1.4127	18.3063	18.3063	18.3063	60	60	60	61	-4.666	[0 0 0]	[0 0 0]	3
LAWGOG	NODTOR	[1 1 1]	[1 1 1]	2.5859	18.3063	18.3063	18.3063	60	60	60	80	-4.516	[0 180 0]	[35 20 13]	3
LAWGOG	PEVPUD	[1 1 1]	[1 1 1]	1.7257	18.3063	18.3063	18.3063	60	60	60	84	-4.54	[0 0 0]	[0 0 0]	3
LAWGOG	PEVQAK	[1 1 1]	[1 1 1]	2.9841	18.3063	18.3063	18.3063	60	60	60	90	-4.469	[0 180 180]	[11 13 0]	3
LAWGOG	SAHYIK	[1 1 1]	[1 1 1]	2.5718	18.3063	18.3063	18.3063	60	60	60	53	-4.53	[0 180 180]	[20 20 13]	3
LAWGOG	SAHYOQ	[1 1 1]	[1 1 1]	0.0475	18.3063	18.3063	18.3063	60	60	60	65	-4.52	[0 0 0]	[0 0 0]	3
LAWGOG	SAHYOQ02	[1 1 1]	[1 1 1]	0.0573	18.3063	18.3063	18.3063	60	60	60	53	-4.561	[0 180 180]	[0 0 0]	3
LAWGOG	SAHYOQ03	[1 1 1]	[1 1 1]	0.3823	18.3063	18.3063	18.3063	60	60	60	47	-4.5	[0 180 180]	[0 0 0]	3
LAWGOG	SAHYOQ04	[1 1 1]	[1 1 1]	0.0147	18.3063	18.3063	18.3063	60	60	60	49	-4.489	[0 180 180]	[0 0 0]	3
LAWGOG	SAHYOQ05	[1 1 1]	[1 1 1]	0.0147	18.3063	18.3063	18.3063	60	60	60	67	-4.646	[0 180 180]	[0 0 0]	3
LAWGOG	UNIGEE	[1 1 1]	[1 1 1]	2.7102	18.3063	18.3063	18.3063	60	60	60	56	-4.704	[0 0 0]	[0 0 0]	3
LAWGOG	VAZTOG	[1 1 1]	[1 1 1]	0.0803	18.3063	18.3063	18.3063	60	60	60	43	-4.479	[0 180 180]	[9 14 2]	3
LAWGOG	VUSJUP	[47 47 47]	[48 48 48]	2.9128	860.396	860.396	860.396	60	60	60	65	-3.001	[0 0 0]	[17 1 2]	3
LAWGOG	VUSKAW	[1 1 1]	[1 1 1]	0.8996	18.3063	18.3063	18.3063	60	60	60	68	-4.683	[0 180 180]	[0 0 0]	3
LAWGOG	VUSKEA	[1 1 1]	[1 1 1]	0.8996	18.3063	18.3063	18.3063	60	60	60	71	-4.679	[0 180 180]	[0 0 0]	3
LAWGUM	LAWGEW	[1 1 1]	[1 1 1]	0.4873	18.3127	18.3127	18.3127	60	60	60	54	-4.595	[0 180 180]	[0 0 0]	3
LAWGUM	LAWGIA	[1 1 1]	[1 1 1]	0.3017	18.3127	18.3127	18.3127	60	60	60	53	-4.578	[0 180 180]	[0 0 0]	3
LAWGUM	LAWGOG	[1 1 1]	[1 1 1]	0.1049	18.3127	18.3127	18.3127	60	60	60	52	-4.561	[0 180 180]	[0 0 0]	3
LAWGUM	LAWGUM	[1 1 1]	[1 1 1]	0	18.3127	18.3127	18.3127	60	60	60	51	-4.549	[0 180 180]	[0 0 0]	4
LAWGUM	MIBQAR01	[1 1 1]	[1 1 1]	0.1803	18.3127	18.3127	18.3127	60	60	60	61	-4.626	[0 0 0]	[0 0 0]	3
LAWGUM	MIBQAR02	[1 1 1]	[1 1 1]	0.2656	18.3127	18.3127	18.3127	60	60	60	61	-4.628	[0 0 0]	[0 0 0]	3
LAWGUM	MIBQAR03	[1 1 1]	[1 1 1]	0.392	18.3127	18.3127	18.3127	60	60	60	59	-4.625	[0 0 0]	[0 0 0]	3
LAWGUM	MIBQAR04	[1 1 1]	[1 1 1]	0.4364	18.3127	18.3127	18.3127	60	60	60	60	-4.629	[0 0 0]	[0 0 0]	3
LAWGUM	MIBQAR06	[1 1 1]	[1 1 1]	0.6172	18.3127	18.3127	18.3127	60	60	60	61	-4.637	[0 0 0]	[0 0 0]	3
LAWGUM	MIBQAR08	[1 1 1]	[1 1 1]	0.7637	18.3127	18.3127	18.3127	60	60	60	62	-4.643	[0 0 0]	[0 0 0]	3
LAWGUM	MIBQAR12	[1 1 1]	[1 1 1]	1.1049	18.3127	18.3127	18.3127	60	60	60	61	-4.645	[0 0 0]	[0 0 0]	3
LAWGUM	MIBQAR14	[1 1 1]	[1 1 1]	1.2634	18.3127	18.3127	18.3127	60	60	60	61	-4.65	[0 0 0]	[0 0 0]	3
LAWGUM	MIBQAR15	[1 1 1]	[1 1 1]	1.2882	18.3127	18.3127	18.3127	60	60	60	61	-4.65	[0 0 0]	[0 0 0]	3
LAWGUM	MIBQAR18	[1 1 1]	[1 1 1]	1.5181	18.3127	18.3127	18.3127	60	60	60	61	-4.654	[0 0 0]	[0 0 0]	3
LAWGUM	NODTOR	[1 1 1]	[1 1 1]	2.6917	18.3127	18.3127	18.3127	60	60	60	79	-4.505	[0 180 0]	[35 20 13]	3
LAWGUM	PEVPUD	[1 1 1]	[1 1 1]	1.8312	18.3127	18.3127	18.3127	60	60	60	84	-4.534	[0 0 0]	[0 0 0]	3
LAWGUM	PEVQAK	[49 49 49]	[50 50 50]	2.9718	897.322	897.322	897.322	60	60	60	89	-4.458	[0 180 180]	[11 13 0]	3
LAWGUM	SAHYIK	[1 1 1]	[1 1 1]	2.6776	18.3127	18.3127	18.3127	60	60	60	53	-4.519	[0 180 180]	[20 20 13]	3
LAWGUM	SAHYOQ	[1 1 1]	[1 1 1]	0.1524	18.3127	18.3127	18.3127	60	60	60	64	-4.493	[0 0 0]	[0 0 0]	3
LAWGUM	SAHYOQ02	[1 1 1]	[1 1 1]	0.0475	18.3127	18.3127	18.3127	60	60	60	51	-4.556	[0 180 180]	[0 0 0]	3
LAWGUM	SAHYOQ03	[1 1 1]	[1 1 1]	0.4873	18.3127	18.3127	18.3127	60	60	60	46	-4.49	[0 180 180]	[0 0 0]	3
LAWGUM	SAHYOQ04	[1 1 1]	[1 1 1]	0.1196	18.3127	18.3127	18.3127	60	60	60	47	-4.483	[0 180 180]	[0 0 0]	3
LAWGUM	SAHYOQ05	[1 1 1]	[1 1 1]	0.1196	18.3127	18.3127	18.3127	60	60	60	68	-4.641	[0 180 180]	[0 0 0]	3
LAWGUM	UNIGEE	[1 1 1]	[1 1 1]	2.8161	18.3127	18.3127	18.3127	60	60	60	55	-4.694	[0 0 0]	[0 0 0]	3
LAWGUM	VAZTOG	[1 1 1]	[1 1 1]	0.1852	18.3127	18.3127	18.3127	60	60	60	44	-4.469	[0 180 180]	[9 14 2]	3
LAWGUM	VUSJUP	[46 46 46]	[47 47 47]	2.9435	842.384	842.384	842.384	60	60	60	63	-2.998	[0 0 0]	[17 1 2]	3
LAWGUM	VUSKAW	[1 1 1]	[1 1 1]	1.0048	18.3127	18.3127	18.3127	60	60	60	67	-4.664	[0 180 180]	[3 0 0]	3
LAWGUM	VUSKEA	[1 1 1]	[1 1 1]	1.0048	18.3127	18.3127	18.3127	60	60	60	70	-4.655	[0 180 180]	[0 0 0]	3
LEHXUT	XAMDUM02	[1 1 1]	[2 2 2]	0.1275	37.1634	37.1634	37.1634	60	60	60	109	-4.769	[0 0 0]	[28 31 13]	1
LEJBUX	LEJBUX	[1 1 1]	[1 1 1]	0	9.003	12.046	18.87	90	96.23	90	4	-6.097	[0 0 0]	[2 3 11]	4
LUKLIN	LUKLIN	[1 1 1]	[1 1 1]	0	26.3256	26.3256	26.3256	60	60	60	65	-4.295	[0 180 180]	[33 12 16]	4
LUNBIF	LUNBIF	[1 1 1]	[1 1 1]	0	11.0355	15.693	16.914	90	90	90	2	-0.436	[0 180 0]	[2 5 12]	4
LURRIA	MIBQAR01	[1 1 1]	[2 2 2]	0.5508	36.5362	36.5362	36.5362	60	60	60	254	-4.632	[0 0 0]	[27 26 5]	2
LURRIA	MIBQAR02	[1 1 1]	[2 2 2]	0.4657	36.5362	36.5362	36.5362	60	60	60	257	-4.636	[0 0 0]	[27 26 5]	2
LURRIA	MIBQAR04	[1 1 1]	[2 2 2]	0.2953	36.5362	36.5362	36.5362	60	60	60	256	-4.642	[0 0 0]	[27 26 5]	2
LURRIA	MIBQAR06	[1 1 1]	[2 2 2]	0.1149	36.5362	36.5362	36.5362	60	60	60	263	-4.65	[0 0 0]	[27 26 5]	1
LURRIA	MIBQAR08	[1 1 1]	[2 2 2]	0.0312	36.5362	36.5362	36.5362	60	60	60	266	-4.658	[0 0 0]	[27 26 5]	2
LURRIA	MIBQAR14	[1 1 1]	[2 2 2]	0.5297	36.5362	36.5362	36.5362	60	60	60	267	-4.681	[0 0 0]	[27 26 5]	2
LURRIA	MIBQAR18	[1 1 1]	[2 2 2]	0.7837	36.5362	36.5362	36.5362	60	60	60	266	-4.691	[0 0 0]	[27 26 5]	2
LURRIA	PEVQAK	[1 1 1]	[2 2 2]	2.3519	36.5362	36.5362	36.5362	60	60	60	2897	-7.649	[0 180 180]	[20 10 7]	2
LURRIA	SAHYOQ	[1 1 1]	[2 2 2]	0.5786	36.5362	36.5362	36.5362	60	60	60	247	-4.758	[0 180 180]	[21 20 14]	2
LURRIA	SAHYOQ02	[1 1 1]	[2 2 2]	0.6832	36.5362	36.5362	36.5362	60	60	60	1523	-4.316	[0 180 180]	[18 9 8]	2
LURRIA	SAHYOQ03	[1 1 1]	[2 2 2]	0.2445	36.5362	36.5362	36.5362	60	60	60	1530	-4.336	[0 180 180]	[18 9 8]	2
MIBQAR	EDUSIF	[1 1 1]	[1 1 1]	0.6947	18.3083	18.3083	18.3083	60	60	60	62	-4.498	[0 180 180]	[11 6 14]	3
MIBQAR	LAWGEW	[1 1 1]	[1 1 1]	0.4151	18.3083	18.3083	18.3083	60	60	60	50	-4.517	[0 180 180]	[9 14 2]	3
MIBQAR	LAWGIA	[1 1 1]	[1 1 1]	0.2296	18.3083	18.3083	18.3083	60	60	60	50	-4.508	[0 180 180]	[9 14 2]	3
MIBQAR	LAWGOG	[1 1 1]	[1 1 1]	0.0328	18.3083	18.3083	18.3083	60	60	60	50	-4.499	[0 180 180]	[9 14 2]	3
MIBQAR	LAWGUM	[1 1 1]	[1 1 1]	0.0721	18.3083	18.3083	18.3083	60	60	60	49	-4.494	[0 180 180]	[9 14 2]	3
MIBQAR	MIBQAR	[1 1 1]	[1 1 1]	0	18.3083	18.3083	18.3083	60	60	60	65	-4.599	[0 0 0]	[17 10 5]	4
MIBQAR	MIBQAR01	[1 1 1]	[1 1 1]	0.1082	18.3083	18.3083	18.3083	60	60	60	64	-4.6	[0 0 0]	[17 10 5]	3
MIBQAR	MIBQAR02	[1 1 1]	[1 1 1]	0.1935	18.3083	18.3083	18.3083	60	60	60	64	-4.603	[0 0 0]	[17 10 5]	3
MIBQAR	MIBQAR03	[1 1 1]	[1 1 1]	0.3199	18.3083	18.3083	18.3083	60	60	60	64	-4.612	[0 0 0]	[17 10 5]	3
MIBQAR	MIBQAR04	[1 1 1]	[1 1 1]	0.3642	18.3083	18.3083	18.3083	60	60	60	64	-4.61	[0 0 0]	[17 10 5]	3
MIBQAR	MIBQAR05	[1 1 1]	[1 1 1]	0.4825	18.3083	18.3083	18.3083	60	60	60	64	-4.615	[0 0 0]	[17 10 5]	3
MIBQAR	MIBQAR06	[1 1 1]	[1 1 1]	0.545	18.3083	18.3083	18.3083	60	60	60	64	-4.616	[0 0 0]	[17 10 5]	3
MIBQAR	MIBQAR08	[1 1 1]	[1 1 1]	0.6914	18.3083	18.3083	18.3083	60	60	60	65	-4.622	[0 0 0]	[17 10 5]	3
MIBQAR	MIBQAR11	[1 1 1]	[1 1 1]	0.9468	18.3083	18.3083	18.3083	60	60	60	65	-4.632	[0 0 0]	[17 10 5]	3
MIBQAR	MIBQAR12	[1 1 1]	[1 1 1]	1.0326	18.3083	18.3083	18.3083	60	60	60	65	-4.636	[0 0 0]	[17 10 5]	3
MIBQAR	MIBQAR13	[1 1 1]	[1 1 1]	1.087	18.3083	18.3083	18.3083	60	60	60	64	-4.638	[0 0 0]	[17 10 5]	3
MIBQAR	MIBQAR14	[1 1 1]	[1 1 1]	1.1911	18.3083	18.3083	18.3083	60	60	60	64	-4.642	[0 0 0]	[17 10 5]	3
MIBQAR	MIBQAR15	[1 1 1]	[1 1 1]	1.2158	18.3083	18.3083	18.3083	60	60	60	64	-4.643	[0 0 0]	[17 10 5]	3
MIBQAR	MIBQAR16	[1 1 1]	[1 1 1]	1.3216	18.3083	18.3083	18.3083	60	60	60	63	-4.645	[0 0 0]	[17 10 5]	3
MIBQAR	MIBQAR18	[1 1 1]	[1 1 1]	1.4456	18.3083	18.3083	18.3083	60	60	60	63	-4.65	[0 0 0]	[17 10 5]	3
MIBQAR	NODTOR	[1 1 1]	[1 1 1]	2.619	18.3083	18.3083	18.3083	60	60	60	77	-4.48	[0 180 0]	[35 20 13]	3
MIBQAR	PEVPUD	[1 1 1]	[1 1 1]	1.7586	18.3083	18.3083	18.3083	60	60	60	91	-4.256	[0 0 0]	[9 14 2]	3
MIBQAR	PEVQAK	[50 50 50]	[51 51 51]	2.9243	915.415	915.415	915.415	60	60	60	95	-4.356	[0 180 180]	[20 8 7]	3
MIBQAR	SAHYIK	[1 1 1]	[1 1 1]	2.6049	18.3083	18.3083	18.3083	60	60	60	56	-4.535	[0 180 180]	[11 6 14]	3
MIBQAR	SAHYOQ	[1 1 1]	[1 1 1]	0.0803	18.3083	18.3083	18.3083	60	60	60	62	-4.483	[0 180 180]	[11 6 14]	3
MIBQAR	SAHYOQ02	[1 1 1]	[1 1 1]	0.0246	18.3083	18.3083	18.3083	60	60	60	50	-4.499	[0 180 180]	[9 14 2]	3
MIBQAR	SAHYOQ03	[1 1 1]	[1 1 1]	0.4151	18.3083	18.3083	18.3083	60	60	60	48	-4.491	[0 180 180]	[9 14 2]	3
MIBQAR	SAHYOQ04	[1 1 1]	[1 1 1]	0.0475	18.3083	18.3083	18.3083	60	60	60	48	-4.495	[0 180 180]	[9 14 2]	3
MIBQAR	SAHYOQ05	[1 1 1]	[1 1 1]	0.0475	18.3083	18.3083	18.3083	60	60	60	69	-4.5	[0 180 180]	[9 14 2]	3
MIBQAR	UNIGEE	[1 1 1]	[1 1 1]	2.7433	18.3083	18.3083	18.3083	60	60	60	69	-4.65	[0 180 180]	[17 10 9]	3
MIBQAR	VAZTOG	[1 1 1]	[1 1 1]	0.1131	18.3083	18.3083	18.3083	60	60	60	45	-4.493	[0 180 180]	[9 14 2]	3
MIBQAR	VUSJUP	[47 47 47]	[48 48 48]	2.8804	860.49	860.49	860.49	60	60	60	63	-3.091	[0 180 180]	[0 0 0]	3
MIBQAR	VUSKAW	[1 1 1]	[1 1 1]	0.9325	18.3083	18.3083	18.3083	60	60	60	64	-4.479	[0 0 0]	[20 20 13]	3
MIBQAR	VUSKEA	[1 1 1]	[1 1 1]	0.9325	18.3083	18.3083	18.3083	60	60	60	67	-4.506	[0 180 180]	[3 0 0]	3
MIBQAR	XUPGOG	[47 47 47]	[48 48 48]	2.9761	860.49	860.49	860.49	60	60	60	93	-4.632	[0 0 0]	[9 14 2]	3
MIBQAR01	MIBQAR01	[1 1 1]	[1 1 1]	0	18.3017	18.3017	18.3017	60	60	60	66	-4.606	[0 0 0]	[17 10 5]	4
MIBQAR01	MIBQAR02	[1 1 1]	[1 1 1]	0.0853	18.3017	18.3017	18.3017	60	60	60	66	-4.609	[0 0 0]	[17 10 5]	3
MIBQAR01	MIBQAR04	[1 1 1]	[1 1 1]	0.2559	18.3017	18.3017	18.3017	60	60	60	64	-4.616	[0 0 0]	[17 10 5]	3
MIBQAR01	MIBQAR08	[1 1 1]	[1 1 1]	0.583	18.3017	18.3017	18.3017	60	60	60	65	-4.628	[0 0 0]	[17 10 5]	3
MIBQAR01	MIBQAR14	[1 1 1]	[1 1 1]	1.0825	18.3017	18.3017	18.3017	60	60	60	65	-4.649	[0 0 0]	[17 10 5]	3
MIBQAR01	NODTOR	[1 1 1]	[1 1 1]	2.5099	18.3017	18.3017	18.3017	60	60	60	78	-4.494	[0 180 0]	[35 20 13]	3
MIBQAR01	PEVQAK	[1 1 1]	[1 1 1]	2.908	18.3017	18.3017	18.3017	60	60	60	95	-4.361	[0 180 180]	[20 8 7]	3
MIBQAR01	SAHYOQ	[1 1 1]	[1 1 1]	0.0279	18.3017	18.3017	18.3017	60	60	60	63	-4.487	[0 180 180]	[11 6 14]	3
MIBQAR01	SAHYOQ02	[1 1 1]	[1 1 1]	0.1327	18.3017	18.3017	18.3017	60	60	60	51	-4.506	[0 180 180]	[9 14 2]	3
MIBQAR01	SAHYOQ03	[1 1 1]	[1 1 1]	0.3068	18.3017	18.3017	18.3017	60	60	60	48	-4.5	[0 180 180]	[9 14 2]	3
MIBQAR01	SAHYOQ05	[1 1 1]	[1 1 1]	0.0606	18.3017	18.3017	18.3017	60	60	60	70	-4.508	[0 180 180]	[9 14 2]	3
MIBQAR01	UNIGEE	[1 1 1]	[1 1 1]	2.6342	18.3017	18.3017	18.3017	60	60	60	69	-4.656	[0 180 180]	[17 10 9]	3
MIBQAR01	VUSKAW	[1 1 1]	[1 1 1]	0.824	18.3017	18.3017	18.3017	60	60	60	67	-4.49	[0 0 0]	[20 20 13]	3
MIBQAR01	XUPGOG	[48 48 48]	[49 49 49]	2.9543	878.482	878.482	878.482	60	60	60	94	-4.639	[0 0 0]	[9 14 2]	3
MIBQAR02	MIBQAR02	[1 1 1]	[1 1 1]	0	18.2965	18.2965	18.2965	60	60	60	67	-4.614	[0 0 0]	[17 10 5]	4
MIBQAR02	MIBQAR04	[1 1 1]	[1 1 1]	0.1706	18.2965	18.2965	18.2965	60	60	60	66	-4.621	[0 0 0]	[17 10 5]	3
MIBQAR02	MIBQAR08	[1 1 1]	[1 1 1]	0.4976	18.2965	18.2965	18.2965	60	60	60	67	-4.633	[0 0 0]	[17 10 5]	3
MIBQAR02	MIBQAR14	[1 1 1]	[1 1 1]	0.9969	18.2965	18.2965	18.2965	60	60	60	64	-4.654	[0 0 0]	[17 10 5]	3
MIBQAR02	NODTOR	[1 1 1]	[1 1 1]	2.4239	18.2965	18.2965	18.2965	60	60	60	78	-4.505	[0 180 0]	[35 20 13]	3
MIBQAR02	PEVQAK	[1 1 1]	[1 1 1]	2.8219	18.2965	18.2965	18.2965	60	60	60	94	-4.367	[0 180 180]	[20 8 7]	3
MIBQAR02	SAHYOQ	[1 1 1]	[1 1 1]	0.1131	18.2965	18.2965	18.2965	60	60	60	63	-4.49	[0 180 180]	[11 6 14]	3
MIBQAR02	SAHYOQ02	[1 1 1]	[1 1 1]	0.2179	18.2965	18.2965	18.2965	60	60	60	49	-4.514	[0 180 180]	[9 14 2]	3
MIBQAR02	SAHYOQ03	[1 1 1]	[1 1 1]	0.2215	18.2965	18.2965	18.2965	60	60	60	48	-4.508	[0 180 180]	[9 14 2]	3
MIBQAR02	SAHYOQ05	[1 1 1]	[1 1 1]	0.1459	18.2965	18.2965	18.2965	60	60	60	70	-4.515	[0 180 180]	[9 14 2]	3
MIBQAR02	UNIGEE	[1 1 1]	[1 1 1]	2.5482	18.2965	18.2965	18.2965	60	60	60	70	-4.663	[0 180 180]	[17 10 9]	3
MIBQAR02	VUSKAW	[1 1 1]	[1 1 1]	0.7385	18.2965	18.2965	18.2965	60	60	60	67	-4.501	[0 0 0]	[20 20 13]	3
MIBQAR02	XUPGOG	[49 49 49]	[50 50 50]	2.9149	896.529	896.529	896.529	60	60	60	94	-4.646	[0 0 0]	[9 14 2]	3
MIBQAR03	MIBQAR01	[1 1 1]	[1 1 1]	0.2115	18.2888	18.2888	18.2888	60	60	60	67	-4.608	[0 0 0]	[17 10 5]	3
MIBQAR03	MIBQAR02	[1 1 1]	[1 1 1]	0.1263	18.2888	18.2888	18.2888	60	60	60	67	-4.613	[0 0 0]	[17 10 5]	3
MIBQAR03	MIBQAR03	[1 1 1]	[1 1 1]	0	18.2888	18.2888	18.2888	60	60	60	67	-4.624	[0 0 0]	[17 10 5]	4
MIBQAR03	MIBQAR04	[1 1 1]	[1 1 1]	0.0443	18.2888	18.2888	18.2888	60	60	60	67	-4.623	[0 0 0]	[17 10 5]	3
MIBQAR03	MIBQAR06	[1 1 1]	[1 1 1]	0.2249	18.2888	18.2888	18.2888	60	60	60	67	-4.629	[0 0 0]	[17 10 5]	3
MIBQAR03	MIBQAR08	[1 1 1]	[1 1 1]	0.3712	18.2888	18.2888	18.2888	60	60	60	67	-4.634	[0 0 0]	[17 10 5]	3
MIBQAR03	MIBQAR14	[1 1 1]	[1 1 1]	0.8703	18.2888	18.2888	18.2888	60	60	60	66	-4.655	[0 0 0]	[17 10 5]	3
MIBQAR03	MIBQAR18	[1 1 1]	[1 1 1]	1.1246	18.2888	18.2888	18.2888	60	60	60	65	-4.666	[0 0 0]	[17 10 5]	3
MIBQAR03	NODTOR	[1 1 1]	[1 1 1]	2.2966	18.2888	18.2888	18.2888	60	60	60	78	-4.514	[0 180 0]	[35 20 13]	3
MIBQAR03	PEVQAK	[1 1 1]	[1 1 1]	2.6945	18.2888	18.2888	18.2888	60	60	60	93	-4.372	[0 180 180]	[20 8 7]	3
MIBQAR03	SAHYOQ	[1 1 1]	[1 1 1]	0.2393	18.2888	18.2888	18.2888	60	60	60	61	-4.473	[0 180 180]	[11 6 14]	3
MIBQAR03	SAHYOQ02	[1 1 1]	[1 1 1]	0.3441	18.2888	18.2888	18.2888	60	60	60	51	-4.524	[0 180 180]	[9 14 2]	3
MIBQAR03	SAHYOQ03	[1 1 1]	[1 1 1]	0.0952	18.2888	18.2888	18.2888	60	60	60	47	-4.518	[0 180 180]	[9 14 2]	3
MIBQAR03	SAHYOQ04	[1 1 1]	[1 1 1]	0.2721	18.2888	18.2888	18.2888	60	60	60	48	-4.521	[0 180 180]	[9 14 2]	3
MIBQAR03	SAHYOQ05	[1 1 1]	[1 1 1]	0.2721	18.2888	18.2888	18.2888	60	60	60	70	-4.527	[0 180 180]	[9 14 2]	3
MIBQAR03	UNIGEE	[1 1 1]	[1 1 1]	2.4208	18.2888	18.2888	18.2888	60	60	60	70	-4.67	[0 180 180]	[17 10 9]	3
MIBQAR03	VUSJUP	[49 49 49]	[50 50 50]	2.9443	896.151	896.151	896.151	60	60	60	65	-3.104	[0 180 180]	[0 0 0]	3
MIBQAR03	VUSKAW	[1 1 1]	[1 1 1]	0.6119	18.2888	18.2888	18.2888	60	60	60	66	-4.515	[0 0 0]	[20 20 13]	3
MIBQAR03	VUSKEA	[1 1 1]	[1 1 1]	0.6119	18.2888	18.2888	18.2888	60	60	60	67	-4.536	[0 180 180]	[3 0 0]	3
MIBQAR03	XUPGOG	[50 50 50]	[51 51 51]	2.9211	914.44	914.44	914.44	60	60	60	94	-4.653	[0 0 0]	[9 14 2]	3
MIBQAR04	MIBQAR04	[1 1 1]	[1 1 1]	0	18.2861	18.2861	18.2861	60	60	60	68	-4.625	[0 0 0]	[17 10 5]	4
MIBQAR04	PEVQAK	[1 1 1]	[1 1 1]	2.6498	18.2861	18.2861	18.2861	60	60	60	93	-4.374	[0 180 180]	[20 8 7]	3
MIBQAR04	SAHYOQ02	[1 1 1]	[1 1 1]	0.3883	18.2861	18.2861	18.2861	60	60	60	51	-4.527	[0 180 180]	[9 14 2]	3
MIBQAR05	LAWGEW	[1 1 1]	[1 1 1]	0.0673	18.2789	18.2789	18.2789	60	60	60	53	-4.555	[0 180 180]	[9 14 2]	3
MIBQAR05	LAWGIA	[1 1 1]	[1 1 1]	0.2525	18.2789	18.2789	18.2789	60	60	60	54	-4.547	[0 180 180]	[9 14 2]	3
MIBQAR05	LAWGOG	[1 1 1]	[1 1 1]	0.449	18.2789	18.2789	18.2789	60	60	60	52	-4.538	[0 180 180]	[9 14 2]	3
MIBQAR05	LAWGUM	[1 1 1]	[1 1 1]	0.5537	18.2789	18.2789	18.2789	60	60	60	52	-4.534	[0 180 180]	[9 14 2]	3
MIBQAR05	MIBQAR01	[1 1 1]	[1 1 1]	0.3737	18.2789	18.2789	18.2789	60	60	60	69	-4.614	[0 0 0]	[17 10 5]	3
MIBQAR05	MIBQAR02	[1 1 1]	[1 1 1]	0.2886	18.2789	18.2789	18.2789	60	60	60	69	-4.619	[0 0 0]	[17 10 5]	3
MIBQAR05	MIBQAR03	[1 1 1]	[1 1 1]	0.1624	18.2789	18.2789	18.2789	60	60	60	68	-4.63	[0 0 0]	[17 10 5]	3
MIBQAR05	MIBQAR04	[1 1 1]	[1 1 1]	0.1181	18.2789	18.2789	18.2789	60	60	60	69	-4.63	[0 0 0]	[17 10 5]	3
MIBQAR05	MIBQAR05	[1 1 1]	[1 1 1]	0	18.2789	18.2789	18.2789	60	60	60	69	-4.638	[0 0 0]	[17 10 5]	4
MIBQAR05	MIBQAR06	[1 1 1]	[1 1 1]	0.0624	18.2789	18.2789	18.2789	60	60	60	69	-4.638	[0 0 0]	[17 10 5]	3
MIBQAR05	MIBQAR08	[1 1 1]	[1 1 1]	0.2086	18.2789	18.2789	18.2789	60	60	60	69	-4.644	[0 0 0]	[17 10 5]	3
MIBQAR05	MIBQAR11	[1 1 1]	[1 1 1]	0.4635	18.2789	18.2789	18.2789	60	60	60	69	-4.655	[0 0 0]	[17 10 5]	3
MIBQAR05	MIBQAR12	[1 1 1]	[1 1 1]	0.5492	18.2789	18.2789	18.2789	60	60	60	69	-4.659	[0 0 0]	[17 10 5]	3
MIBQAR05	MIBQAR14	[1 1 1]	[1 1 1]	0.7074	18.2789	18.2789	18.2789	60	60	60	68	-4.666	[0 0 0]	[17 10 5]	3
MIBQAR05	MIBQAR15	[1 1 1]	[1 1 1]	0.7321	18.2789	18.2789	18.2789	60	60	60	68	-4.666	[0 0 0]	[17 10 5]	3
MIBQAR05	MIBQAR16	[1 1 1]	[1 1 1]	0.8377	18.2789	18.2789	18.2789	60	60	60	68	-4.672	[0 0 0]	[17 10 5]	3
MIBQAR05	MIBQAR18	[1 1 1]	[1 1 1]	0.9616	18.2789	18.2789	18.2789	60	60	60	68	-4.676	[0 0 0]	[17 10 5]	3
MIBQAR05	NODTIL	[44 44 44]	[45 45 45]	2.8628	804.272	804.272	804.272	60	60	60	117	-4.836	[0 180 180]	[11 15 1]	3
MIBQAR05	NODTOR	[1 1 1]	[1 1 1]	2.133	18.2789	18.2789	18.2789	60	60	60	81	-4.535	[0 180 0]	[35 20 13]	3
MIBQAR05	PEVPUD	[1 1 1]	[1 1 1]	1.2741	18.2789	18.2789	18.2789	60	60	60	92	-4.284	[0 0 0]	[9 14 2]	3
MIBQAR05	PEVQAK	[1 1 1]	[1 1 1]	2.5306	18.2789	18.2789	18.2789	60	60	60	92	-4.383	[0 180 180]	[20 8 7]	3
MIBQAR05	SAHYIK	[1 1 1]	[1 1 1]	2.1189	18.2789	18.2789	18.2789	60	60	60	55	-4.574	[0 180 180]	[11 6 14]	3
MIBQAR05	SAHYOQ	[1 1 1]	[1 1 1]	0.4016	18.2789	18.2789	18.2789	60	60	60	63	-4.487	[0 180 180]	[11 6 14]	3
MIBQAR05	SAHYOQ02	[1 1 1]	[1 1 1]	0.5063	18.2789	18.2789	18.2789	60	60	60	52	-4.537	[0 180 180]	[9 14 2]	3
MIBQAR05	SAHYOQ03	[1 1 1]	[1 1 1]	0.0673	18.2789	18.2789	18.2789	60	60	60	48	-4.533	[0 180 180]	[9 14 2]	3
MIBQAR05	SAHYOQ04	[1 1 1]	[1 1 1]	0.4343	18.2789	18.2789	18.2789	60	60	60	50	-4.535	[0 180 180]	[9 14 2]	3
MIBQAR05	SAHYOQ05	[1 1 1]	[1 1 1]	0.4343	18.2789	18.2789	18.2789	60	60	60	69	-4.539	[0 180 180]	[9 14 2]	3
MIBQAR05	UNIGEE	[1 1 1]	[1 1 1]	2.2571	18.2789	18.2789	18.2789	60	60	60	71	-4.683	[0 180 180]	[17 10 9]	3
MIBQAR05	VAZTOG	[1 1 1]	[1 1 1]	0.3688	18.2789	18.2789	18.2789	60	60	60	48	-4.534	[0 180 180]	[9 14 2]	3
MIBQAR05	VUSJUP	[1 1 1]	[1 1 1]	2.954	18.2789	18.2789	18.2789	60	60	60	68	-3.118	[0 180 180]	[0 0 0]	3
MIBQAR05	VUSKAW	[1 1 1]	[1 1 1]	0.4492	18.2789	18.2789	18.2789	60	60	60	67	-4.532	[0 0 0]	[20 20 13]	3
MIBQAR05	VUSKEA	[1 1 1]	[1 1 1]	0.4492	18.2789	18.2789	18.2789	60	60	60	68	-4.563	[0 180 180]	[3 0 0]	3
MIBQAR05	XUPGOG	[1 1 1]	[1 1 1]	2.8564	18.2789	18.2789	18.2789	60	60	60	95	-4.669	[0 0 0]	[9 14 2]	3
MIBQAR06	MIBQAR01	[1 1 1]	[1 1 1]	0.436	18.2751	18.2751	18.2751	60	60	60	69	-4.616	[0 0 0]	[17 10 5]	3
MIBQAR06	MIBQAR02	[1 1 1]	[1 1 1]	0.3509	18.2751	18.2751	18.2751	60	60	60	69	-4.622	[0 0 0]	[17 10 5]	3
MIBQAR06	MIBQAR04	[1 1 1]	[1 1 1]	0.1805	18.2751	18.2751	18.2751	60	60	60	69	-4.632	[0 0 0]	[17 10 5]	3
MIBQAR06	MIBQAR06	[1 1 1]	[1 1 1]	0	18.2751	18.2751	18.2751	60	60	60	69	-4.642	[0 0 0]	[17 10 5]	4
MIBQAR06	MIBQAR08	[1 1 1]	[1 1 1]	0.1462	18.2751	18.2751	18.2751	60	60	60	70	-4.648	[0 0 0]	[17 10 5]	3
MIBQAR06	MIBQAR14	[1 1 1]	[1 1 1]	0.6449	18.2751	18.2751	18.2751	60	60	60	69	-4.67	[0 0 0]	[17 10 5]	3
MIBQAR06	MIBQAR18	[1 1 1]	[1 1 1]	0.899	18.2751	18.2751	18.2751	60	60	60	68	-4.68	[0 0 0]	[17 10 5]	3
MIBQAR06	NODTIL	[44 44 44]	[45 45 45]	2.9246	804.104	804.104	804.104	60	60	60	118	-4.845	[0 180 180]	[11 15 1]	3
MIBQAR06	NODTOR	[1 1 1]	[1 1 1]	2.0702	18.2751	18.2751	18.2751	60	60	60	83	-4.544	[0 180 0]	[35 20 13]	3
MIBQAR06	PEVQAK	[1 1 1]	[1 1 1]	2.4677	18.2751	18.2751	18.2751	60	60	60	97	-4.388	[0 180 180]	[20 8 7]	3
MIBQAR06	SAHYOQ	[1 1 1]	[1 1 1]	0.4638	18.2751	18.2751	18.2751	60	60	60	63	-4.498	[0 180 180]	[11 6 14]	3
MIBQAR06	SAHYOQ02	[1 1 1]	[1 1 1]	0.5685	18.2751	18.2751	18.2751	60	60	60	53	-4.543	[0 180 180]	[9 14 2]	3
MIBQAR06	SAHYOQ03	[1 1 1]	[1 1 1]	0.1296	18.2751	18.2751	18.2751	60	60	60	48	-4.54	[0 180 180]	[9 14 2]	3
MIBQAR06	SAHYOQ05	[1 1 1]	[1 1 1]	0.4966	18.2751	18.2751	18.2751	60	60	60	70	-4.544	[0 180 180]	[9 14 2]	3
MIBQAR06	UNIGEE	[1 1 1]	[1 1 1]	2.1943	18.2751	18.2751	18.2751	60	60	60	72	-4.694	[0 0 0]	[18 12 5]	3
MIBQAR06	VUSKAW	[1 1 1]	[1 1 1]	0.3868	18.2751	18.2751	18.2751	60	60	60	68	-4.537	[0 0 0]	[20 20 13]	3
MIBQAR06	XUPGOG	[1 1 1]	[1 1 1]	2.7935	18.2751	18.2751	18.2751	60	60	60	97	-4.676	[0 0 0]	[9 14 2]	3
MIBQAR07	EDUSIF	[1 1 1]	[1 1 1]	0.0723	18.2704	18.2704	18.2704	60	60	60	65	-4.512	[0 180 180]	[20 20 13]	3
MIBQAR07	HIFTOG01	[50 1 1]	[51 1 1]	1.9428	913.52	18.2704	18.2704	60	60	60	58	-4.479	[0 0 0]	[35 20 13]	3
MIBQAR07	LAWGEW	[1 1 1]	[1 1 1]	0.2067	18.2704	18.2704	18.2704	60	60	60	54	-4.566	[0 180 180]	[9 14 2]	3
MIBQAR07	LAWGIA	[1 1 1]	[1 1 1]	0.3919	18.2704	18.2704	18.2704	60	60	60	54	-4.558	[0 180 180]	[9 14 2]	3
MIBQAR07	LAWGOG	[1 1 1]	[1 1 1]	0.5883	18.2704	18.2704	18.2704	60	60	60	53	-4.55	[0 180 180]	[9 14 2]	3
MIBQAR07	LAWGUM	[1 1 1]	[1 1 1]	0.693	18.2704	18.2704	18.2704	60	60	60	52	-4.545	[0 180 180]	[9 14 2]	3
MIBQAR07	MIBQAR	[1 1 1]	[1 1 1]	0.621	18.2704	18.2704	18.2704	60	60	60	68	-4.617	[0 180 180]	[18 9 10]	3
MIBQAR07	MIBQAR01	[1 1 1]	[1 1 1]	0.5131	18.2704	18.2704	18.2704	60	60	60	68	-4.622	[0 180 180]	[18 9 10]	3
MIBQAR07	MIBQAR02	[1 1 1]	[1 1 1]	0.428	18.2704	18.2704	18.2704	60	60	60	69	-4.625	[0 180 180]	[18 9 10]	3
MIBQAR07	MIBQAR03	[1 1 1]	[1 1 1]	0.3018	18.2704	18.2704	18.2704	60	60	60	69	-4.634	[0 0 0]	[17 10 5]	3
MIBQAR07	MIBQAR04	[1 1 1]	[1 1 1]	0.2576	18.2704	18.2704	18.2704	60	60	60	69	-4.633	[0 0 0]	[17 10 5]	3
MIBQAR07	MIBQAR05	[1 1 1]	[1 1 1]	0.1395	18.2704	18.2704	18.2704	60	60	60	69	-4.642	[0 0 0]	[17 10 5]	3
MIBQAR07	MIBQAR06	[1 1 1]	[1 1 1]	0.0772	18.2704	18.2704	18.2704	60	60	60	70	-4.643	[0 0 0]	[17 10 5]	3
MIBQAR07	MIBQAR07	[1 1 1]	[1 1 1]	0	18.2704	18.2704	18.2704	60	60	60	69	-4.649	[0 0 0]	[17 10 5]	4
MIBQAR07	MIBQAR08	[1 1 1]	[1 1 1]	0.069	18.2704	18.2704	18.2704	60	60	60	70	-4.65	[0 0 0]	[17 10 5]	3
MIBQAR07	MIBQAR11	[1 1 1]	[1 1 1]	0.3238	18.2704	18.2704	18.2704	60	60	60	70	-4.661	[0 0 0]	[17 10 5]	3
MIBQAR07	MIBQAR12	[1 1 1]	[1 1 1]	0.4094	18.2704	18.2704	18.2704	60	60	60	70	-4.666	[0 0 0]	[17 10 5]	3
MIBQAR07	MIBQAR13	[1 1 1]	[1 1 1]	0.4638	18.2704	18.2704	18.2704	60	60	60	69	-4.669	[0 0 0]	[17 10 5]	3
MIBQAR07	MIBQAR14	[1 1 1]	[1 1 1]	0.5676	18.2704	18.2704	18.2704	60	60	60	70	-4.673	[0 0 0]	[17 10 5]	3
MIBQAR07	MIBQAR15	[1 1 1]	[1 1 1]	0.5923	18.2704	18.2704	18.2704	60	60	60	70	-4.674	[0 0 0]	[17 10 5]	3
MIBQAR07	MIBQAR16	[1 1 1]	[1 1 1]	0.6978	18.2704	18.2704	18.2704	60	60	60	69	-4.679	[0 0 0]	[17 10 5]	3
MIBQAR07	MIBQAR18	[1 1 1]	[1 1 1]	0.8216	18.2704	18.2704	18.2704	60	60	60	70	-4.683	[0 0 0]	[17 10 5]	3
MIBQAR07	MIBQAR19	[1 1 1]	[1 1 1]	0.9703	18.2704	18.2704	18.2704	60	60	60	69	-4.69	[0 0 0]	[17 10 5]	3
MIBQAR07	NIRZAQ	[1 1 1]	[1 1 1]	0.3584	18.2704	18.2704	18.2704	60	60	60	69	-4.62	[0 0 0]	[26 15 1]	3
MIBQAR07	NODTIL	[45 45 45]	[46 46 46]	2.8543	822.168	822.168	822.168	60	60	60	119	-4.852	[0 180 180]	[11 15 1]	3
MIBQAR07	NODTOR	[1 1 1]	[1 1 1]	1.9925	18.2704	18.2704	18.2704	60	60	60	83	-4.551	[0 180 0]	[35 20 13]	3
MIBQAR07	PEVPUD	[1 1 1]	[1 1 1]	1.134	18.2704	18.2704	18.2704	60	60	60	93	-4.293	[0 0 0]	[9 14 2]	3
MIBQAR07	PEVQAK	[1 1 1]	[1 1 1]	2.3899	18.2704	18.2704	18.2704	60	60	60	96	-4.393	[0 180 180]	[20 8 7]	3
MIBQAR07	PEVQEO	[1 1 1]	[1 1 1]	2.9967	18.2704	18.2704	18.2704	60	60	60	71	-4.764	[0 180 180]	[3 0 0]	3
MIBQAR07	SAHYIK	[1 1 1]	[1 1 1]	1.9784	18.2704	18.2704	18.2704	60	60	60	57	-4.583	[0 180 180]	[11 6 14]	3
MIBQAR07	SAHYOQ	[1 1 1]	[1 1 1]	0.5409	18.2704	18.2704	18.2704	60	60	60	63	-4.497	[0 180 180]	[11 6 14]	3
MIBQAR07	SAHYOQ02	[1 1 1]	[1 1 1]	0.6456	18.2704	18.2704	18.2704	60	60	60	53	-4.549	[0 180 180]	[9 14 2]	3
MIBQAR07	SAHYOQ03	[1 1 1]	[1 1 1]	0.2067	18.2704	18.2704	18.2704	60	60	60	48	-4.546	[0 180 180]	[9 14 2]	3
MIBQAR07	SAHYOQ04	[1 1 1]	[1 1 1]	0.5736	18.2704	18.2704	18.2704	60	60	60	51	-4.547	[0 180 180]	[9 14 2]	3
MIBQAR07	SAHYOQ05	[1 1 1]	[1 1 1]	0.5736	18.2704	18.2704	18.2704	60	60	60	70	-4.55	[0 180 180]	[9 14 2]	3
MIBQAR07	UNIGEE	[1 1 1]	[1 1 1]	2.1166	18.2704	18.2704	18.2704	60	60	60	72	-4.706	[0 0 0]	[18 12 5]	3
MIBQAR07	VAZTOG	[1 1 1]	[1 1 1]	0.5082	18.2704	18.2704	18.2704	60	60	60	48	-4.547	[0 180 180]	[9 14 2]	3
MIBQAR07	VUSJUP	[1 1 1]	[1 1 1]	2.8131	18.2704	18.2704	18.2704	60	60	60	69	-3.129	[0 180 180]	[0 0 0]	3
MIBQAR07	VUSKAW	[1 1 1]	[1 1 1]	0.3095	18.2704	18.2704	18.2704	60	60	60	69	-4.542	[0 0 0]	[20 20 13]	3
MIBQAR07	VUSKEA	[1 1 1]	[1 1 1]	0.3095	18.2704	18.2704	18.2704	60	60	60	70	-4.584	[0 180 180]	[3 0 0]	3
MIBQAR07	XUPGOG	[1 1 1]	[1 1 1]	2.7156	18.2704	18.2704	18.2704	60	60	60	97	-4.683	[0 0 0]	[9 14 2]	3
MIBQAR08	MIBQAR04	[1 1 1]	[1 1 1]	0.3265	18.2662	18.2662	18.2662	60	60	60	70	-4.643	[0 180 180]	[18 9 10]	3
MIBQAR08	MIBQAR08	[1 1 1]	[1 1 1]	0	18.2662	18.2662	18.2662	60	60	60	73	-4.661	[0 180 180]	[18 9 10]	4
MIBQAR08	MIBQAR14	[1 1 1]	[1 1 1]	0.4985	18.2662	18.2662	18.2662	60	60	60	70	-4.679	[0 0 0]	[17 10 5]	3
MIBQAR08	NODTIL	[45 45 45]	[46 46 46]	2.9226	821.979	821.979	821.979	60	60	60	119	-4.864	[0 180 180]	[11 15 1]	3
MIBQAR08	NODTOR	[1 1 1]	[1 1 1]	1.9231	18.2662	18.2662	18.2662	60	60	60	83	-4.562	[0 180 0]	[35 20 13]	3
MIBQAR08	PEVQAK	[1 1 1]	[1 1 1]	2.3204	18.2662	18.2662	18.2662	60	60	60	96	-4.4	[0 180 180]	[20 8 7]	3
MIBQAR08	SAHYOQ	[1 1 1]	[1 1 1]	0.6097	18.2662	18.2662	18.2662	60	60	60	64	-4.518	[0 0 0]	[11 15 1]	3
MIBQAR08	SAHYOQ02	[1 1 1]	[1 1 1]	0.7144	18.2662	18.2662	18.2662	60	60	60	53	-4.556	[0 180 180]	[9 14 2]	3
MIBQAR08	SAHYOQ03	[1 1 1]	[1 1 1]	0.2757	18.2662	18.2662	18.2662	60	60	60	48	-4.554	[0 180 180]	[9 14 2]	3
MIBQAR08	SAHYOQ05	[1 1 1]	[1 1 1]	0.6424	18.2662	18.2662	18.2662	60	60	60	72	-4.557	[0 180 180]	[9 14 2]	3
MIBQAR08	UNIGEE	[1 1 1]	[1 1 1]	2.0471	18.2662	18.2662	18.2662	60	60	60	71	-4.72	[0 0 0]	[18 12 5]	3
MIBQAR08	XUPGOG	[1 1 1]	[1 1 1]	2.646	18.2662	18.2662	18.2662	60	60	60	99	-4.693	[0 0 0]	[9 14 2]	3
MIBQAR10	EDUSIF	[1 1 1]	[1 1 1]	0.1807	18.255	18.255	18.255	60	60	60	67	-4.547	[0 0 0]	[11 15 1]	3
MIBQAR10	HIFTOG01	[1 1 1]	[1 1 1]	2.0727	18.255	18.255	18.255	60	60	60	59	-4.472	[0 0 0]	[35 20 13]	3
MIBQAR10	LAWGEW	[1 1 1]	[1 1 1]	0.4594	18.255	18.255	18.255	60	60	60	55	-4.585	[0 180 180]	[9 14 2]	3
MIBQAR10	LAWGIA	[1 1 1]	[1 1 1]	0.6445	18.255	18.255	18.255	60	60	60	54	-4.577	[0 180 180]	[9 14 2]	3
MIBQAR10	LAWGOG	[1 1 1]	[1 1 1]	0.8407	18.255	18.255	18.255	60	60	60	53	-4.568	[0 180 180]	[9 14 2]	3
MIBQAR10	LAWGUM	[1 1 1]	[1 1 1]	0.9452	18.255	18.255	18.255	60	60	60	53	-4.564	[0 180 180]	[9 14 2]	3
MIBQAR10	MIBQAR	[1 1 1]	[1 1 1]	0.8734	18.255	18.255	18.255	60	60	60	72	-4.662	[0 180 180]	[18 9 10]	3
MIBQAR10	MIBQAR01	[1 1 1]	[1 1 1]	0.7655	18.255	18.255	18.255	60	60	60	72	-4.667	[0 180 180]	[18 9 10]	3
MIBQAR10	MIBQAR02	[1 1 1]	[1 1 1]	0.6805	18.255	18.255	18.255	60	60	60	72	-4.67	[0 180 180]	[18 9 10]	3
MIBQAR10	MIBQAR03	[1 1 1]	[1 1 1]	0.5544	18.255	18.255	18.255	60	60	60	71	-4.67	[0 180 180]	[18 9 10]	3
MIBQAR10	MIBQAR04	[1 1 1]	[1 1 1]	0.5102	18.255	18.255	18.255	60	60	60	73	-4.673	[0 180 180]	[18 9 10]	3
MIBQAR10	MIBQAR05	[1 1 1]	[1 1 1]	0.3923	18.255	18.255	18.255	60	60	60	73	-4.679	[0 180 180]	[18 9 10]	3
MIBQAR10	MIBQAR06	[1 1 1]	[1 1 1]	0.33	18.255	18.255	18.255	60	60	60	73	-4.682	[0 180 180]	[18 9 10]	3
MIBQAR10	MIBQAR07	[1 1 1]	[1 1 1]	0.2529	18.255	18.255	18.255	60	60	60	73	-4.685	[0 180 180]	[18 9 10]	3
MIBQAR10	MIBQAR08	[1 1 1]	[1 1 1]	0.1839	18.255	18.255	18.255	60	60	60	73	-4.691	[0 180 180]	[18 9 10]	3
MIBQAR10	MIBQAR10	[1 1 1]	[1 1 1]	0	18.255	18.255	18.255	60	60	60	73	-4.695	[0 180 180]	[18 9 10]	4
MIBQAR10	MIBQAR11	[1 1 1]	[1 1 1]	0.0707	18.255	18.255	18.255	60	60	60	73	-4.692	[0 180 180]	[18 9 10]	3
MIBQAR10	MIBQAR12	[1 1 1]	[1 1 1]	0.1562	18.255	18.255	18.255	60	60	60	73	-4.686	[0 180 180]	[18 9 10]	3
MIBQAR10	MIBQAR13	[1 1 1]	[1 1 1]	0.2105	18.255	18.255	18.255	60	60	60	73	-4.685	[0 180 180]	[18 9 10]	3
MIBQAR10	MIBQAR14	[1 1 1]	[1 1 1]	0.3142	18.255	18.255	18.255	60	60	60	73	-4.68	[0 0 0]	[17 10 5]	3
MIBQAR10	MIBQAR15	[1 1 1]	[1 1 1]	0.3389	18.255	18.255	18.255	60	60	60	73	-4.681	[0 0 0]	[17 10 5]	3
MIBQAR10	MIBQAR16	[1 1 1]	[1 1 1]	0.4444	18.255	18.255	18.255	60	60	60	73	-4.687	[0 0 0]	[17 10 5]	3
MIBQAR10	MIBQAR18	[1 1 1]	[1 1 1]	0.568	18.255	18.255	18.255	60	60	60	73	-4.691	[0 0 0]	[17 10 5]	3
MIBQAR10	MIBQAR19	[1 1 1]	[1 1 1]	0.7166	18.255	18.255	18.255	60	60	60	72	-4.698	[0 0 0]	[17 10 5]	3
MIBQAR10	NIRZAQ	[1 1 1]	[1 1 1]	0.1052	18.255	18.255	18.255	60	60	60	72	-4.663	[0 0 0]	[26 15 1]	3
MIBQAR10	NODTIL	[46 46 46]	[47 47 47]	2.9643	839.73	839.73	839.73	60	60	60	119	-4.877	[0 180 180]	[11 15 1]	3
MIBQAR10	NODTOR	[1 1 1]	[1 1 1]	1.738	18.255	18.255	18.255	60	60	60	84	-4.574	[0 180 0]	[35 20 13]	3
MIBQAR10	PEVPUD	[1 1 1]	[1 1 1]	0.8801	18.255	18.255	18.255	60	60	60	92	-4.307	[0 0 0]	[9 14 2]	3
MIBQAR10	PEVQAK	[1 1 1]	[1 1 1]	2.1351	18.255	18.255	18.255	60	60	60	96	-4.409	[0 180 180]	[20 8 7]	3
MIBQAR10	PEVQEO	[1 1 1]	[1 1 1]	2.7413	18.255	18.255	18.255	60	60	60	74	-4.794	[0 180 180]	[3 0 0]	3
MIBQAR10	SAHYIK	[1 1 1]	[1 1 1]	1.7239	18.255	18.255	18.255	60	60	60	58	-4.615	[0 0 0]	[11 15 1]	3
MIBQAR10	SAHYOQ	[1 1 1]	[1 1 1]	0.7933	18.255	18.255	18.255	60	60	60	67	-4.546	[0 0 0]	[3 0 0]	3
MIBQAR10	SAHYOQ02	[1 1 1]	[1 1 1]	0.8979	18.255	18.255	18.255	60	60	60	53	-4.567	[0 180 180]	[9 14 2]	3
MIBQAR10	SAHYOQ03	[1 1 1]	[1 1 1]	0.4594	18.255	18.255	18.255	60	60	60	50	-4.567	[0 180 180]	[9 14 2]	3
MIBQAR10	SAHYOQ04	[1 1 1]	[1 1 1]	0.826	18.255	18.255	18.255	60	60	60	53	-4.567	[0 180 180]	[9 14 2]	3
MIBQAR10	SAHYOQ05	[1 1 1]	[1 1 1]	0.826	18.255	18.255	18.255	60	60	60	71	-4.567	[0 180 180]	[9 14 2]	3
MIBQAR10	UNIGEE	[1 1 1]	[1 1 1]	1.8619	18.255	18.255	18.255	60	60	60	72	-4.748	[0 0 0]	[18 12 5]	3
MIBQAR10	VAZTOG	[1 1 1]	[1 1 1]	0.7606	18.255	18.255	18.255	60	60	60	47	-4.568	[0 180 180]	[9 14 2]	3
MIBQAR10	VUSJUP	[1 1 1]	[1 1 1]	2.5579	18.255	18.255	18.255	60	60	60	72	-3.149	[0 180 180]	[0 0 0]	3
MIBQAR10	VUSKAW	[1 1 1]	[1 1 1]	0.0564	18.255	18.255	18.255	60	60	60	71	-4.565	[0 180 180]	[19 2 1]	3
MIBQAR10	VUSKEA	[1 1 1]	[1 1 1]	0.0564	18.255	18.255	18.255	60	60	60	72	-4.619	[0 180 180]	[3 0 0]	3
MIBQAR10	XUPGOG	[1 1 1]	[1 1 1]	2.4604	18.255	18.255	18.255	60	60	60	101	-4.707	[0 0 0]	[9 14 2]	3
MIBQAR11	LAWGEW	[1 1 1]	[1 1 1]	0.53	18.2507	18.2507	18.2507	60	60	60	55	-4.59	[0 180 180]	[9 14 2]	3
MIBQAR11	LAWGIA	[1 1 1]	[1 1 1]	0.715	18.2507	18.2507	18.2507	60	60	60	55	-4.583	[0 180 180]	[9 14 2]	3
MIBQAR11	LAWGOG	[1 1 1]	[1 1 1]	0.9112	18.2507	18.2507	18.2507	60	60	60	53	-4.574	[0 180 180]	[9 14 2]	3
MIBQAR11	LAWGUM	[1 1 1]	[1 1 1]	1.0157	18.2507	18.2507	18.2507	60	60	60	53	-4.57	[0 180 180]	[9 14 2]	3
MIBQAR11	MIBQAR01	[1 1 1]	[1 1 1]	0.836	18.2507	18.2507	18.2507	60	60	60	72	-4.677	[0 180 180]	[18 9 10]	3
MIBQAR11	MIBQAR02	[1 1 1]	[1 1 1]	0.751	18.2507	18.2507	18.2507	60	60	60	72	-4.681	[0 180 180]	[18 9 10]	3
MIBQAR11	MIBQAR03	[1 1 1]	[1 1 1]	0.625	18.2507	18.2507	18.2507	60	60	60	72	-4.68	[0 180 180]	[18 9 10]	3
MIBQAR11	MIBQAR04	[1 1 1]	[1 1 1]	0.5808	18.2507	18.2507	18.2507	60	60	60	72	-4.683	[0 180 180]	[18 9 10]	3
MIBQAR11	MIBQAR06	[1 1 1]	[1 1 1]	0.4005	18.2507	18.2507	18.2507	60	60	60	73	-4.692	[0 180 180]	[18 9 10]	3
MIBQAR11	MIBQAR08	[1 1 1]	[1 1 1]	0.2546	18.2507	18.2507	18.2507	60	60	60	73	-4.701	[0 180 180]	[18 9 10]	3
MIBQAR11	MIBQAR11	[1 1 1]	[1 1 1]	0	18.2507	18.2507	18.2507	60	60	60	73	-4.708	[0 180 180]	[18 9 10]	4
MIBQAR11	MIBQAR12	[1 1 1]	[1 1 1]	0.0855	18.2507	18.2507	18.2507	60	60	60	73	-4.703	[0 180 180]	[18 9 10]	3
MIBQAR11	MIBQAR14	[1 1 1]	[1 1 1]	0.2435	18.2507	18.2507	18.2507	60	60	60	73	-4.696	[0 180 180]	[18 9 10]	3
MIBQAR11	MIBQAR15	[1 1 1]	[1 1 1]	0.2682	18.2507	18.2507	18.2507	60	60	60	73	-4.693	[0 180 180]	[18 9 10]	3
MIBQAR11	MIBQAR18	[1 1 1]	[1 1 1]	0.4972	18.2507	18.2507	18.2507	60	60	60	73	-4.694	[0 0 0]	[17 10 5]	3
MIBQAR11	NODTIL	[47 47 47]	[48 48 48]	2.8998	857.783	857.783	857.783	60	60	60	120	-4.884	[0 180 180]	[11 15 1]	3
MIBQAR11	NODTOR	[1 1 1]	[1 1 1]	1.6669	18.2507	18.2507	18.2507	60	60	60	85	-4.579	[0 180 0]	[35 20 13]	3
MIBQAR11	PEVPUD	[1 1 1]	[1 1 1]	0.8093	18.2507	18.2507	18.2507	60	60	60	93	-4.313	[0 0 0]	[9 14 2]	3
MIBQAR11	PEVQAK	[1 1 1]	[1 1 1]	2.0639	18.2507	18.2507	18.2507	60	60	60	96	-4.415	[0 180 180]	[20 8 7]	3
MIBQAR11	SAHYIK	[1 1 1]	[1 1 1]	1.6528	18.2507	18.2507	18.2507	60	60	60	58	-4.623	[0 0 0]	[11 15 1]	3
MIBQAR11	SAHYOQ	[1 1 1]	[1 1 1]	0.8638	18.2507	18.2507	18.2507	60	60	60	66	-4.551	[0 0 0]	[3 0 0]	3
MIBQAR11	SAHYOQ02	[1 1 1]	[1 1 1]	0.9683	18.2507	18.2507	18.2507	60	60	60	53	-4.573	[0 180 180]	[9 14 2]	3
MIBQAR11	SAHYOQ03	[1 1 1]	[1 1 1]	0.53	18.2507	18.2507	18.2507	60	60	60	50	-4.573	[0 180 180]	[9 14 2]	3
MIBQAR11	SAHYOQ04	[1 1 1]	[1 1 1]	0.8965	18.2507	18.2507	18.2507	60	60	60	53	-4.573	[0 180 180]	[9 14 2]	3
MIBQAR11	SAHYOQ05	[1 1 1]	[1 1 1]	0.8965	18.2507	18.2507	18.2507	60	60	60	71	-4.574	[0 180 180]	[9 14 2]	3
MIBQAR11	UNIGEE	[1 1 1]	[1 1 1]	1.7908	18.2507	18.2507	18.2507	60	60	60	71	-4.758	[0 0 0]	[18 12 5]	3
MIBQAR11	VAZTOG	[1 1 1]	[1 1 1]	0.8311	18.2507	18.2507	18.2507	60	60	60	47	-4.574	[0 180 180]	[9 14 2]	3
MIBQAR11	VUSJUP	[1 1 1]	[1 1 1]	2.4866	18.2507	18.2507	18.2507	60	60	60	73	-3.152	[0 180 180]	[0 0 0]	3
MIBQAR11	VUSKAW	[1 1 1]	[1 1 1]	0.0146	18.2507	18.2507	18.2507	60	60	60	70	-4.574	[0 180 180]	[19 2 1]	3
MIBQAR11	VUSKEA	[1 1 1]	[1 1 1]	0.0146	18.2507	18.2507	18.2507	60	60	60	72	-4.621	[0 180 180]	[3 0 0]	3
MIBQAR11	XUPGOG	[1 1 1]	[1 1 1]	2.3892	18.2507	18.2507	18.2507	60	60	60	100	-4.712	[0 0 0]	[9 14 2]	3
MIBQAR12	LAWGEW	[1 1 1]	[1 1 1]	0.6153	18.2455	18.2455	18.2455	60	60	60	55	-4.597	[0 180 180]	[9 14 2]	3
MIBQAR12	LAWGIA	[1 1 1]	[1 1 1]	0.8002	18.2455	18.2455	18.2455	60	60	60	54	-4.589	[0 180 180]	[9 14 2]	3
MIBQAR12	MIBQAR01	[1 1 1]	[1 1 1]	0.9212	18.2455	18.2455	18.2455	60	60	60	72	-4.689	[0 180 180]	[18 9 10]	3
MIBQAR12	MIBQAR02	[1 1 1]	[1 1 1]	0.8362	18.2455	18.2455	18.2455	60	60	60	72	-4.692	[0 180 180]	[18 9 10]	3
MIBQAR12	MIBQAR03	[1 1 1]	[1 1 1]	0.7103	18.2455	18.2455	18.2455	60	60	60	72	-4.692	[0 180 180]	[18 9 10]	3
MIBQAR12	MIBQAR04	[1 1 1]	[1 1 1]	0.6661	18.2455	18.2455	18.2455	60	60	60	72	-4.695	[0 180 180]	[18 9 10]	3
MIBQAR12	MIBQAR06	[1 1 1]	[1 1 1]	0.4859	18.2455	18.2455	18.2455	60	60	60	73	-4.704	[0 180 180]	[18 9 10]	3
MIBQAR12	MIBQAR08	[1 1 1]	[1 1 1]	0.34	18.2455	18.2455	18.2455	60	60	60	73	-4.713	[0 180 180]	[18 9 10]	3
MIBQAR12	MIBQAR12	[1 1 1]	[1 1 1]	0	18.2455	18.2455	18.2455	60	60	60	73	-4.722	[0 180 180]	[18 9 10]	4
MIBQAR12	MIBQAR14	[1 1 1]	[1 1 1]	0.1579	18.2455	18.2455	18.2455	60	60	60	73	-4.716	[0 180 180]	[18 9 10]	3
MIBQAR12	MIBQAR15	[1 1 1]	[1 1 1]	0.1826	18.2455	18.2455	18.2455	60	60	60	73	-4.713	[0 180 180]	[18 9 10]	3
MIBQAR12	MIBQAR18	[1 1 1]	[1 1 1]	0.4116	18.2455	18.2455	18.2455	60	60	60	73	-4.698	[0 180 180]	[18 9 10]	3
MIBQAR12	NODTIL	[47 47 47]	[48 48 48]	2.9845	857.538	857.538	857.538	60	60	60	120	-4.889	[0 180 180]	[11 15 1]	3
MIBQAR12	NODTOR	[1 1 1]	[1 1 1]	1.5809	18.2455	18.2455	18.2455	60	60	60	85	-4.584	[0 180 0]	[35 20 13]	3
MIBQAR12	PEVPUD	[1 1 1]	[1 1 1]	0.7236	18.2455	18.2455	18.2455	60	60	60	93	-4.319	[0 0 0]	[9 14 2]	3
MIBQAR12	PEVQAK	[1 1 1]	[1 1 1]	1.9778	18.2455	18.2455	18.2455	60	60	60	95	-4.42	[0 180 180]	[20 8 7]	3
MIBQAR12	SAHYIK	[1 1 1]	[1 1 1]	1.5669	18.2455	18.2455	18.2455	60	60	60	57	-4.627	[0 0 0]	[11 15 1]	3
MIBQAR12	SAHYOQ	[1 1 1]	[1 1 1]	0.949	18.2455	18.2455	18.2455	60	60	60	67	-4.559	[0 0 0]	[3 0 0]	3
MIBQAR12	SAHYOQ02	[1 1 1]	[1 1 1]	1.0535	18.2455	18.2455	18.2455	60	60	60	54	-4.582	[0 180 180]	[26 15 1]	3
MIBQAR12	SAHYOQ03	[1 1 1]	[1 1 1]	0.6153	18.2455	18.2455	18.2455	60	60	60	50	-4.579	[0 180 180]	[9 14 2]	3
MIBQAR12	SAHYOQ04	[1 1 1]	[1 1 1]	0.9817	18.2455	18.2455	18.2455	60	60	60	53	-4.579	[0 180 180]	[9 14 2]	3
MIBQAR12	SAHYOQ05	[1 1 1]	[1 1 1]	0.9817	18.2455	18.2455	18.2455	60	60	60	71	-4.58	[0 180 180]	[9 14 2]	3
MIBQAR12	UNIGEE	[1 1 1]	[1 1 1]	1.7048	18.2455	18.2455	18.2455	60	60	60	71	-4.77	[0 0 0]	[18 12 5]	3
MIBQAR12	VAZTOG	[1 1 1]	[1 1 1]	0.9163	18.2455	18.2455	18.2455	60	60	60	49	-4.58	[0 180 180]	[9 14 2]	3
MIBQAR12	VUSJUP	[1 1 1]	[1 1 1]	2.4005	18.2455	18.2455	18.2455	60	60	60	73	-3.155	[0 180 180]	[0 0 0]	3
MIBQAR12	VUSKAW	[1 1 1]	[1 1 1]	0.0998	18.2455	18.2455	18.2455	60	60	60	70	-4.581	[0 180 180]	[19 2 1]	3
MIBQAR12	VUSKEA	[1 1 1]	[1 1 1]	0.0998	18.2455	18.2455	18.2455	60	60	60	71	-4.625	[0 180 180]	[3 0 0]	3
MIBQAR12	XUPGOG	[1 1 1]	[1 1 1]	2.303	18.2455	18.2455	18.2455	60	60	60	101	-4.717	[0 0 0]	[9 14 2]	3
MIBQAR13	LAWGEW	[1 1 1]	[1 1 1]	0.6695	18.2422	18.2422	18.2422	60	60	60	54	-4.604	[0 180 180]	[26 15 1]	3
MIBQAR13	LAWGIA	[1 1 1]	[1 1 1]	0.8544	18.2422	18.2422	18.2422	60	60	60	54	-4.601	[0 180 180]	[26 15 1]	3
MIBQAR13	LAWGOG	[1 1 1]	[1 1 1]	1.0505	18.2422	18.2422	18.2422	60	60	60	53	-4.6	[0 180 180]	[26 15 1]	3
MIBQAR13	LAWGUM	[1 1 1]	[1 1 1]	1.1549	18.2422	18.2422	18.2422	60	60	60	53	-4.597	[0 180 180]	[26 15 1]	3
MIBQAR13	MIBQAR01	[1 1 1]	[1 1 1]	0.9753	18.2422	18.2422	18.2422	60	60	60	72	-4.697	[0 180 180]	[18 9 10]	3
MIBQAR13	MIBQAR02	[1 1 1]	[1 1 1]	0.8903	18.2422	18.2422	18.2422	60	60	60	72	-4.701	[0 180 180]	[18 9 10]	3
MIBQAR13	MIBQAR03	[1 1 1]	[1 1 1]	0.7644	18.2422	18.2422	18.2422	60	60	60	72	-4.7	[0 180 180]	[18 9 10]	3
MIBQAR13	MIBQAR04	[1 1 1]	[1 1 1]	0.7202	18.2422	18.2422	18.2422	60	60	60	72	-4.703	[0 180 180]	[18 9 10]	3
MIBQAR13	MIBQAR05	[1 1 1]	[1 1 1]	0.6023	18.2422	18.2422	18.2422	60	60	60	72	-4.709	[0 180 180]	[18 9 10]	3
MIBQAR13	MIBQAR06	[1 1 1]	[1 1 1]	0.5401	18.2422	18.2422	18.2422	60	60	60	72	-4.712	[0 180 180]	[18 9 10]	3
MIBQAR13	MIBQAR08	[1 1 1]	[1 1 1]	0.3942	18.2422	18.2422	18.2422	60	60	60	73	-4.721	[0 180 180]	[18 9 10]	3
MIBQAR13	MIBQAR11	[1 1 1]	[1 1 1]	0.1397	18.2422	18.2422	18.2422	60	60	60	73	-4.729	[0 180 180]	[18 9 10]	3
MIBQAR13	MIBQAR12	[1 1 1]	[1 1 1]	0.0543	18.2422	18.2422	18.2422	60	60	60	73	-4.731	[0 180 180]	[18 9 10]	3
MIBQAR13	MIBQAR13	[1 1 1]	[1 1 1]	0	18.2422	18.2422	18.2422	60	60	60	73	-4.735	[0 180 180]	[18 9 10]	4
MIBQAR13	MIBQAR14	[1 1 1]	[1 1 1]	0.1036	18.2422	18.2422	18.2422	60	60	60	73	-4.729	[0 180 180]	[18 9 10]	3
MIBQAR13	MIBQAR15	[1 1 1]	[1 1 1]	0.1283	18.2422	18.2422	18.2422	60	60	60	73	-4.726	[0 180 180]	[18 9 10]	3
MIBQAR13	MIBQAR16	[1 1 1]	[1 1 1]	0.2337	18.2422	18.2422	18.2422	60	60	60	73	-4.717	[0 180 180]	[18 9 10]	3
MIBQAR13	MIBQAR18	[1 1 1]	[1 1 1]	0.3573	18.2422	18.2422	18.2422	60	60	60	73	-4.712	[0 180 180]	[18 9 10]	3
MIBQAR13	NODTIL	[48 48 48]	[49 49 49]	2.9092	875.626	875.626	875.626	60	60	60	120	-4.896	[0 180 180]	[11 15 1]	3
MIBQAR13	NODTOR	[1 1 1]	[1 1 1]	1.5264	18.2422	18.2422	18.2422	60	60	60	86	-4.588	[0 180 0]	[35 20 13]	3
MIBQAR13	PEVPUD	[1 1 1]	[1 1 1]	0.6692	18.2422	18.2422	18.2422	60	60	60	92	-4.324	[0 0 0]	[9 14 2]	3
MIBQAR13	PEVQAK	[1 1 1]	[1 1 1]	1.9232	18.2422	18.2422	18.2422	60	60	60	94	-4.427	[0 180 180]	[20 8 7]	3
MIBQAR13	SAHYIK	[1 1 1]	[1 1 1]	1.5123	18.2422	18.2422	18.2422	60	60	60	57	-4.638	[0 0 0]	[11 15 1]	3
MIBQAR13	SAHYOQ	[1 1 1]	[1 1 1]	1.0031	18.2422	18.2422	18.2422	60	60	60	68	-4.561	[0 0 0]	[11 15 1]	3
MIBQAR13	SAHYOQ02	[1 1 1]	[1 1 1]	1.1076	18.2422	18.2422	18.2422	60	60	60	53	-4.597	[0 180 180]	[26 15 1]	3
MIBQAR13	SAHYOQ03	[1 1 1]	[1 1 1]	0.6695	18.2422	18.2422	18.2422	60	60	60	50	-4.584	[0 180 180]	[9 14 2]	3
MIBQAR13	SAHYOQ04	[1 1 1]	[1 1 1]	1.0358	18.2422	18.2422	18.2422	60	60	60	52	-4.584	[0 180 180]	[9 14 2]	3
MIBQAR13	SAHYOQ05	[1 1 1]	[1 1 1]	1.0358	18.2422	18.2422	18.2422	60	60	60	70	-4.59	[0 180 180]	[26 15 1]	3
MIBQAR13	UNIGEE	[1 1 1]	[1 1 1]	1.6503	18.2422	18.2422	18.2422	60	60	60	71	-4.778	[0 0 0]	[18 12 5]	3
MIBQAR13	VAZTOG	[1 1 1]	[1 1 1]	0.9704	18.2422	18.2422	18.2422	60	60	60	48	-4.585	[0 180 180]	[9 14 2]	3
MIBQAR13	VUSJUP	[1 1 1]	[1 1 1]	2.3458	18.2422	18.2422	18.2422	60	60	60	74	-3.157	[0 180 180]	[0 0 0]	3
MIBQAR13	VUSKAW	[1 1 1]	[1 1 1]	0.154	18.2422	18.2422	18.2422	60	60	60	70	-4.587	[0 180 180]	[19 2 1]	3
MIBQAR13	VUSKEA	[1 1 1]	[1 1 1]	0.154	18.2422	18.2422	18.2422	60	60	60	71	-4.625	[0 180 180]	[3 0 0]	3
MIBQAR13	XUPGOG	[1 1 1]	[1 1 1]	2.2484	18.2422	18.2422	18.2422	60	60	60	99	-4.721	[0 0 0]	[9 14 2]	3
MIBQAR14	MIBQAR04	[1 1 1]	[1 1 1]	0.8236	18.2359	18.2359	18.2359	60	60	60	72	-4.719	[0 180 180]	[18 9 10]	3
MIBQAR14	MIBQAR14	[1 1 1]	[1 1 1]	0	18.2359	18.2359	18.2359	60	60	60	73	-4.753	[0 180 180]	[18 9 10]	4
MIBQAR14	NODTOR	[1 1 1]	[1 1 1]	1.4223	18.2359	18.2359	18.2359	60	60	60	88	-4.595	[0 180 0]	[35 20 13]	3
MIBQAR14	PEVQAK	[1 1 1]	[1 1 1]	1.8189	18.2359	18.2359	18.2359	60	60	60	95	-4.433	[0 180 180]	[20 8 7]	3
MIBQAR14	SAHYOQ02	[1 1 1]	[1 1 1]	1.2108	18.2359	18.2359	18.2359	60	60	60	53	-4.617	[0 180 180]	[26 15 1]	3
MIBQAR14	XUPGOG	[1 1 1]	[1 1 1]	2.144	18.2359	18.2359	18.2359	60	60	60	101	-4.727	[0 0 0]	[9 14 2]	3
MIBQAR15	LAWGEW	[1 1 1]	[1 1 1]	0.7975	18.2344	18.2344	18.2344	60	60	60	55	-4.627	[0 180 180]	[26 15 1]	3
MIBQAR15	MIBQAR01	[1 1 1]	[1 1 1]	1.1032	18.2344	18.2344	18.2344	60	60	60	71	-4.716	[0 180 180]	[18 9 10]	3
MIBQAR15	MIBQAR02	[1 1 1]	[1 1 1]	1.0182	18.2344	18.2344	18.2344	60	60	60	71	-4.719	[0 180 180]	[18 9 10]	3
MIBQAR15	MIBQAR03	[1 1 1]	[1 1 1]	0.8923	18.2344	18.2344	18.2344	60	60	60	72	-4.72	[0 180 180]	[18 9 10]	3
MIBQAR15	MIBQAR04	[1 1 1]	[1 1 1]	0.8482	18.2344	18.2344	18.2344	60	60	60	72	-4.722	[0 180 180]	[18 9 10]	3
MIBQAR15	MIBQAR06	[1 1 1]	[1 1 1]	0.6681	18.2344	18.2344	18.2344	60	60	60	72	-4.731	[0 180 180]	[18 9 10]	3
MIBQAR15	MIBQAR08	[1 1 1]	[1 1 1]	0.5223	18.2344	18.2344	18.2344	60	60	60	73	-4.74	[0 180 180]	[18 9 10]	3
MIBQAR15	MIBQAR14	[1 1 1]	[1 1 1]	0.0247	18.2344	18.2344	18.2344	60	60	60	73	-4.757	[0 180 180]	[18 9 10]	3
MIBQAR15	MIBQAR15	[1 1 1]	[1 1 1]	0	18.2344	18.2344	18.2344	60	60	60	73	-4.756	[0 180 180]	[18 9 10]	4
MIBQAR15	MIBQAR18	[1 1 1]	[1 1 1]	0.2289	18.2344	18.2344	18.2344	60	60	60	74	-4.743	[0 180 180]	[18 9 10]	3
MIBQAR15	NODTIL	[49 49 49]	[50 50 50]	2.9125	893.486	893.486	893.486	60	60	60	121	-4.905	[0 180 180]	[11 15 1]	3
MIBQAR15	NODTOR	[1 1 1]	[1 1 1]	1.3975	18.2344	18.2344	18.2344	60	60	60	88	-4.595	[0 180 0]	[35 20 13]	3
MIBQAR15	PEVPUD	[1 1 1]	[1 1 1]	0.5406	18.2344	18.2344	18.2344	60	60	60	92	-4.332	[0 0 0]	[9 14 2]	3
MIBQAR15	PEVQAK	[1 1 1]	[1 1 1]	1.7941	18.2344	18.2344	18.2344	60	60	60	95	-4.433	[0 180 180]	[20 8 7]	3
MIBQAR15	SAHYIK	[1 1 1]	[1 1 1]	1.3834	18.2344	18.2344	18.2344	60	60	60	57	-4.654	[0 0 0]	[11 15 1]	3
MIBQAR15	SAHYOQ	[1 1 1]	[1 1 1]	1.1309	18.2344	18.2344	18.2344	60	60	60	71	-4.586	[0 0 0]	[3 0 0]	3
MIBQAR15	SAHYOQ02	[1 1 1]	[1 1 1]	1.2354	18.2344	18.2344	18.2344	60	60	60	53	-4.619	[0 180 180]	[26 15 1]	3
MIBQAR15	SAHYOQ03	[1 1 1]	[1 1 1]	0.7975	18.2344	18.2344	18.2344	60	60	60	50	-4.593	[0 180 180]	[9 14 2]	3
MIBQAR15	SAHYOQ04	[1 1 1]	[1 1 1]	1.1636	18.2344	18.2344	18.2344	60	60	60	52	-4.593	[0 180 180]	[9 14 2]	3
MIBQAR15	SAHYOQ05	[1 1 1]	[1 1 1]	1.1636	18.2344	18.2344	18.2344	60	60	60	70	-4.611	[0 180 180]	[26 15 1]	3
MIBQAR15	UNIGEE	[1 1 1]	[1 1 1]	1.5213	18.2344	18.2344	18.2344	60	60	60	72	-4.797	[0 0 0]	[18 12 5]	3
MIBQAR15	VAZTOG	[1 1 1]	[1 1 1]	1.0983	18.2344	18.2344	18.2344	60	60	60	48	-4.594	[0 180 180]	[9 14 2]	3
MIBQAR15	VUSJUP	[1 1 1]	[1 1 1]	2.2165	18.2344	18.2344	18.2344	60	60	60	75	-3.168	[0 180 180]	[0 0 0]	3
MIBQAR15	VUSKAW	[1 1 1]	[1 1 1]	0.2822	18.2344	18.2344	18.2344	60	60	60	71	-4.604	[0 0 0]	[20 8 7]	3
MIBQAR15	VUSKEA	[1 1 1]	[1 1 1]	0.2822	18.2344	18.2344	18.2344	60	60	60	73	-4.644	[0 180 180]	[3 0 0]	3
MIBQAR15	XUPGOG	[1 1 1]	[1 1 1]	2.1191	18.2344	18.2344	18.2344	60	60	60	101	-4.727	[0 0 0]	[9 14 2]	3
MIBQAR16	LAWGEW	[1 1 1]	[1 1 1]	0.9025	18.228	18.228	18.228	60	60	60	55	-4.636	[0 180 180]	[26 15 1]	3
MIBQAR16	LAWGIA	[1 1 1]	[1 1 1]	1.0872	18.228	18.228	18.228	60	60	60	54	-4.633	[0 180 180]	[26 15 1]	3
MIBQAR16	LAWGOG	[1 1 1]	[1 1 1]	1.2832	18.228	18.228	18.228	60	60	60	54	-4.632	[0 180 180]	[26 15 1]	3
MIBQAR16	LAWGUM	[1 1 1]	[1 1 1]	1.3876	18.228	18.228	18.228	60	60	60	53	-4.629	[0 180 180]	[26 15 1]	3
MIBQAR16	MIBQAR01	[1 1 1]	[1 1 1]	1.2081	18.228	18.228	18.228	60	60	60	68	-4.728	[0 180 180]	[18 9 10]	3
MIBQAR16	MIBQAR02	[1 1 1]	[1 1 1]	1.1232	18.228	18.228	18.228	60	60	60	70	-4.732	[0 180 180]	[18 9 10]	3
MIBQAR16	MIBQAR03	[1 1 1]	[1 1 1]	0.9973	18.228	18.228	18.228	60	60	60	70	-4.732	[0 180 180]	[18 9 10]	3
MIBQAR16	MIBQAR04	[1 1 1]	[1 1 1]	0.9532	18.228	18.228	18.228	60	60	60	71	-4.734	[0 180 180]	[18 9 10]	3
MIBQAR16	MIBQAR06	[1 1 1]	[1 1 1]	0.7732	18.228	18.228	18.228	60	60	60	71	-4.744	[0 180 180]	[18 9 10]	3
MIBQAR16	MIBQAR08	[1 1 1]	[1 1 1]	0.6274	18.228	18.228	18.228	60	60	60	72	-4.753	[0 180 180]	[18 9 10]	3
MIBQAR16	MIBQAR11	[1 1 1]	[1 1 1]	0.3731	18.228	18.228	18.228	60	60	60	73	-4.76	[0 180 180]	[18 9 10]	3
MIBQAR16	MIBQAR12	[1 1 1]	[1 1 1]	0.2877	18.228	18.228	18.228	60	60	60	73	-4.762	[0 180 180]	[18 9 10]	3
MIBQAR16	MIBQAR14	[1 1 1]	[1 1 1]	0.13	18.228	18.228	18.228	60	60	60	74	-4.769	[0 180 180]	[18 9 10]	3
MIBQAR16	MIBQAR15	[1 1 1]	[1 1 1]	0.1053	18.228	18.228	18.228	60	60	60	74	-4.769	[0 180 180]	[18 9 10]	3
MIBQAR16	MIBQAR16	[1 1 1]	[1 1 1]	0	18.228	18.228	18.228	60	60	60	73	-4.769	[0 180 180]	[18 9 10]	4
MIBQAR16	MIBQAR18	[1 1 1]	[1 1 1]	0.1235	18.228	18.228	18.228	60	60	60	73	-4.764	[0 180 180]	[18 9 10]	3
MIBQAR16	NODTIL	[50 50 50]	[51 51 51]	2.898	911.4	911.4	911.4	60	60	60	121	-4.908	[0 180 180]	[11 15 1]	3
MIBQAR16	NODTOR	[1 1 1]	[1 1 1]	1.2917	18.228	18.228	18.228	60	60	60	88	-4.596	[0 180 0]	[35 20 13]	3
MIBQAR16	PEVPUD	[1 1 1]	[1 1 1]	0.4351	18.228	18.228	18.228	60	60	60	93	-4.338	[0 0 0]	[9 14 2]	3
MIBQAR16	PEVQAK	[1 1 1]	[1 1 1]	1.6882	18.228	18.228	18.228	60	60	60	96	-4.436	[0 180 180]	[20 8 7]	3
MIBQAR16	SAHYIK	[1 1 1]	[1 1 1]	1.2776	18.228	18.228	18.228	60	60	60	58	-4.654	[0 0 0]	[11 15 1]	3
MIBQAR16	SAHYOQ	[1 1 1]	[1 1 1]	1.2358	18.228	18.228	18.228	60	60	60	72	-4.599	[0 0 0]	[3 0 0]	3
MIBQAR16	SAHYOQ02	[1 1 1]	[1 1 1]	1.3403	18.228	18.228	18.228	60	60	60	54	-4.629	[0 180 180]	[26 15 1]	3
MIBQAR16	SAHYOQ03	[1 1 1]	[1 1 1]	0.9025	18.228	18.228	18.228	60	60	60	50	-4.599	[0 180 180]	[9 14 2]	3
MIBQAR16	SAHYOQ04	[1 1 1]	[1 1 1]	1.2685	18.228	18.228	18.228	60	60	60	52	-4.599	[0 180 180]	[9 14 2]	3
MIBQAR16	SAHYOQ05	[1 1 1]	[1 1 1]	1.2685	18.228	18.228	18.228	60	60	60	71	-4.618	[0 180 180]	[26 15 1]	3
MIBQAR16	UNIGEE	[1 1 1]	[1 1 1]	1.4155	18.228	18.228	18.228	60	60	60	71	-4.81	[0 0 0]	[18 12 5]	3
MIBQAR16	VAZTOG	[1 1 1]	[1 1 1]	1.2032	18.228	18.228	18.228	60	60	60	48	-4.6	[0 180 180]	[9 14 2]	3
MIBQAR16	VUSJUP	[1 1 1]	[1 1 1]	2.1104	18.228	18.228	18.228	60	60	60	76	-3.173	[0 180 180]	[0 0 0]	3
MIBQAR16	VUSKAW	[1 1 1]	[1 1 1]	0.3874	18.228	18.228	18.228	60	60	60	71	-4.614	[0 0 0]	[20 8 7]	3
MIBQAR16	VUSKEA	[1 1 1]	[1 1 1]	0.3874	18.228	18.228	18.228	60	60	60	72	-4.653	[0 180 180]	[3 0 0]	3
MIBQAR16	XUPGOG	[1 1 1]	[1 1 1]	2.0131	18.228	18.228	18.228	60	60	60	99	-4.731	[0 0 0]	[9 14 2]	3
MIBQAR18	MIBQAR01	[1 1 1]	[1 1 1]	1.331	18.2205	18.2205	18.2205	60	60	60	69	-4.746	[0 180 180]	[18 9 10]	3
MIBQAR18	MIBQAR02	[1 1 1]	[1 1 1]	1.2461	18.2205	18.2205	18.2205	60	60	60	70	-4.75	[0 180 180]	[18 9 10]	3
MIBQAR18	MIBQAR04	[1 1 1]	[1 1 1]	1.0762	18.2205	18.2205	18.2205	60	60	60	72	-4.753	[0 180 180]	[18 9 10]	3
MIBQAR18	MIBQAR08	[1 1 1]	[1 1 1]	0.7506	18.2205	18.2205	18.2205	60	60	60	73	-4.771	[0 180 180]	[18 9 10]	3
MIBQAR18	MIBQAR14	[1 1 1]	[1 1 1]	0.2533	18.2205	18.2205	18.2205	60	60	60	74	-4.788	[0 180 180]	[18 9 10]	3
MIBQAR18	MIBQAR18	[1 1 1]	[1 1 1]	0	18.2205	18.2205	18.2205	60	60	60	74	-4.792	[0 180 180]	[18 9 10]	4
MIBQAR18	NODTIL	[1 1 1]	[1 1 1]	2.9194	18.2205	18.2205	18.2205	60	60	60	122	-4.921	[0 180 180]	[11 15 1]	3
MIBQAR18	NODTOR	[1 1 1]	[1 1 1]	1.1677	18.2205	18.2205	18.2205	60	60	60	90	-4.601	[0 180 0]	[35 20 13]	3
MIBQAR18	PEVQAK	[1 1 1]	[1 1 1]	1.5641	18.2205	18.2205	18.2205	60	60	60	96	-4.444	[0 180 180]	[20 8 7]	3
MIBQAR18	SAHYOQ	[1 1 1]	[1 1 1]	1.3588	18.2205	18.2205	18.2205	60	60	60	72	-4.622	[0 0 0]	[3 0 0]	3
MIBQAR18	SAHYOQ02	[1 1 1]	[1 1 1]	1.4632	18.2205	18.2205	18.2205	60	60	60	55	-4.655	[0 180 180]	[26 15 1]	3
MIBQAR18	SAHYOQ03	[1 1 1]	[1 1 1]	1.0255	18.2205	18.2205	18.2205	60	60	60	51	-4.613	[0 180 180]	[26 15 1]	3
MIBQAR18	SAHYOQ05	[1 1 1]	[1 1 1]	1.3914	18.2205	18.2205	18.2205	60	60	60	71	-4.643	[0 180 180]	[26 15 1]	3
MIBQAR18	UNIGEE	[1 1 1]	[1 1 1]	1.2914	18.2205	18.2205	18.2205	60	60	60	72	-4.829	[0 0 0]	[18 12 5]	3
MIBQAR18	VUSKAW	[1 1 1]	[1 1 1]	0.5107	18.2205	18.2205	18.2205	60	60	60	72	-4.64	[0 0 0]	[20 8 7]	3
MIBQAR18	XUPGOG	[1 1 1]	[1 1 1]	1.8888	18.2205	18.2205	18.2205	60	60	60	100	-4.739	[0 0 0]	[9 14 2]	3
MIBQAR19	EDUSIF	[1 1 1]	[1 1 1]	0.8951	18.2115	18.2115	18.2115	60	60	60	72	-4.605	[0 0 0]	[11 15 1]	3
MIBQAR19	LAWGEW	[1 1 1]	[1 1 1]	1.1732	18.2115	18.2115	18.2115	60	60	60	57	-4.673	[0 180 180]	[26 15 1]	3
MIBQAR19	LAWGIA	[1 1 1]	[1 1 1]	1.3578	18.2115	18.2115	18.2115	60	60	60	55	-4.67	[0 180 180]	[26 15 1]	3
MIBQAR19	LAWGOG	[1 1 1]	[1 1 1]	1.5536	18.2115	18.2115	18.2115	60	60	60	54	-4.668	[0 180 180]	[26 15 1]	3
MIBQAR19	LAWGUM	[1 1 1]	[1 1 1]	1.6579	18.2115	18.2115	18.2115	60	60	60	54	-4.665	[0 180 180]	[26 15 1]	3
MIBQAR19	MIBQAR	[1 1 1]	[1 1 1]	1.5862	18.2115	18.2115	18.2115	60	60	60	69	-4.757	[0 180 180]	[18 9 10]	3
MIBQAR19	MIBQAR01	[1 1 1]	[1 1 1]	1.4786	18.2115	18.2115	18.2115	60	60	60	70	-4.761	[0 180 180]	[18 9 10]	3
MIBQAR19	MIBQAR02	[1 1 1]	[1 1 1]	1.3937	18.2115	18.2115	18.2115	60	60	60	71	-4.765	[0 180 180]	[18 9 10]	3
MIBQAR19	MIBQAR03	[1 1 1]	[1 1 1]	1.268	18.2115	18.2115	18.2115	60	60	60	70	-4.767	[0 180 180]	[18 9 10]	3
MIBQAR19	MIBQAR04	[1 1 1]	[1 1 1]	1.2239	18.2115	18.2115	18.2115	60	60	60	72	-4.769	[0 180 180]	[18 9 10]	3
MIBQAR19	MIBQAR05	[1 1 1]	[1 1 1]	1.1062	18.2115	18.2115	18.2115	60	60	60	73	-4.775	[0 180 180]	[18 9 10]	3
MIBQAR19	MIBQAR06	[1 1 1]	[1 1 1]	1.044	18.2115	18.2115	18.2115	60	60	60	76	-4.778	[0 180 180]	[18 9 10]	3
MIBQAR19	MIBQAR08	[1 1 1]	[1 1 1]	0.8984	18.2115	18.2115	18.2115	60	60	60	75	-4.786	[0 180 180]	[18 9 10]	3
MIBQAR19	MIBQAR11	[1 1 1]	[1 1 1]	0.6444	18.2115	18.2115	18.2115	60	60	60	76	-4.794	[0 180 180]	[18 9 10]	3
MIBQAR19	MIBQAR12	[1 1 1]	[1 1 1]	0.559	18.2115	18.2115	18.2115	60	60	60	77	-4.797	[0 180 180]	[18 9 10]	3
MIBQAR19	MIBQAR13	[1 1 1]	[1 1 1]	0.5049	18.2115	18.2115	18.2115	60	60	60	77	-4.801	[0 180 180]	[18 9 10]	3
MIBQAR19	MIBQAR14	[1 1 1]	[1 1 1]	0.4014	18.2115	18.2115	18.2115	60	60	60	77	-4.804	[0 180 180]	[18 9 10]	3
MIBQAR19	MIBQAR15	[1 1 1]	[1 1 1]	0.3768	18.2115	18.2115	18.2115	60	60	60	77	-4.803	[0 180 180]	[18 9 10]	3
MIBQAR19	MIBQAR16	[1 1 1]	[1 1 1]	0.2716	18.2115	18.2115	18.2115	60	60	60	75	-4.804	[0 180 180]	[18 9 10]	3
MIBQAR19	MIBQAR18	[1 1 1]	[1 1 1]	0.1482	18.2115	18.2115	18.2115	60	60	60	76	-4.809	[0 180 180]	[18 9 10]	3
MIBQAR19	MIBQAR19	[1 1 1]	[1 1 1]	0	18.2115	18.2115	18.2115	60	60	60	77	-4.808	[0 180 180]	[18 9 10]	4
MIBQAR19	NODTIL	[1 1 1]	[1 1 1]	2.7698	18.2115	18.2115	18.2115	60	60	60	122	-4.924	[0 180 180]	[11 15 1]	3
MIBQAR19	NODTOR	[1 1 1]	[1 1 1]	1.0189	18.2115	18.2115	18.2115	60	60	60	89	-4.594	[0 180 0]	[35 20 13]	3
MIBQAR19	PEVPUD	[1 1 1]	[1 1 1]	0.1632	18.2115	18.2115	18.2115	60	60	60	97	-4.358	[0 0 0]	[26 15 1]	3
MIBQAR19	PEVQAK	[1 1 1]	[1 1 1]	1.4151	18.2115	18.2115	18.2115	60	60	60	96	-4.447	[0 180 180]	[20 8 7]	3
MIBQAR19	SAHYIK	[1 1 1]	[1 1 1]	1.0049	18.2115	18.2115	18.2115	60	60	60	61	-4.676	[0 0 0]	[11 15 1]	3
MIBQAR19	SAHYOQ	[1 1 1]	[1 1 1]	1.5063	18.2115	18.2115	18.2115	60	60	60	73	-4.646	[0 0 0]	[3 0 0]	3
MIBQAR19	SAHYOQ02	[1 1 1]	[1 1 1]	1.6106	18.2115	18.2115	18.2115	60	60	60	55	-4.665	[0 180 180]	[26 15 1]	3
MIBQAR19	SAHYOQ03	[1 1 1]	[1 1 1]	1.1732	18.2115	18.2115	18.2115	60	60	60	51	-4.63	[0 180 180]	[26 15 1]	3
MIBQAR19	SAHYOQ04	[1 1 1]	[1 1 1]	1.5389	18.2115	18.2115	18.2115	60	60	60	53	-4.616	[0 180 180]	[26 15 1]	3
MIBQAR19	SAHYOQ05	[1 1 1]	[1 1 1]	1.5389	18.2115	18.2115	18.2115	60	60	60	72	-4.65	[0 180 180]	[26 15 1]	3
MIBQAR19	UNIGEE	[1 1 1]	[1 1 1]	1.1426	18.2115	18.2115	18.2115	60	60	60	71	-4.847	[0 0 0]	[18 12 5]	3
MIBQAR19	VAZTOG	[1 1 1]	[1 1 1]	1.4737	18.2115	18.2115	18.2115	60	60	60	51	-4.617	[0 180 180]	[9 14 2]	3
MIBQAR19	VUSJUP	[1 1 1]	[1 1 1]	1.8369	18.2115	18.2115	18.2115	60	60	60	80	-3.194	[0 180 180]	[0 0 0]	3
MIBQAR19	VUSKAW	[1 1 1]	[1 1 1]	0.6586	18.2115	18.2115	18.2115	60	60	60	71	-4.653	[0 0 0]	[20 8 7]	3
MIBQAR19	VUSKEA	[1 1 1]	[1 1 1]	0.6586	18.2115	18.2115	18.2115	60	60	60	74	-4.69	[0 180 180]	[3 0 0]	3
MIBQAR19	XUPGOG	[1 1 1]	[1 1 1]	1.7397	18.2115	18.2115	18.2115	60	60	60	99	-4.743	[0 0 0]	[9 14 2]	3
MUBZOA	MUBZOA	[1 1 1]	[1 1 1]	0	22.071	22.071	22.071	90	90	90	232	-3.142	[0 90 270]	[11 3 1]	4
MUBZUG	MUBZUG	[1 1 1]	[1 1 1]	0	21.983	21.983	21.983	90	90	90	2	-1.706	[0 270 270]	[12 3 2]	4
NIBHOW	NIBHOW	[1 1 1]	[1 1 1]	0	32.9766	32.9766	32.9766	60	60	60	482	-1.533	[0 180 180]	[24 14 15]	4
NIBJAK	NIBJAK	[1 1 1]	[1 1 1]	0	37.4717	37.4717	37.4717	60	60	60	1058	-1.008	[0 0 0]	[33 9 5]	4
NIRZAQ	EDUSIF	[1 1 1]	[1 1 1]	0.2858	18.2486	18.2486	18.2486	60	60	60	68	-4.608	[0 0 0]	[11 15 1]	3
NIRZAQ	HIFTOG01	[1 1 1]	[1 1 1]	2.107	18.2486	18.2486	18.2486	60	60	60	61	-4.491	[0 0 0]	[34 19 14]	3
NIRZAQ	LAWGEW	[1 1 1]	[1 1 1]	0.5645	18.2486	18.2486	18.2486	60	60	60	55	-4.626	[0 180 180]	[26 15 1]	3
NIRZAQ	LAWGIA	[1 1 1]	[1 1 1]	0.7494	18.2486	18.2486	18.2486	60	60	60	56	-4.623	[0 180 180]	[26 15 1]	3
NIRZAQ	LAWGOG	[1 1 1]	[1 1 1]	0.9456	18.2486	18.2486	18.2486	60	60	60	54	-4.621	[0 180 180]	[26 15 1]	3
NIRZAQ	LAWGUM	[1 1 1]	[1 1 1]	1.0501	18.2486	18.2486	18.2486	60	60	60	54	-4.618	[0 180 180]	[26 15 1]	3
NIRZAQ	MIBQAR	[1 1 1]	[1 1 1]	0.9782	18.2486	18.2486	18.2486	60	60	60	72	-4.7	[0 180 180]	[18 9 10]	3
NIRZAQ	MIBQAR01	[1 1 1]	[1 1 1]	0.8704	18.2486	18.2486	18.2486	60	60	60	72	-4.704	[0 180 180]	[18 9 10]	3
NIRZAQ	MIBQAR02	[1 1 1]	[1 1 1]	0.7854	18.2486	18.2486	18.2486	60	60	60	72	-4.708	[0 180 180]	[18 9 10]	3
NIRZAQ	MIBQAR03	[1 1 1]	[1 1 1]	0.6594	18.2486	18.2486	18.2486	60	60	60	73	-4.708	[0 180 180]	[18 9 10]	3
NIRZAQ	MIBQAR04	[1 1 1]	[1 1 1]	0.6152	18.2486	18.2486	18.2486	60	60	60	73	-4.71	[0 180 180]	[18 9 10]	3
NIRZAQ	MIBQAR05	[1 1 1]	[1 1 1]	0.4973	18.2486	18.2486	18.2486	60	60	60	73	-4.716	[0 180 180]	[18 9 10]	3
NIRZAQ	MIBQAR06	[1 1 1]	[1 1 1]	0.435	18.2486	18.2486	18.2486	60	60	60	73	-4.719	[0 180 180]	[18 9 10]	3
NIRZAQ	MIBQAR08	[1 1 1]	[1 1 1]	0.2891	18.2486	18.2486	18.2486	60	60	60	73	-4.728	[0 180 180]	[18 9 10]	3
NIRZAQ	MIBQAR11	[1 1 1]	[1 1 1]	0.0345	18.2486	18.2486	18.2486	60	60	60	73	-4.735	[0 180 180]	[18 9 10]	3
NIRZAQ	MIBQAR12	[1 1 1]	[1 1 1]	0.051	18.2486	18.2486	18.2486	60	60	60	73	-4.733	[0 180 180]	[18 9 10]	3
NIRZAQ	MIBQAR13	[1 1 1]	[1 1 1]	0.1053	18.2486	18.2486	18.2486	60	60	60	73	-4.733	[0 180 180]	[18 9 10]	3
NIRZAQ	MIBQAR14	[1 1 1]	[1 1 1]	0.2089	18.2486	18.2486	18.2486	60	60	60	73	-4.727	[0 180 180]	[18 9 10]	3
NIRZAQ	MIBQAR15	[1 1 1]	[1 1 1]	0.2336	18.2486	18.2486	18.2486	60	60	60	73	-4.725	[0 180 180]	[18 9 10]	3
NIRZAQ	MIBQAR16	[1 1 1]	[1 1 1]	0.339	18.2486	18.2486	18.2486	60	60	60	73	-4.716	[0 180 180]	[18 9 10]	3
NIRZAQ	MIBQAR18	[1 1 1]	[1 1 1]	0.4627	18.2486	18.2486	18.2486	60	60	60	73	-4.711	[0 180 180]	[18 9 10]	3
NIRZAQ	MIBQAR19	[1 1 1]	[1 1 1]	0.6112	18.2486	18.2486	18.2486	60	60	60	74	-4.717	[0 0 0]	[17 10 5]	3
NIRZAQ	NIRZAQ	[1 1 1]	[1 1 1]	0	18.2486	18.2486	18.2486	60	60	60	74	-4.716	[0 0 0]	[26 15 1]	4
NIRZAQ	NODTIL	[47 47 47]	[48 48 48]	2.934	857.684	857.684	857.684	60	60	60	121	-4.913	[0 180 180]	[11 15 1]	3
NIRZAQ	NODTOR	[1 1 1]	[1 1 1]	1.6322	18.2486	18.2486	18.2486	60	60	60	87	-4.6	[0 180 0]	[35 20 13]	3
NIRZAQ	PEVPUD	[1 1 1]	[1 1 1]	0.7747	18.2486	18.2486	18.2486	60	60	60	94	-4.334	[0 0 0]	[26 15 1]	3
NIRZAQ	PEVQAK	[1 1 1]	[1 1 1]	2.0291	18.2486	18.2486	18.2486	60	60	60	97	-4.433	[0 180 180]	[20 8 7]	3
NIRZAQ	PEVQEO	[1 1 1]	[1 1 1]	2.6352	18.2486	18.2486	18.2486	60	60	60	74	-4.821	[0 180 180]	[3 0 0]	3
NIRZAQ	SAHYIK	[1 1 1]	[1 1 1]	1.6181	18.2486	18.2486	18.2486	60	60	60	58	-4.685	[0 0 0]	[11 15 1]	3
NIRZAQ	SAHYOQ	[1 1 1]	[1 1 1]	0.8982	18.2486	18.2486	18.2486	60	60	60	70	-4.599	[0 0 0]	[11 15 1]	3
NIRZAQ	SAHYOQ02	[1 1 1]	[1 1 1]	1.0027	18.2486	18.2486	18.2486	60	60	60	54	-4.618	[0 180 180]	[26 15 1]	3
NIRZAQ	SAHYOQ03	[1 1 1]	[1 1 1]	0.5645	18.2486	18.2486	18.2486	60	60	60	51	-4.589	[0 180 180]	[9 14 2]	3
NIRZAQ	SAHYOQ04	[1 1 1]	[1 1 1]	0.9309	18.2486	18.2486	18.2486	60	60	60	53	-4.588	[0 180 180]	[9 14 2]	3
NIRZAQ	SAHYOQ05	[1 1 1]	[1 1 1]	0.9309	18.2486	18.2486	18.2486	60	60	60	72	-4.616	[0 180 180]	[26 15 1]	3
NIRZAQ	UNIGEE	[1 1 1]	[1 1 1]	1.7561	18.2486	18.2486	18.2486	60	60	60	74	-4.784	[0 0 0]	[18 12 5]	3
NIRZAQ	VAZTOG	[1 1 1]	[1 1 1]	0.8655	18.2486	18.2486	18.2486	60	60	60	50	-4.59	[0 180 180]	[9 14 2]	3
NIRZAQ	VUSJUP	[1 1 1]	[1 1 1]	2.4518	18.2486	18.2486	18.2486	60	60	60	73	-3.17	[0 180 180]	[0 0 0]	3
NIRZAQ	VUSKAW	[1 1 1]	[1 1 1]	0.0488	18.2486	18.2486	18.2486	60	60	60	72	-4.606	[0 0 0]	[20 8 7]	3
NIRZAQ	VUSKEA	[1 1 1]	[1 1 1]	0.0488	18.2486	18.2486	18.2486	60	60	60	76	-4.656	[0 180 180]	[3 0 0]	3
NIRZAQ	XUPGOG	[1 1 1]	[1 1 1]	2.3544	18.2486	18.2486	18.2486	60	60	60	103	-4.729	[0 0 0]	[9 14 2]	3
NODTEH	EDUSIF	[49 49 49]	[48 48 48]	2.9689	885.445	885.445	885.445	60	60	60	53	-4.675	[0 180 180]	[1 0 0]	3
NODTEH	HIFTOG01	[1 42 37]	[1 41 36]	2.0705	18.0703	758.953	668.601	60	60	60	35	-4.667	[0 0 0]	[17 10 7]	3
NODTEH	LAWGEW	[47 47 47]	[46 46 46]	2.9557	849.304	849.304	849.304	60	60	60	33	-4.662	[0 0 0]	[27 6 14]	3
NODTEH	LAWGIA	[46 46 46]	[45 45 45]	2.9118	831.234	831.234	831.234	60	60	60	34	-4.657	[0 0 0]	[27 6 14]	3
NODTEH	LAWGOG	[45 45 45]	[44 44 44]	2.8628	813.163	813.163	813.163	60	60	60	34	-4.651	[0 0 0]	[27 6 14]	3
NODTEH	LAWGUM	[44 44 44]	[43 43 43]	2.9134	795.093	795.093	795.093	60	60	60	33	-4.65	[0 0 0]	[27 6 14]	3
NODTEH	MIBQAR	[44 44 44]	[43 43 43]	2.9862	795.093	795.093	795.093	60	60	60	55	-4.736	[0 180 180]	[18 9 10]	3
NODTEH	MIBQAR01	[45 45 45]	[44 44 44]	2.9389	813.163	813.163	813.163	60	60	60	55	-4.749	[0 180 180]	[18 9 10]	3
NODTEH	MIBQAR02	[46 46 46]	[45 45 45]	2.8753	831.234	831.234	831.234	60	60	60	55	-4.76	[0 180 180]	[18 9 10]	3
NODTEH	MIBQAR03	[47 47 47]	[46 46 46]	2.8597	849.304	849.304	849.304	60	60	60	55	-4.764	[0 180 180]	[18 9 10]	3
NODTEH	MIBQAR04	[47 47 47]	[46 46 46]	2.9044	849.304	849.304	849.304	60	60	60	55	-4.775	[0 180 180]	[18 9 10]	3
NODTEH	MIBQAR05	[48 48 48]	[47 47 47]	2.8865	867.374	867.374	867.374	60	60	60	55	-4.788	[0 180 180]	[18 9 10]	3
NODTEH	MIBQAR06	[48 48 48]	[47 47 47]	2.9495	867.374	867.374	867.374	60	60	60	57	-4.796	[0 180 180]	[18 9 10]	3
NODTEH	MIBQAR07	[49 49 49]	[48 48 48]	2.8959	885.445	885.445	885.445	60	60	60	57	-4.804	[0 180 180]	[18 9 10]	3
NODTEH	MIBQAR08	[49 49 49]	[48 48 48]	2.9656	885.445	885.445	885.445	60	60	60	58	-4.813	[0 180 180]	[18 9 10]	3
NODTEH	MIBQAR10	[51 51 51]	[50 50 50]	2.904	921.585	921.585	921.585	60	60	60	58	-4.832	[0 180 180]	[18 9 10]	3
NODTEH	MIBQAR11	[1 1 1]	[1 1 1]	2.9654	18.0703	18.0703	18.0703	60	60	60	58	-4.838	[0 180 180]	[18 9 10]	3
NODTEH	MIBQAR12	[1 1 1]	[1 1 1]	2.8807	18.0703	18.0703	18.0703	60	60	60	58	-4.844	[0 180 180]	[18 9 10]	3
NODTEH	MIBQAR13	[1 1 1]	[1 1 1]	2.827	18.0703	18.0703	18.0703	60	60	60	58	-4.85	[0 180 180]	[18 9 10]	3
NODTEH	MIBQAR14	[1 1 1]	[1 1 1]	2.7243	18.0703	18.0703	18.0703	60	60	60	58	-4.861	[0 180 180]	[18 9 10]	3
NODTEH	MIBQAR15	[1 1 1]	[1 1 1]	2.6998	18.0703	18.0703	18.0703	60	60	60	58	-4.863	[0 180 180]	[18 9 10]	3
NODTEH	MIBQAR16	[1 1 1]	[1 1 1]	2.5955	18.0703	18.0703	18.0703	60	60	60	58	-4.87	[0 180 180]	[18 9 10]	3
NODTEH	MIBQAR18	[1 1 1]	[1 1 1]	2.473	18.0703	18.0703	18.0703	60	60	60	58	-4.885	[0 180 180]	[18 9 10]	3
NODTEH	MIBQAR19	[1 1 1]	[1 1 1]	2.326	18.0703	18.0703	18.0703	60	60	60	62	-4.894	[0 180 180]	[18 9 10]	3
NODTEH	NIRZAQ	[1 1 1]	[1 1 1]	2.9312	18.0703	18.0703	18.0703	60	60	60	58	-4.799	[0 180 180]	[15 0 0]	3
NODTEH	NODTEH	[1 1 1]	[1 1 1]	0	18.0703	18.0703	18.0703	60	60	60	57	-4.774	[0 180 180]	[11 5 14]	4
NODTEH	NODTIL	[1 1 1]	[1 1 1]	0.4223	18.0703	18.0703	18.0703	60	60	60	88	-4.795	[0 0 0]	[19 9 6]	3
NODTEH	NODTOR	[1 1 1]	[1 1 1]	1.315	18.0703	18.0703	18.0703	60	60	60	64	-4.714	[0 180 0]	[17 9 6]	3
NODTEH	PEVPUD	[1 1 1]	[1 1 1]	2.1641	18.0703	18.0703	18.0703	60	60	60	73	-4.467	[0 180 180]	[18 11 7]	3
NODTEH	PEVQAK	[1 1 1]	[1 1 1]	0.9219	18.0703	18.0703	18.0703	60	60	60	67	-4.406	[0 180 180]	[19 9 6]	3
NODTEH	PEVQEO	[1 1 1]	[1 1 1]	0.3217	18.0703	18.0703	18.0703	60	60	60	47	-4.753	[0 0 0]	[19 9 6]	3
NODTEH	SAHYIK	[1 1 1]	[1 1 1]	1.3289	18.0703	18.0703	18.0703	60	60	60	44	-4.767	[0 180 180]	[19 9 6]	3
NODTEH	SAHYOQ	[45 45 45]	[44 44 44]	2.9107	813.163	813.163	813.163	60	60	60	55	-4.688	[0 180 180]	[0 0 0]	3
NODTEH	SAHYOQ02	[44 44 44]	[43 43 43]	2.9614	795.093	795.093	795.093	60	60	60	34	-4.65	[0 0 0]	[27 6 14]	3
NODTEH	SAHYOQ03	[47 47 47]	[46 46 46]	2.9557	849.304	849.304	849.304	60	60	60	29	-4.645	[0 0 0]	[27 6 14]	3
NODTEH	SAHYOQ04	[45 45 45]	[44 44 44]	2.8777	813.163	813.163	813.163	60	60	60	29	-4.645	[0 0 0]	[27 6 14]	3
NODTEH	SAHYOQ05	[45 45 45]	[44 44 44]	2.8777	813.163	813.163	813.163	60	60	60	52	-4.723	[0 0 0]	[26 7 14]	3
NODTEH	UNIGEE	[1 1 1]	[1 1 1]	1.1922	18.0703	18.0703	18.0703	60	60	60	45	-4.923	[0 180 180]	[18 9 10]	3
NODTEH	VAZTOG	[45 45 45]	[44 44 44]	2.9439	813.163	813.163	813.163	60	60	60	27	-4.643	[0 0 0]	[27 6 14]	3
NODTEH	VUSJUP	[1 1 1]	[1 1 1]	0.5033	18.0703	18.0703	18.0703	60	60	60	57	-3.13	[0 180 180]	[17 0 0]	3
NODTEH	VUSKAW	[1 1 51]	[1 1 50]	2.9577	18.0703	18.0703	921.585	60	60	60	46	-4.699	[0 0 0]	[19 9 6]	3
NODTEH	VUSKEA	[1 1 51]	[1 1 50]	2.9577	18.0703	18.0703	921.585	60	60	60	52	-4.84	[0 0 0]	[3 0 0]	3
NODTEH	XUPGOG	[1 1 1]	[1 1 1]	0.5998	18.0703	18.0703	18.0703	60	60	60	61	-4.723	[0 0 0]	[9 13 1]	3
NODTIL	MIBQAR14	[50 50 50]	[49 49 49]	2.9162	902.245	902.245	902.245	60	60	60	74	-4.999	[0 180 180]	[18 9 10]	3
NODTIL	NODTIL	[1 1 1]	[1 1 1]	0	18.0449	18.0449	18.0449	60	60	60	105	-5.122	[0 0 0]	[3 0 0]	4
NODTIL	NODTOR	[1 1 1]	[1 1 1]	1.7348	18.0449	18.0449	18.0449	60	60	60	85	-4.668	[0 180 0]	[17 9 6]	3
NODTIL	PEVQAK	[1 1 1]	[1 1 1]	1.3423	18.0449	18.0449	18.0449	60	60	60	87	-4.836	[0 180 180]	[0 0 0]	3
NODTIL	SAHYOQ	[42 42 42]	[41 41 41]	2.9768	757.886	757.886	757.886	60	60	60	64	-5.083	[0 180 180]	[0 0 0]	3
NODTIL	SAHYOQ02	[42 42 42]	[41 41 41]	2.8709	757.886	757.886	757.886	60	60	60	51	-4.769	[0 180 180]	[9 15 0]	3
NODTIL	XUPGOG	[1 1 1]	[1 1 1]	1.0206	18.0449	18.0449	18.0449	60	60	60	87	-4.837	[0 0 0]	[9 14 2]	3
ODIXEG	ODIXEG	[1 1 1]	[1 1 1]	0	12.706	12.706	23.817	90	90	90	12	-6.57	[0 180 0]	[11 6 21]	4
PEVPUD	LAWGEW	[1 1 1]	[1 1 1]	1.3357	18.2016	18.2016	18.2016	60	60	60	69	-4.437	[0 180 180]	[9 2 5]	3
PEVPUD	MIBQAR01	[1 1 1]	[1 1 1]	1.6408	18.2016	18.2016	18.2016	60	60	60	83	-4.46	[0 0 0]	[9 5 0]	3
PEVPUD	MIBQAR02	[1 1 1]	[1 1 1]	1.556	18.2016	18.2016	18.2016	60	60	60	83	-4.469	[0 0 0]	[9 5 0]	3
PEVPUD	MIBQAR03	[1 1 1]	[1 1 1]	1.4304	18.2016	18.2016	18.2016	60	60	60	79	-4.437	[0 0 0]	[9 5 0]	3
PEVPUD	MIBQAR04	[1 1 1]	[1 1 1]	1.3863	18.2016	18.2016	18.2016	60	60	60	82	-4.457	[0 0 0]	[9 5 0]	3
PEVPUD	MIBQAR06	[1 1 1]	[1 1 1]	1.2066	18.2016	18.2016	18.2016	60	60	60	84	-4.492	[0 0 0]	[9 5 0]	3
PEVPUD	MIBQAR08	[1 1 1]	[1 1 1]	1.061	18.2016	18.2016	18.2016	60	60	60	85	-4.522	[0 0 0]	[9 5 0]	3
PEVPUD	MIBQAR14	[1 1 1]	[1 1 1]	0.5643	18.2016	18.2016	18.2016	60	60	60	85	-4.538	[0 0 0]	[9 5 0]	3
PEVPUD	MIBQAR18	[1 1 1]	[1 1 1]	0.3112	18.2016	18.2016	18.2016	60	60	60	85	-4.53	[0 0 0]	[9 5 0]	3
PEVPUD	NODTIL	[1 1 1]	[1 1 1]	2.6052	18.2016	18.2016	18.2016	60	60	60	130	-4.875	[0 180 180]	[11 4 5]	3
PEVPUD	NODTOR	[1 1 1]	[1 1 1]	0.8553	18.2016	18.2016	18.2016	60	60	60	103	-4.592	[0 0 180]	[9 7 5]	3
PEVPUD	PEVPUD	[1 1 1]	[1 1 1]	0	18.2016	18.2016	18.2016	60	60	60	100	-4.244	[0 180 180]	[29 18 11]	4
PEVPUD	PEVQAK	[1 1 1]	[1 1 1]	1.2512	18.2016	18.2016	18.2016	60	60	60	99	-4.433	[0 180 180]	[29 13 11]	3
PEVPUD	SAHYIK	[1 1 1]	[1 1 1]	0.8413	18.2016	18.2016	18.2016	60	60	60	70	-4.738	[0 180 180]	[29 13 11]	3
PEVPUD	SAHYOQ	[1 1 1]	[1 1 1]	1.6685	18.2016	18.2016	18.2016	60	60	60	81	-4.667	[0 180 180]	[29 13 11]	3
PEVPUD	SAHYOQ02	[1 1 1]	[1 1 1]	1.7728	18.2016	18.2016	18.2016	60	60	60	70	-4.435	[0 180 180]	[9 2 5]	3
PEVPUD	SAHYOQ03	[1 1 1]	[1 1 1]	1.3357	18.2016	18.2016	18.2016	60	60	60	62	-4.397	[0 180 180]	[9 2 5]	3
PEVPUD	SAHYOQ04	[1 1 1]	[1 1 1]	1.7011	18.2016	18.2016	18.2016	60	60	60	68	-4.396	[0 180 180]	[9 2 5]	3
PEVPUD	SAHYOQ05	[1 1 1]	[1 1 1]	1.7011	18.2016	18.2016	18.2016	60	60	60	82	-4.422	[0 180 180]	[9 2 5]	3
PEVPUD	UNIGEE	[1 1 1]	[1 1 1]	0.9789	18.2016	18.2016	18.2016	60	60	60	78	-4.459	[0 0 0]	[9 5 0]	3
PEVPUD	VAZTOG	[1 1 1]	[1 1 1]	1.6359	18.2016	18.2016	18.2016	60	60	60	60	-4.4	[0 180 180]	[9 2 5]	3
PEVPUD	VUSJUP	[1 1 1]	[1 1 1]	1.6729	18.2016	18.2016	18.2016	60	60	60	89	-3.098	[0 180 180]	[26 13 11]	3
PEVPUD	VUSKAW	[1 1 1]	[1 1 1]	0.8214	18.2016	18.2016	18.2016	60	60	60	79	-4.727	[0 0 0]	[29 13 11]	3
PEVPUD	VUSKEA	[1 1 1]	[1 1 1]	0.8214	18.2016	18.2016	18.2016	60	60	60	81	-4.728	[0 0 0]	[29 13 11]	3
PEVPUD	XAMDUM04	[1 1 1]	[1 1 1]	2.3791	18.2016	18.2016	18.2016	60	60	60	1	-6.356	[0 0 0]	[27 10 8]	1
PEVPUD	XUPGOG	[1 1 1]	[1 1 1]	1.5757	18.2016	18.2016	18.2016	60	60	60	117	-4.476	[0 0 0]	[9 2 5]	3
PEVQAK	PEVQAK	[1 1 1]	[1 1 1]	0	18.126	18.126	18.126	60	60	60	93	-4.262	[0 180 180]	[9 5 4]	4
PEVQAK	SAHYOQ02	[51 51 51]	[50 50 50]	2.9283	924.426	924.426	924.426	60	60	60	65	-4.456	[0 180 180]	[9 5 4]	3
PEVQEO	EDUSIF	[1 1 1]	[1 1 1]	2.8955	18.0897	18.0897	18.0897	60	60	60	74	-5.143	[0 180 180]	[0 0 0]	3
PEVQEO	HIFTOG01	[1 44 39]	[1 43 38]	1.954	18.0897	795.947	705.498	60	60	60	61	-4.638	[0 0 0]	[15 0 0]	3
PEVQEO	LAWGEW	[50 50 50]	[49 49 49]	2.8859	904.485	904.485	904.485	60	60	60	59	-4.818	[0 0 0]	[18 0 0]	3
PEVQEO	LAWGIA	[48 48 48]	[47 47 47]	2.9564	868.306	868.306	868.306	60	60	60	58	-4.789	[0 0 0]	[18 0 0]	3
PEVQEO	LAWGOG	[47 47 47]	[46 46 46]	2.895	850.216	850.216	850.216	60	60	60	57	-4.758	[0 0 0]	[18 0 0]	3
PEVQEO	LAWGUM	[46 46 46]	[45 45 45]	2.9323	832.126	832.126	832.126	60	60	60	57	-4.737	[0 180 180]	[18 0 0]	3
PEVQEO	MIBQAR	[47 47 47]	[46 46 46]	2.8619	850.216	850.216	850.216	60	60	60	78	-4.926	[0 0 0]	[18 0 0]	3
PEVQEO	MIBQAR01	[47 47 47]	[46 46 46]	2.9711	850.216	850.216	850.216	60	60	60	78	-4.932	[0 0 0]	[18 0 0]	3
PEVQEO	MIBQAR02	[48 48 48]	[47 47 47]	2.92	868.306	868.306	868.306	60	60	60	78	-4.941	[0 0 0]	[18 0 0]	3
PEVQEO	MIBQAR03	[49 49 49]	[48 48 48]	2.916	886.395	886.395	886.395	60	60	60	77	-4.948	[0 0 0]	[18 0 0]	3
PEVQEO	MIBQAR04	[49 49 49]	[48 48 48]	2.9608	886.395	886.395	886.395	60	60	60	78	-4.957	[0 0 0]	[18 0 0]	3
PEVQEO	MIBQAR05	[50 50 50]	[49 49 49]	2.9539	904.485	904.485	904.485	60	60	60	78	-4.967	[0 0 0]	[18 0 0]	3
PEVQEO	MIBQAR06	[51 51 51]	[50 50 50]	2.8956	922.575	922.575	922.575	60	60	60	81	-4.976	[0 0 0]	[18 0 0]	3
PEVQEO	MIBQAR08	[1 1 1]	[1 1 1]	2.8988	18.0897	18.0897	18.0897	60	60	60	84	-4.987	[0 0 0]	[18 0 0]	3
PEVQEO	MIBQAR11	[1 1 1]	[1 1 1]	2.6465	18.0897	18.0897	18.0897	60	60	60	84	-5.007	[0 0 0]	[18 0 0]	3
PEVQEO	MIBQAR12	[1 1 1]	[1 1 1]	2.5617	18.0897	18.0897	18.0897	60	60	60	85	-5.011	[0 0 0]	[18 0 0]	3
PEVQEO	MIBQAR13	[1 1 1]	[1 1 1]	2.5079	18.0897	18.0897	18.0897	60	60	60	84	-5.012	[0 0 0]	[18 0 0]	3
PEVQEO	MIBQAR14	[1 1 1]	[1 1 1]	2.4051	18.0897	18.0897	18.0897	60	60	60	85	-5.024	[0 0 0]	[18 0 0]	3
PEVQEO	MIBQAR15	[1 1 1]	[1 1 1]	2.3807	18.0897	18.0897	18.0897	60	60	60	85	-5.026	[0 0 0]	[18 0 0]	3
PEVQEO	MIBQAR16	[1 1 1]	[1 1 1]	2.2762	18.0897	18.0897	18.0897	60	60	60	85	-5.032	[0 0 0]	[18 0 0]	3
PEVQEO	MIBQAR18	[1 1 1]	[1 1 1]	2.1536	18.0897	18.0897	18.0897	60	60	60	85	-5.045	[0 0 0]	[18 0 0]	3
PEVQEO	MIBQAR19	[1 1 1]	[1 1 1]	2.0064	18.0897	18.0897	18.0897	60	60	60	85	-5.055	[0 0 0]	[18 0 0]	3
PEVQEO	NODTIL	[1 1 1]	[1 1 1]	0.7448	18.0897	18.0897	18.0897	60	60	60	122	-5.098	[0 0 0]	[0 0 0]	3
PEVQEO	NODTOR	[1 1 1]	[1 1 1]	0.9943	18.0897	18.0897	18.0897	60	60	60	95	-4.677	[0 0 180]	[16 11 7]	3
PEVQEO	PEVPUD	[1 1 1]	[1 1 1]	1.8443	18.0897	18.0897	18.0897	60	60	60	98	-4.862	[0 180 180]	[18 0 0]	3
PEVQEO	PEVQAK	[1 1 1]	[1 1 1]	0.6008	18.0897	18.0897	18.0897	60	60	60	91	-4.878	[0 180 180]	[0 0 0]	3
PEVQEO	PEVQEO	[1 1 1]	[1 1 1]	0	18.0897	18.0897	18.0897	60	60	60	76	-5.204	[0 0 0]	[0 0 0]	4
PEVQEO	SAHYIK	[1 1 1]	[1 1 1]	1.0082	18.0897	18.0897	18.0897	60	60	60	65	-5.177	[0 180 180]	[0 0 0]	3
PEVQEO	SAHYOQ	[47 47 47]	[46 46 46]	2.943	850.216	850.216	850.216	60	60	60	75	-5.119	[0 180 180]	[0 0 0]	3
PEVQEO	SAHYOQ02	[46 46 46]	[45 45 45]	2.9803	832.126	832.126	832.126	60	60	60	57	-4.753	[0 0 0]	[18 0 0]	3
PEVQEO	SAHYOQ03	[50 50 50]	[49 49 49]	2.8859	904.485	904.485	904.485	60	60	60	54	-4.695	[0 0 0]	[18 11 7]	3
PEVQEO	SAHYOQ04	[47 47 47]	[46 46 46]	2.9099	850.216	850.216	850.216	60	60	60	54	-4.709	[0 180 180]	[9 15 0]	3
PEVQEO	SAHYOQ05	[47 47 47]	[46 46 46]	2.9099	850.216	850.216	850.216	60	60	60	73	-4.853	[0 0 0]	[18 0 0]	3
PEVQEO	UNIGEE	[1 1 1]	[1 1 1]	0.8714	18.0897	18.0897	18.0897	60	60	60	67	-4.94	[0 0 0]	[0 0 0]	3
PEVQEO	VAZTOG	[47 47 47]	[46 46 46]	2.9761	850.216	850.216	850.216	60	60	60	52	-4.696	[0 0 0]	[18 11 7]	3
PEVQEO	VUSJUP	[1 1 1]	[1 1 1]	0.1818	18.0897	18.0897	18.0897	60	60	60	81	-3.375	[0 180 180]	[0 0 0]	3
PEVQEO	VUSKAW	[1 1 1]	[1 1 1]	2.6606	18.0897	18.0897	18.0897	60	60	60	76	-5.141	[0 0 0]	[0 0 0]	3
PEVQEO	VUSKEA	[1 1 1]	[1 1 1]	2.6606	18.0897	18.0897	18.0897	60	60	60	78	-5.108	[0 0 0]	[0 0 0]	3
PEVQEO	XUPGOG	[1 1 1]	[1 1 1]	0.2784	18.0897	18.0897	18.0897	60	60	60	99	-4.835	[0 0 0]	[0 0 0]	3
PEVQIS	PEVQIS	[1 1 1]	[1 1 1]	0	25.654	25.654	25.654	90	90	90	4083	-5.13	[0 90 270]	[9 0 0]	4
PEVQIS	PEVQOY	[1 1 1]	[1 1 1]	1.3037	25.654	25.654	25.654	90	90	90	3764	-5.215	[0 270 180]	[13 13 0]	3
PEVQOY	PEVQOY	[1 1 1]	[1 1 1]	0	25.543	25.543	25.543	90	90	90	4071	-5.198	[0 0 90]	[13 13 13]	4
PIBNUK	PIBPIA	[43 43 43]	[42 42 42]	2.8962	1102.58	1102.58	1102.58	90	90	90	3102	-1.313	[0 180 0]	[16 19 3]	1
PIBNUK01	PIBNUK	[1 1 1]	[1 1 1]	0.0772	25.6349	25.6349	25.6349	90	90	90	3963	-1.444	[0 180 90]	[13 3 22]	4
PIYZAZ	PIYZAZ	[1 1 1]	[1 1 1]	0	8.995	8.995	8.995	60	60	60	32	-8.325	[0 180 180]	[11 9 6]	4
QIYDIN	QIYDIN	[1 1 1]	[1 1 1]	0	34.346	34.346	34.346	90	90	90	10	-1.085	[0 270 90]	[23 17 0]	4
QOFLAA	QOFLAA	[1 1 1]	[1 1 1]	0	15.7211	15.7211	15.7211	70.1062	71.3706	109.894	2	-6.763	[0 0 0]	[12 1 1]	4
RONZID	RONZID	[1 1 1]	[1 1 1]	0	9.042	9.042	12.027	90	90	90	83	-7.205	[0 180 0]	[7 2 3]	4
RUTNOK	RUTNOK	[1 1 1]	[1 1 1]	0	42.9245	42.9245	42.9245	90	90	90	28512	-2.457	[90 180 90]	[25 25 0]	4
RUTNOK	VEJHEZ	[1 1 1]	[1 1 1]	0.7355	42.9245	42.9245	42.9245	90	90	90	319	-6.206	[0 270 0]	[21 32 0]	1
SAHYIK	MIBQAR01	[1 1 1]	[1 1 1]	2.4752	18.1507	18.1507	18.1507	60	60	60	64	-4.85	[0 180 180]	[18 9 10]	3
SAHYIK	MIBQAR02	[1 1 1]	[1 1 1]	2.3906	18.1507	18.1507	18.1507	60	60	60	65	-4.855	[0 180 180]	[18 9 10]	3
SAHYIK	MIBQAR03	[1 1 1]	[1 1 1]	2.2653	18.1507	18.1507	18.1507	60	60	60	63	-4.856	[0 180 180]	[18 9 10]	3
SAHYIK	MIBQAR04	[1 1 1]	[1 1 1]	2.2214	18.1507	18.1507	18.1507	60	60	60	65	-4.861	[0 180 180]	[18 9 10]	3
SAHYIK	MIBQAR06	[1 1 1]	[1 1 1]	2.0421	18.1507	18.1507	18.1507	60	60	60	65	-4.872	[0 180 180]	[18 9 10]	3
SAHYIK	MIBQAR08	[1 1 1]	[1 1 1]	1.8969	18.1507	18.1507	18.1507	60	60	60	65	-4.883	[0 180 180]	[18 9 10]	3
SAHYIK	MIBQAR14	[1 1 1]	[1 1 1]	1.4016	18.1507	18.1507	18.1507	60	60	60	66	-4.906	[0 180 180]	[18 9 10]	3
SAHYIK	MIBQAR18	[1 1 1]	[1 1 1]	1.1493	18.1507	18.1507	18.1507	60	60	60	67	-4.915	[0 180 180]	[18 9 10]	3
SAHYIK	NODTIL	[1 1 1]	[1 1 1]	1.7589	18.1507	18.1507	18.1507	60	60	60	109	-4.908	[0 0 0]	[3 0 0]	3
SAHYIK	NODTOR	[1 1 1]	[1 1 1]	0.014	18.1507	18.1507	18.1507	60	60	60	78	-4.643	[0 180 0]	[16 9 6]	3
SAHYIK	PEVQAK	[1 1 1]	[1 1 1]	0.4088	18.1507	18.1507	18.1507	60	60	60	84	-4.493	[0 180 180]	[20 8 7]	3
SAHYIK	SAHYIK	[1 1 1]	[1 1 1]	0	18.1507	18.1507	18.1507	60	60	60	54	-4.723	[0 180 180]	[21 10 7]	4
SAHYIK	SAHYOQ	[1 1 1]	[1 1 1]	2.5028	18.1507	18.1507	18.1507	60	60	60	67	-4.609	[0 180 180]	[21 10 7]	3
SAHYIK	SAHYOQ02	[1 1 1]	[1 1 1]	2.6068	18.1507	18.1507	18.1507	60	60	60	42	-4.657	[0 0 0]	[19 13 7]	3
SAHYIK	SAHYOQ03	[1 1 1]	[1 1 1]	2.1709	18.1507	18.1507	18.1507	60	60	60	42	-4.659	[0 180 180]	[9 14 2]	3
SAHYIK	SAHYOQ04	[1 1 1]	[1 1 1]	2.5353	18.1507	18.1507	18.1507	60	60	60	42	-4.659	[0 180 180]	[9 14 2]	3
SAHYIK	SAHYOQ05	[1 1 1]	[1 1 1]	2.5353	18.1507	18.1507	18.1507	60	60	60	65	-4.689	[0 180 180]	[9 14 2]	3
SAHYIK	UNIGEE	[1 1 1]	[1 1 1]	0.1372	18.1507	18.1507	18.1507	60	60	60	59	-4.943	[0 0 0]	[18 12 5]	3
SAHYIK	VAZTOG	[1 1 1]	[1 1 1]	2.4703	18.1507	18.1507	18.1507	60	60	60	40	-4.647	[0 180 180]	[9 14 2]	3
SAHYIK	VUSJUP	[1 1 1]	[1 1 1]	0.8292	18.1507	18.1507	18.1507	60	60	60	78	-3.161	[0 0 0]	[0 0 0]	3
SAHYIK	VUSKAW	[1 1 1]	[1 1 1]	1.658	18.1507	18.1507	18.1507	60	60	60	62	-4.692	[0 0 0]	[19 19 14]	3
SAHYIK	VUSKEA	[1 1 1]	[1 1 1]	1.658	18.1507	18.1507	18.1507	60	60	60	64	-4.713	[0 0 0]	[20 8 7]	3
SAHYIK	XUPGOG	[1 1 1]	[1 1 1]	0.7323	18.1507	18.1507	18.1507	60	60	60	80	-4.773	[0 0 0]	[9 14 2]	3
SAHYOQ	MIBQAR04	[1 1 1]	[1 1 1]	0.2838	18.3034	18.3034	18.3034	60	60	60	64	-4.608	[0 0 0]	[17 10 5]	3
SAHYOQ	MIBQAR14	[1 1 1]	[1 1 1]	1.1104	18.3034	18.3034	18.3034	60	60	60	64	-4.64	[0 0 0]	[17 10 5]	3
SAHYOQ	NODTOR	[1 1 1]	[1 1 1]	2.538	18.3034	18.3034	18.3034	60	60	60	76	-4.483	[0 180 0]	[35 20 13]	3
SAHYOQ	PEVQAK	[1 1 1]	[1 1 1]	2.9361	18.3034	18.3034	18.3034	60	60	60	94	-4.356	[0 180 180]	[20 8 7]	3
SAHYOQ	SAHYOQ	[1 1 1]	[1 1 1]	0	18.3034	18.3034	18.3034	60	60	60	62	-4.467	[0 180 180]	[11 6 14]	4
SAHYOQ	SAHYOQ02	[1 1 1]	[1 1 1]	0.1049	18.3034	18.3034	18.3034	60	60	60	48	-4.502	[0 180 180]	[9 14 2]	3
SAHYOQ	XUPGOG	[48 48 48]	[49 49 49]	2.9267	878.563	878.563	878.563	60	60	60	92	-4.632	[0 0 0]	[9 14 2]	3
SAHYOQ02	SAHYOQ02	[1 1 1]	[1 1 1]	0	18.3098	18.3098	18.3098	60	60	60	53	-4.565	[0 180 180]	[0 0 0]	4
SAHYOQ03	MIBQAR04	[1 1 1]	[1 1 1]	0.0509	18.283	18.283	18.283	60	60	60	62	-4.551	[0 0 0]	[17 10 5]	3
SAHYOQ03	MIBQAR14	[1 1 1]	[1 1 1]	0.7748	18.283	18.283	18.283	60	60	60	60	-4.579	[0 0 0]	[17 10 5]	3
SAHYOQ03	NODTOR	[1 1 1]	[1 1 1]	2.2008	18.283	18.283	18.283	60	60	60	75	-4.527	[0 180 0]	[35 20 13]	3
SAHYOQ03	PEVQAK	[1 1 1]	[1 1 1]	2.5985	18.283	18.283	18.283	60	60	60	90	-4.365	[0 180 180]	[11 13 0]	3
SAHYOQ03	SAHYOQ	[1 1 1]	[1 1 1]	0.3344	18.283	18.283	18.283	60	60	60	60	-4.449	[0 0 0]	[0 0 0]	3
SAHYOQ03	SAHYOQ02	[1 1 1]	[1 1 1]	0.4391	18.283	18.283	18.283	60	60	60	49	-4.493	[0 180 180]	[9 14 2]	3
SAHYOQ03	SAHYOQ03	[1 1 1]	[1 1 1]	0	18.283	18.283	18.283	60	60	60	44	-4.498	[0 180 180]	[9 14 2]	4
SAHYOQ03	SAHYOQ05	[1 1 1]	[1 1 1]	0.3671	18.283	18.283	18.283	60	60	60	65	-4.497	[0 180 180]	[9 14 2]	3
SAHYOQ03	UNIGEE	[1 1 1]	[1 1 1]	2.3249	18.283	18.283	18.283	60	60	60	55	-4.644	[0 0 0]	[17 10 5]	3
SAHYOQ03	XUPGOG	[1 1 1]	[1 1 1]	2.9244	18.283	18.283	18.283	60	60	60	87	-4.591	[0 0 0]	[9 14 2]	3
SAHYOQ04	MIBQAR01	[1 1 1]	[1 1 1]	0.0607	18.3054	18.3054	18.3054	60	60	60	60	-4.566	[0 0 0]	[0 0 0]	3
SAHYOQ04	MIBQAR02	[1 1 1]	[1 1 1]	0.1459	18.3054	18.3054	18.3054	60	60	60	59	-4.569	[0 0 0]	[0 0 0]	3
SAHYOQ04	MIBQAR04	[1 1 1]	[1 1 1]	0.3166	18.3054	18.3054	18.3054	60	60	60	59	-4.57	[0 0 0]	[0 0 0]	3
SAHYOQ04	MIBQAR06	[1 1 1]	[1 1 1]	0.4974	18.3054	18.3054	18.3054	60	60	60	59	-4.578	[0 0 0]	[0 0 0]	3
SAHYOQ04	MIBQAR08	[1 1 1]	[1 1 1]	0.6438	18.3054	18.3054	18.3054	60	60	60	59	-4.582	[0 0 0]	[0 0 0]	3
SAHYOQ04	MIBQAR14	[1 1 1]	[1 1 1]	1.1433	18.3054	18.3054	18.3054	60	60	60	59	-4.59	[0 0 0]	[0 0 0]	3
SAHYOQ04	MIBQAR18	[1 1 1]	[1 1 1]	1.3979	18.3054	18.3054	18.3054	60	60	60	58	-4.596	[0 0 0]	[0 0 0]	3
SAHYOQ04	NODTIL	[41 41 41]	[42 42 42]	2.9151	750.521	750.521	750.521	60	60	60	115	-4.616	[0 0 0]	[11 6 14]	3
SAHYOQ04	NODTOR	[1 1 1]	[1 1 1]	2.571	18.3054	18.3054	18.3054	60	60	60	77	-4.51	[0 180 0]	[35 20 13]	3
SAHYOQ04	PEVQAK	[1 1 1]	[1 1 1]	2.9692	18.3054	18.3054	18.3054	60	60	60	89	-4.401	[0 180 180]	[11 13 0]	3
SAHYOQ04	SAHYOQ	[1 1 1]	[1 1 1]	0.0328	18.3054	18.3054	18.3054	60	60	60	63	-4.432	[0 0 0]	[0 0 0]	3
SAHYOQ04	SAHYOQ02	[1 1 1]	[1 1 1]	0.0721	18.3054	18.3054	18.3054	60	60	60	49	-4.477	[0 180 180]	[9 14 2]	3
SAHYOQ04	SAHYOQ03	[1 1 1]	[1 1 1]	0.3676	18.3054	18.3054	18.3054	60	60	60	45	-4.474	[0 180 180]	[9 14 2]	3
SAHYOQ04	SAHYOQ04	[1 1 1]	[1 1 1]	0	18.3054	18.3054	18.3054	60	60	60	47	-4.483	[0 180 180]	[9 14 2]	4
SAHYOQ04	SAHYOQ05	[1 1 1]	[1 1 1]	0	18.3054	18.3054	18.3054	60	60	60	68	-4.535	[0 180 180]	[0 0 0]	3
SAHYOQ04	UNIGEE	[1 1 1]	[1 1 1]	2.6953	18.3054	18.3054	18.3054	60	60	60	56	-4.646	[0 0 0]	[17 10 5]	3
SAHYOQ04	VUSJUP	[47 47 47]	[48 48 48]	2.9275	860.354	860.354	860.354	60	60	60	61	-2.99	[0 0 0]	[17 1 2]	3
SAHYOQ04	VUSKAW	[1 1 1]	[1 1 1]	0.8848	18.3054	18.3054	18.3054	60	60	60	64	-4.614	[0 180 180]	[3 0 0]	3
SAHYOQ04	VUSKEA	[1 1 1]	[1 1 1]	0.8848	18.3054	18.3054	18.3054	60	60	60	70	-4.613	[0 180 180]	[0 0 0]	3
SAHYOQ04	XUPGOG	[48 48 48]	[49 49 49]	2.8942	878.659	878.659	878.659	60	60	60	90	-4.568	[0 0 0]	[9 14 2]	3
SAHYOQ05	MIBQAR04	[1 1 1]	[1 1 1]	0.3166	18.3054	18.3054	18.3054	60	60	60	66	-4.695	[0 0 0]	[0 0 0]	3
SAHYOQ05	MIBQAR14	[1 1 1]	[1 1 1]	1.1433	18.3054	18.3054	18.3054	60	60	60	66	-4.723	[0 0 0]	[0 0 0]	3
SAHYOQ05	NODTOR	[1 1 1]	[1 1 1]	2.571	18.3054	18.3054	18.3054	60	60	60	89	-4.51	[0 180 0]	[35 20 13]	3
SAHYOQ05	PEVQAK	[1 1 1]	[1 1 1]	2.9692	18.3054	18.3054	18.3054	60	60	60	96	-4.588	[0 0 0]	[0 0 0]	3
SAHYOQ05	SAHYOQ	[1 1 1]	[1 1 1]	0.0328	18.3054	18.3054	18.3054	60	60	60	73	-4.618	[0 0 0]	[0 0 0]	3
SAHYOQ05	SAHYOQ02	[1 1 1]	[1 1 1]	0.0721	18.3054	18.3054	18.3054	60	60	60	60	-4.66	[0 180 180]	[0 0 0]	3
SAHYOQ05	SAHYOQ05	[1 1 1]	[1 1 1]	0	18.3054	18.3054	18.3054	60	60	60	79	-4.764	[0 180 180]	[0 0 0]	4
SAHYOQ05	UNIGEE	[1 1 1]	[1 1 1]	2.6953	18.3054	18.3054	18.3054	60	60	60	62	-4.77	[0 0 0]	[0 0 0]	3
SEMNIJ	SEMNIJ	[1 1 1]	[1 1 1]	0	48.5825	48.5825	48.5825	60	60	60	5	-0.971	[0 180 180]	[68 45 22]	4
SENWIT	VEHJID01	[31 1 1]	[30 1 1]	1.9513	392.522	14.662	15.434	90	90	90	119	-8.26	[0 180 0]	[2 9 6]	4
SUKYIH	SUKYIH	[1 1 1]	[1 1 1]	0	12.248	12.248	22.8767	90	90	90	17	-8.58	[0 0 90]	[11 6 14]	4
TEQPEM	VEBHUG	[1 1 1]	[3 3 1]	0.1337	20.627	20.627	20.627	60	60	60	72	-2.593	[0 180 0]	[0 0 0]	1
TOVGAO	JOZWIG02	[1 1 1]	[1 1 1]	0.1516	25.3468	25.3468	25.3468	90	90	90	88	-2.817	[90 0 90]	[21 1 12]	1
TOVGAO	TOVGAO	[1 1 1]	[1 1 1]	0	25.3468	25.3468	25.3468	90	90	90	55	-2.591	[90 180 270]	[3 24 13]	4
UNIGEE	MIBQAR04	[1 1 1]	[1 1 1]	2.3575	18.1424	18.1424	18.1424	60	60	60	61	-4.819	[0 180 180]	[18 9 10]	3
UNIGEE	MIBQAR14	[1 1 1]	[1 1 1]	1.5382	18.1424	18.1424	18.1424	60	60	60	66	-4.858	[0 180 180]	[18 12 9]	3
UNIGEE	NODTIL	[1 1 1]	[1 1 1]	1.621	18.1424	18.1424	18.1424	60	60	60	106	-4.859	[0 180 180]	[0 0 0]	3
UNIGEE	NODTOR	[1 1 1]	[1 1 1]	0.1232	18.1424	18.1424	18.1424	60	60	60	81	-4.603	[0 180 0]	[16 10 7]	3
UNIGEE	PEVQAK	[1 1 1]	[1 1 1]	0.2714	18.1424	18.1424	18.1424	60	60	60	81	-4.743	[0 180 180]	[0 0 0]	3
UNIGEE	SAHYOQ	[1 1 1]	[1 1 1]	2.6389	18.1424	18.1424	18.1424	60	60	60	61	-4.995	[0 180 180]	[0 0 0]	3
UNIGEE	SAHYOQ02	[1 1 1]	[1 1 1]	2.7428	18.1424	18.1424	18.1424	60	60	60	49	-4.655	[0 0 0]	[18 11 7]	3
UNIGEE	UNIGEE	[1 1 1]	[1 1 1]	0	18.1424	18.1424	18.1424	60	60	60	57	-4.845	[0 180 180]	[17 11 10]	4
UNIGEE	XUPGOG	[1 1 1]	[1 1 1]	0.5948	18.1424	18.1424	18.1424	60	60	60	84	-4.794	[0 0 0]	[9 14 2]	3
UQOFOX	VEHJOJ	[24 1 1]	[23 1 1]	1.1833	477.72	20.55	20.55	90	90	90	16	-5.159	[90 0 180]	[10 10 19]	2
UQOFOX	VEHJUP	[23 1 1]	[22 1 1]	1.5778	457.815	20.55	20.55	90	90	90	17	-5.348	[0 0 180]	[10 19 10]	1
VAZTOG	MIBQAR01	[1 1 1]	[1 1 1]	0.0049	18.3014	18.3014	18.3014	60	60	60	59	-4.521	[0 0 0]	[0 0 0]	3
VAZTOG	MIBQAR02	[1 1 1]	[1 1 1]	0.0803	18.3014	18.3014	18.3014	60	60	60	58	-4.524	[0 0 0]	[0 0 0]	3
VAZTOG	MIBQAR03	[1 1 1]	[1 1 1]	0.2067	18.3014	18.3014	18.3014	60	60	60	56	-4.52	[0 0 0]	[0 0 0]	3
VAZTOG	MIBQAR04	[1 1 1]	[1 1 1]	0.251	18.3014	18.3014	18.3014	60	60	60	58	-4.524	[0 0 0]	[0 0 0]	3
VAZTOG	MIBQAR06	[1 1 1]	[1 1 1]	0.4317	18.3014	18.3014	18.3014	60	60	60	58	-4.533	[0 0 0]	[0 0 0]	3
VAZTOG	MIBQAR08	[1 1 1]	[1 1 1]	0.5781	18.3014	18.3014	18.3014	60	60	60	59	-4.537	[0 0 0]	[0 0 0]	3
VAZTOG	MIBQAR14	[1 1 1]	[1 1 1]	1.0775	18.3014	18.3014	18.3014	60	60	60	56	-4.544	[0 0 0]	[0 0 0]	3
VAZTOG	MIBQAR18	[1 1 1]	[1 1 1]	1.332	18.3014	18.3014	18.3014	60	60	60	57	-4.55	[0 0 0]	[0 0 0]	3
VAZTOG	NODTIL	[41 41 41]	[42 42 42]	2.98	750.357	750.357	750.357	60	60	60	112	-4.576	[0 0 0]	[11 6 14]	3
VAZTOG	NODTOR	[1 1 1]	[1 1 1]	2.5049	18.3014	18.3014	18.3014	60	60	60	74	-4.511	[0 180 0]	[35 20 13]	3
VAZTOG	PEVQAK	[1 1 1]	[1 1 1]	2.903	18.3014	18.3014	18.3014	60	60	60	87	-4.353	[0 180 180]	[11 13 0]	3
VAZTOG	SAHYOQ	[1 1 1]	[1 1 1]	0.0328	18.3014	18.3014	18.3014	60	60	60	58	-4.376	[0 0 0]	[0 0 0]	3
VAZTOG	SAHYOQ02	[1 1 1]	[1 1 1]	0.1376	18.3014	18.3014	18.3014	60	60	60	46	-4.483	[0 180 180]	[9 14 2]	3
VAZTOG	SAHYOQ03	[1 1 1]	[1 1 1]	0.3019	18.3014	18.3014	18.3014	60	60	60	41	-4.478	[0 180 180]	[9 14 2]	3
VAZTOG	SAHYOQ04	[1 1 1]	[1 1 1]	0.0656	18.3014	18.3014	18.3014	60	60	60	43	-4.489	[0 180 180]	[9 14 2]	3
VAZTOG	SAHYOQ05	[1 1 1]	[1 1 1]	0.0656	18.3014	18.3014	18.3014	60	60	60	60	-4.494	[0 180 180]	[9 14 2]	3
VAZTOG	UNIGEE	[1 1 1]	[1 1 1]	2.6292	18.3014	18.3014	18.3014	60	60	60	53	-4.626	[0 0 0]	[17 10 5]	3
VAZTOG	VAZTOG	[1 1 1]	[1 1 1]	0	18.3014	18.3014	18.3014	60	60	60	41	-4.481	[0 180 180]	[9 14 2]	4
VAZTOG	VUSJUP	[47 47 48]	[48 48 49]	2.9494	860.166	860.166	878.467	60	60	60	56	-2.992	[0 180 180]	[35 20 13]	3
VAZTOG	VUSKAW	[1 1 1]	[1 1 1]	0.8191	18.3014	18.3014	18.3014	60	60	60	61	-4.566	[0 180 180]	[3 0 0]	3
VAZTOG	VUSKEA	[1 1 1]	[1 1 1]	0.8191	18.3014	18.3014	18.3014	60	60	60	65	-4.568	[0 180 180]	[0 0 0]	3
VAZTOG	XUPGOG	[48 48 48]	[49 49 49]	2.9591	878.467	878.467	878.467	60	60	60	88	-4.571	[0 0 0]	[9 14 2]	3
VEBHUG	VEBHUG	[1 1 1]	[1 1 1]	0	29.184	29.184	29.184	90	90	90	34599	-3.852	[0, 0, 180]	[1, 1, 1]	4
VETSUK	HEXVEM	[1 1 1]	[1 1 1]	1.2227	35.2288	35.2288	35.2288	60	60	60	15	-1.983	[0 0 0]	[27 26 7]	1
VETTAR	HEXVEM	[1 1 1]	[1 1 1]	0.7567	35.1743	35.1743	35.1743	60	60	60	17	-1.958	[0 0 0]	[27 26 7]	1
VUSJUP	MIBQAR01	[49 49 49]	[48 48 48]	2.886	886.949	886.949	886.949	60.0036	60.0036	60.0001	68	-3.16	[0 180 180]	[18 9 10]	3
VUSJUP	MIBQAR02	[49 49 49]	[48 48 48]	2.9721	886.949	886.949	886.949	60.0036	60.0036	60.0001	68	-3.164	[0 180 180]	[18 9 10]	3
VUSJUP	MIBQAR04	[51 51 51]	[50 50 50]	2.897	923.151	923.151	923.151	60.0036	60.0036	60.0001	70	-3.167	[0 180 180]	[18 9 10]	3
VUSJUP	MIBQAR06	[1 1 1]	[1 1 1]	2.8635	18.101	18.101	18.101	60.0036	60.0036	60.0001	70	-3.176	[0 180 180]	[18 9 10]	3
VUSJUP	MIBQAR08	[1 1 1]	[1 1 1]	2.7187	18.101	18.101	18.101	60.0036	60.0036	60.0001	71	-3.184	[0 180 180]	[18 9 10]	3
VUSJUP	MIBQAR14	[1 1 1]	[1 1 1]	2.2247	18.101	18.101	18.101	60.0036	60.0036	60.0001	73	-3.196	[0 180 180]	[18 9 10]	3
VUSJUP	MIBQAR18	[1 1 1]	[1 1 1]	1.973	18.101	18.101	18.101	60.0036	60.0036	60.0001	76	-3.199	[0 180 180]	[18 9 10]	3
VUSJUP	NODTIL	[1 1 1]	[1 1 1]	0.9271	18.101	18.101	18.101	60.0036	60.0036	60.0001	123	-3.309	[0 0 0]	[0 0 0]	3
VUSJUP	NODTOR	[1 1 1]	[1 1 1]	0.813	18.101	18.101	18.101	60.0036	60.0036	60.0001	100	-3.104	[0 0 180]	[16 12 9]	3
VUSJUP	PEVQAK	[1 1 1]	[1 1 1]	0.4193	18.101	18.101	18.101	60.0036	60.0036	60.0001	106	-3.05	[0 180 180]	[0 0 0]	3
VUSJUP	SAHYOQ	[48 48 49]	[47 47 48]	2.9456	868.848	868.848	886.949	60.0036	60.0036	60.0001	86	-3.278	[0 180 180]	[0 0 0]	3
VUSJUP	SAHYOQ02	[48 48 48]	[47 47 47]	2.8835	868.848	868.848	868.848	60.0036	60.0036	60.0001	47	-3.102	[0 180 180]	[26 15 1]	3
VUSJUP	SAHYOQ03	[51 51 1]	[50 50 1]	2.9483	923.151	923.151	18.101	60.0036	60.0036	60.0001	45	-3.104	[0 0 0]	[0 0 0]	3
VUSJUP	SAHYOQ05	[48 48 48]	[47 47 47]	2.9563	868.848	868.848	868.848	60.0036	60.0036	60.0001	69	-3.144	[0 180 180]	[26 15 1]	3
VUSJUP	UNIGEE	[1 1 1]	[1 1 1]	0.6901	18.101	18.101	18.101	60.0036	60.0036	60.0001	63	-3.257	[0 180 180]	[17 11 10]	3
VUSJUP	VUSJUP	[1 1 1]	[1 1 1]	0	18.101	18.101	18.101	60.0036	60.0036	60.0001	176	-2.462	[0 0 0]	[19 3 2]	4
VUSJUP	VUSKAW	[1 1 1]	[1 1 1]	2.4804	18.101	18.101	18.101	60.0036	60.0036	60.0001	81	-3.169	[0 0 0]	[11 13 0]	3
VUSJUP	VUSKEA	[1 1 1]	[1 1 1]	2.4804	18.101	18.101	18.101	60.0036	60.0036	60.0001	83	-3.185	[0 180 180]	[3 0 0]	3
VUSJUP	XUPGOG	[1 1 1]	[1 1 1]	0.0966	18.101	18.101	18.101	60.0036	60.0036	60.0001	83	-3.12	[0 180 180]	[17 13 7]	3
VUSKAW	MIBQAR04	[1 1 1]	[1 1 1]	0.5665	18.2519	18.2519	18.252	60.0037	60.0037	60.0005	59	-4.677	[0 180 180]	[32 17 10]	3
VUSKAW	MIBQAR08	[1 1 1]	[1 1 1]	0.2403	18.2519	18.2519	18.252	60.0037	60.0037	60.0005	63	-4.698	[0 180 180]	[32 17 10]	3
VUSKAW	MIBQAR14	[1 1 1]	[1 1 1]	0.2578	18.2519	18.2519	18.252	60.0037	60.0037	60.0005	61	-4.714	[0 180 180]	[32 17 10]	3
VUSKAW	NODTIL	[47 47 46]	[48 48 47]	2.9305	857.839	857.839	839.592	60.0037	60.0037	60.0005	119	-4.714	[0 180 180]	[15 9 2]	3
VUSKAW	NODTOR	[1 1 1]	[1 1 1]	1.6813	18.2519	18.2519	18.252	60.0037	60.0037	60.0005	89	-4.666	[0 0 180]	[12 9 2]	3
VUSKAW	PEVQAK	[1 1 1]	[1 1 1]	2.0783	18.2519	18.2519	18.252	60.0037	60.0037	60.0005	85	-4.57	[0 180 180]	[17 8 0]	3
VUSKAW	SAHYOQ	[1 1 1]	[1 1 1]	0.8495	18.2519	18.2519	18.252	60.0037	60.0037	60.0005	67	-4.565	[0 0 0]	[14 8 0]	3
VUSKAW	SAHYOQ02	[1 1 1]	[1 1 1]	0.9541	18.2519	18.2519	18.252	60.0037	60.0037	60.0005	52	-4.496	[0 0 0]	[23 15 13]	3
VUSKAW	SAHYOQ03	[1 1 1]	[1 1 1]	0.5157	18.2519	18.2519	18.252	60.0037	60.0037	60.0005	46	-4.483	[0 0 0]	[23 15 13]	3
VUSKAW	SAHYOQ05	[1 1 1]	[1 1 1]	0.8822	18.2519	18.2519	18.252	60.0037	60.0037	60.0005	68	-4.513	[0 0 0]	[23 15 13]	3
VUSKAW	UNIGEE	[1 1 1]	[1 1 1]	1.8052	18.2519	18.2519	18.252	60.0037	60.0037	60.0005	56	-4.765	[0 180 180]	[32 17 10]	3
VUSKAW	VUSKAW	[1 1 1]	[1 1 1]	0	18.2519	18.2519	18.252	60.0037	60.0037	60.0005	72	-4.669	[0 180 180]	[14 8 0]	4
VUSKAW	XUPGOG	[1 1 1]	[1 1 1]	2.4036	18.2519	18.2519	18.252	60.0037	60.0037	60.0005	97	-4.678	[0 180 180]	[24 14 14]	3
VUSKEA	MIBQAR01	[1 1 1]	[1 1 1]	0.8217	18.2519	18.2519	18.252	60.0037	60.0037	60.0005	60	-4.692	[0 180 180]	[32 17 10]	3
VUSKEA	MIBQAR02	[1 1 1]	[1 1 1]	0.7367	18.2519	18.2519	18.252	60.0037	60.0037	60.0005	62	-4.696	[0 180 180]	[32 17 10]	3
VUSKEA	MIBQAR04	[1 1 1]	[1 1 1]	0.5665	18.2519	18.2519	18.252	60.0037	60.0037	60.0005	60	-4.7	[0 180 180]	[32 17 10]	3
VUSKEA	MIBQAR06	[1 1 1]	[1 1 1]	0.3863	18.2519	18.2519	18.252	60.0037	60.0037	60.0005	63	-4.711	[0 180 180]	[32 17 10]	3
VUSKEA	MIBQAR08	[1 1 1]	[1 1 1]	0.2403	18.2519	18.2519	18.252	60.0037	60.0037	60.0005	65	-4.72	[0 180 180]	[32 17 10]	3
VUSKEA	MIBQAR14	[1 1 1]	[1 1 1]	0.2578	18.2519	18.2519	18.252	60.0037	60.0037	60.0005	64	-4.735	[0 180 180]	[32 17 10]	3
VUSKEA	MIBQAR18	[1 1 1]	[1 1 1]	0.5116	18.2519	18.2519	18.252	60.0037	60.0037	60.0005	64	-4.741	[0 180 180]	[32 17 10]	3
VUSKEA	NODTIL	[47 47 46]	[48 48 47]	2.9305	857.839	857.839	839.592	60.0037	60.0037	60.0005	119	-4.73	[0 180 180]	[15 9 2]	3
VUSKEA	NODTOR	[1 1 1]	[1 1 1]	1.6813	18.2519	18.2519	18.252	60.0037	60.0037	60.0005	89	-4.685	[0 0 180]	[12 9 2]	3
VUSKEA	PEVQAK	[1 1 1]	[1 1 1]	2.0783	18.2519	18.2519	18.252	60.0037	60.0037	60.0005	89	-4.548	[0 0 0]	[17 8 0]	3
VUSKEA	SAHYOQ	[1 1 1]	[1 1 1]	0.8495	18.2519	18.2519	18.252	60.0037	60.0037	60.0005	71	-4.556	[0 0 0]	[14 8 0]	3
VUSKEA	SAHYOQ02	[1 1 1]	[1 1 1]	0.9541	18.2519	18.2519	18.252	60.0037	60.0037	60.0005	53	-4.497	[0 0 0]	[23 15 13]	3
VUSKEA	SAHYOQ03	[1 1 1]	[1 1 1]	0.5157	18.2519	18.2519	18.252	60.0037	60.0037	60.0005	46	-4.483	[0 0 0]	[23 15 13]	3
VUSKEA	SAHYOQ05	[1 1 1]	[1 1 1]	0.8822	18.2519	18.2519	18.252	60.0037	60.0037	60.0005	69	-4.511	[0 0 0]	[23 15 13]	3
VUSKEA	UNIGEE	[1 1 1]	[1 1 1]	1.8052	18.2519	18.2519	18.252	60.0037	60.0037	60.0005	58	-4.796	[0 180 180]	[32 17 10]	3
VUSKEA	VUSKAW	[1 1 1]	[1 1 1]	0	18.2519	18.2519	18.252	60.0037	60.0037	60.0005	76	-4.664	[0 180 180]	[14 8 0]	3
VUSKEA	VUSKEA	[1 1 1]	[1 1 1]	0	18.2519	18.2519	18.252	60.0037	60.0037	60.0005	77	-4.639	[0 180 180]	[14 8 0]	4
VUSKEA	XUPGOG	[1 1 1]	[1 1 1]	2.4036	18.2519	18.2519	18.252	60.0037	60.0037	60.0005	98	-4.699	[0 180 180]	[24 14 14]	3
WUHCUZ	WUHCUZ	[1 1 1]	[1 1 1]	0	27.9293	27.9293	27.9293	90	90	90	1735	-1.632	[90 180 0]	[3 25 14]	4
WUHDAG	WUHDAG	[1 1 1]	[1 1 1]	0	28.9202	28.9202	28.9202	90	90	90	1299	-1.023	[0 270 90]	[14 6 2]	4
XAFFUH	XAFFUH	[1 1 1]	[1 1 1]	0	24.087	36.3295	36.3295	90	90	90	47	-1.54	[0 180 180]	[6 11 18]	4
XAHPUT	XAHPUT	[1 1 1]	[1 1 1]	0	30.9492	30.9492	45.9136	70.3035	70.3035	89.9999	80	-0.515	[0 0 0]	[1 30 2]	4
XAHPUT	XAHQAA	[1 1 1]	[1 1 1]	1.8029	30.9492	30.9492	45.9136	70.3035	70.3035	89.9999	60	-0.5	[0 0 180]	[30 32 21]	3
XAMDUM04	PEVQAK	[45 45 45]	[46 46 46]	2.9419	825.62	825.62	825.62	60	60	60	1	-6.485	[0 0 0]	[20 12 8]	2
XIGWUF	XIGWUF	[1 1 1]	[1 1 1]	0	13.5285	13.5285	14.277	61.7197	61.7197	60	20	-3.66	[0 0 0]	[11 4 2]	4
XOGQOB	XOGQOB	[1 1 1]	[1 1 1]	0	36.4789	36.4789	36.4789	90	90	90	2931	-3.122	[0 90 90]	[15 4 13]	4
XUKYEI	XUKYEI	[1 1 1]	[1 1 1]	0	17.3335	17.3335	23.8297	68.6727	68.6727	89.9999	20	-2.812	[0 180 0]	[13 17 9]	4
XUPGOG	EDUSIF	[1 1 1]	[1 1 1]	2.6196	18.1065	18.1065	18.1065	60	60	60	54	-4.904	[0 180 180]	[0 0 0]	3
XUPGOG	HIFTOG01	[1 46 40]	[1 45 39]	2.0659	18.1065	832.899	724.26	60	60	60	42	-4.533	[0 0 0]	[26 5 14]	3
XUPGOG	LAWGEW	[1 1 1]	[1 1 1]	2.8961	18.1065	18.1065	18.1065	60	60	60	44	-4.647	[0 0 0]	[18 11 7]	3
XUPGOG	LAWGIA	[50 50 50]	[49 49 49]	2.98	905.325	905.325	905.325	60	60	60	42	-4.635	[0 0 0]	[18 11 7]	3
XUPGOG	LAWGOG	[49 49 49]	[48 48 48]	2.9075	887.218	887.218	887.218	60	60	60	42	-4.621	[0 0 0]	[18 11 7]	3
XUPGOG	LAWGUM	[48 48 48]	[47 47 47]	2.9331	869.112	869.112	869.112	60	60	60	42	-4.614	[0 180 180]	[9 15 0]	3
XUPGOG	MIBQAR	[49 49 49]	[48 48 48]	2.8744	887.218	887.218	887.218	60	60	60	54	-4.81	[0 180 180]	[18 9 10]	3
XUPGOG	MIBQAR01	[49 49 49]	[48 48 48]	2.9836	887.218	887.218	887.218	60	60	60	55	-4.823	[0 180 180]	[18 9 10]	3
XUPGOG	MIBQAR02	[50 50 50]	[49 49 49]	2.9435	905.325	905.325	905.325	60	60	60	55	-4.833	[0 180 180]	[18 9 10]	3
XUPGOG	MIBQAR03	[1 1 1]	[1 1 1]	2.9904	18.1065	18.1065	18.1065	60	60	60	53	-4.826	[0 180 180]	[18 9 10]	3
XUPGOG	MIBQAR04	[1 1 1]	[1 1 1]	2.9465	18.1065	18.1065	18.1065	60	60	60	53	-4.846	[0 180 180]	[18 9 10]	3
XUPGOG	MIBQAR05	[1 1 1]	[1 1 1]	2.8295	18.1065	18.1065	18.1065	60	60	60	56	-4.855	[0 180 180]	[18 9 10]	3
XUPGOG	MIBQAR06	[1 1 1]	[1 1 1]	2.7677	18.1065	18.1065	18.1065	60	60	60	57	-4.862	[0 180 180]	[18 9 10]	3
XUPGOG	MIBQAR07	[1 1 1]	[1 1 1]	2.6912	18.1065	18.1065	18.1065	60	60	60	57	-4.865	[0 180 180]	[18 9 10]	3
XUPGOG	MIBQAR08	[1 1 1]	[1 1 1]	2.6229	18.1065	18.1065	18.1065	60	60	60	60	-4.87	[0 180 180]	[18 9 10]	3
XUPGOG	MIBQAR10	[1 1 1]	[1 1 1]	2.4404	18.1065	18.1065	18.1065	60	60	60	61	-4.88	[0 180 180]	[18 9 10]	3
XUPGOG	MIBQAR11	[1 1 1]	[1 1 1]	2.3703	18.1065	18.1065	18.1065	60	60	60	61	-4.883	[0 180 180]	[18 9 10]	3
XUPGOG	MIBQAR12	[1 1 1]	[1 1 1]	2.2855	18.1065	18.1065	18.1065	60	60	60	61	-4.883	[0 180 180]	[18 9 10]	3
XUPGOG	MIBQAR13	[1 1 1]	[1 1 1]	2.2316	18.1065	18.1065	18.1065	60	60	60	61	-4.887	[0 180 180]	[18 9 10]	3
XUPGOG	MIBQAR14	[1 1 1]	[1 1 1]	2.1288	18.1065	18.1065	18.1065	60	60	60	61	-4.893	[0 180 180]	[18 9 10]	3
XUPGOG	MIBQAR15	[1 1 1]	[1 1 1]	2.1043	18.1065	18.1065	18.1065	60	60	60	61	-4.894	[0 180 180]	[18 9 10]	3
XUPGOG	MIBQAR16	[1 1 1]	[1 1 1]	1.9997	18.1065	18.1065	18.1065	60	60	60	61	-4.894	[0 180 180]	[18 9 10]	3
XUPGOG	MIBQAR18	[1 1 1]	[1 1 1]	1.877	18.1065	18.1065	18.1065	60	60	60	62	-4.906	[0 180 180]	[18 9 10]	3
XUPGOG	MIBQAR19	[1 1 1]	[1 1 1]	1.7297	18.1065	18.1065	18.1065	60	60	60	60	-4.904	[0 180 180]	[18 9 10]	3
XUPGOG	NIRZAQ	[1 1 1]	[1 1 1]	2.3361	18.1065	18.1065	18.1065	60	60	60	57	-4.92	[0 180 180]	[15 0 0]	3
XUPGOG	NODTIL	[1 1 1]	[1 1 1]	1.0241	18.1065	18.1065	18.1065	60	60	60	98	-4.732	[0 0 0]	[0 0 0]	3
XUPGOG	NODTOR	[1 1 1]	[1 1 1]	0.7166	18.1065	18.1065	18.1065	60	60	60	71	-4.612	[0 180 0]	[16 10 7]	3
XUPGOG	PEVPUD	[1 1 1]	[1 1 1]	1.5674	18.1065	18.1065	18.1065	60	60	60	86	-4.711	[0 180 180]	[18 0 0]	3
XUPGOG	PEVQAK	[1 1 1]	[1 1 1]	0.3227	18.1065	18.1065	18.1065	60	60	60	76	-4.662	[0 180 180]	[0 0 0]	3
XUPGOG	PEVQEO	[1 1 1]	[1 1 1]	0.2786	18.1065	18.1065	18.1065	60	60	60	55	-4.915	[0 0 0]	[3 0 0]	3
XUPGOG	SAHYIK	[1 1 1]	[1 1 1]	0.7306	18.1065	18.1065	18.1065	60	60	60	48	-4.718	[0 180 180]	[3 0 0]	3
XUPGOG	SAHYOQ	[49 49 49]	[48 48 48]	2.9555	887.218	887.218	887.218	60	60	60	54	-4.91	[0 180 180]	[0 0 0]	3
XUPGOG	SAHYOQ02	[48 48 48]	[47 47 47]	2.9811	869.112	869.112	869.112	60	60	60	41	-4.62	[0 0 0]	[18 11 7]	3
XUPGOG	SAHYOQ03	[1 1 1]	[1 1 1]	2.8961	18.1065	18.1065	18.1065	60	60	60	38	-4.695	[0 180 180]	[9 14 2]	3
XUPGOG	SAHYOQ04	[49 49 49]	[48 48 48]	2.9224	887.218	887.218	887.218	60	60	60	43	-4.677	[0 180 180]	[9 14 2]	3
XUPGOG	SAHYOQ05	[49 49 49]	[48 48 48]	2.9224	887.218	887.218	887.218	60	60	60	61	-4.747	[0 0 0]	[17 13 7]	3
XUPGOG	UNIGEE	[1 1 1]	[1 1 1]	0.5936	18.1065	18.1065	18.1065	60	60	60	46	-4.776	[0 180 180]	[19 11 10]	3
XUPGOG	VAZTOG	[49 49 49]	[48 48 48]	2.9886	887.218	887.218	887.218	60	60	60	34	-4.669	[0 180 180]	[9 14 2]	3
XUPGOG	VUSJUP	[1 1 1]	[1 1 1]	0.0967	18.1065	18.1065	18.1065	60	60	60	58	-2.993	[0 0 0]	[17 11 7]	3
XUPGOG	VUSKAW	[1 1 1]	[1 1 1]	2.3845	18.1065	18.1065	18.1065	60	60	60	56	-4.798	[0 0 0]	[3 0 0]	3
XUPGOG	VUSKEA	[1 1 1]	[1 1 1]	2.3845	18.1065	18.1065	18.1065	60	60	60	57	-4.794	[0 0 0]	[3 0 0]	3
XUPGOG	XUPGOG	[1 1 1]	[1 1 1]	0	18.1065	18.1065	18.1065	60	60	60	77	-4.81	[0 0 0]	[9 14 2]	4
YURJUR	YURJUR	[1 1 1]	[1 1 1]	0	17.5757	17.5757	17.5757	90.9296	90.9296	90.9296	41	-6.065	[90 180 0]	[3 3 2]	4
ZARLEL	ZARLEL	[1 1 1]	[1 1 1]	0	20.269	20.269	39.645	90	90	90	16	-2.759	[0 0 0]	[7 13 8]	4
ZELROZ	ZELROZ	[1 1 1]	[1 1 1]	0	17.1227	17.1227	17.1227	90	90	90	5414	-2.547	[0 180 270]	[13 15 15]	4

## Sheet: Hetero-IP Candidates
CCDC REFCODE		Supercell Generation			Supercell Parameters						Simulation Results			Energy Density
MOF 1	MOF 2	LCM1	LCM2	Distortion	a	b	c	alpha	beta	gamma	N. Structures	Rotation	Translation	MOF1 - MOF2	MOF1 - MOF1	MOF2 - MOF2
AXUBAW	NODTIL	[1 1 1]	[1 1 1]	1.1072	18.1115	18.1115	18.1115	60	60	60	1	[0 0 0]	[20 20 14]	-1.626	- - -	-5.122
BAZGAM	SEMNIJ	[1 1 1]	[1 1 1]	1.7241	48.3033	48.3033	48.3033	60	60	60	109	[0 0 0]	[49 22 16]	-0.842	-0.42	-0.971
HABQUY	VEBHUG	[45 45 45]	[22 22 22]	2.7216	1301.37	1301.37	1301.37	90	90	90	19445	[90 180 90]	[58 43 43]	-2.712	- - -	-3.852
HABRAF	HANHAH	[1 1 1]	[2 2 2]	0.8743	37.2914	37.2914	37.2914	60	60	60	29	[0 0 0]	[24 14 5]	-8.628	- - -	- - -
HABRAF	XADDIR	[1 1 1]	[2 2 2]	0.2717	37.2914	37.2914	37.2914	60	60	60	21	[0 0 0]	[28 12 18]	-6.914	- - -	- - -
IZEPAF	WUHDAG	[43 43 43]	[42 42 42]	2.8926	1226.36	1226.36	1226.36	90	90	90	56	[0 90 90]	[14 24 28]	-2.885	- - -	-1.023
JUTCUW	PIYZAZ	[1 1 1]	[1 1 1]	1.9544	8.9364	8.9364	8.9364	60	60	60	32	[0 180 180]	[11 9 6]	-7.556	-6.648	-8.325
KOZQEX	WUHCUZ	[1 1 1]	[1 1 1]	0.7444	27.86	27.86	27.86	90	90	90	55	[90 180 270]	[11 15 27]	-2.055	-3.212	-1.632
LEHXUT	XAMDUM02	[1 1 1]	[2 2 2]	0.1275	37.1634	37.1634	37.1634	60	60	60	109	[0 0 0]	[28 31 13]	-4.769	- - -	- - -
LURRIA	MIBQAR06	[1 1 1]	[2 2 2]	0.1149	36.5362	36.5362	36.5362	60	60	60	263	[0 0 0]	[27 26 5]	-4.65	- - -	-4.642
PEVPUD	XAMDUM04	[1 1 1]	[1 1 1]	2.3791	18.2016	18.2016	18.2016	60	60	60	1	[0 0 0]	[27 10 8]	-6.356	-4.244	- - -
PIBNUK	PIBPIA	[43 43 43]	[42 42 42]	2.8962	1102.58	1102.58	1102.58	90	90	90	3102	[0 180 0]	[16 19 3]	-1.313	- - -	- - -
TEQPEM	VEBHUG	[1 1 1]	[3 3 1]	0.1337	20.627	20.627	20.627	60	60	60	72	[0 180 0]	[0 0 0]	-2.593	- - -	- - -
TOVGAO	JOZWIG02	[1 1 1]	[1 1 1]	0.1516	25.3468	25.3468	25.3468	90	90	90	88	[90 0 90]	[21 1 12]	-2.817	-2.591	-2.887
UQOFOX	VEHJUP	[23 1 1]	[22 1 1]	1.5778	457.815	20.55	20.55	90	90	90	17	[0 0 180]	[10 19 10]	-5.348	- - -	- - -
VETSUK	HEXVEM	[1 1 1]	[1 1 1]	1.2227	35.2288	35.2288	35.2288	60	60	60	15	[0 0 0]	[27 26 7]	-1.983	- - -	-0.895
VETTAR	HEXVEM	[1 1 1]	[1 1 1]	0.7567	35.1743	35.1743	35.1743	60	60	60	17	[0 0 0]	[27 26 7]	-1.958	- - -	-0.895
RUTNOK	VEJHEZ	[1 1 1]	[1 1 1]	0.7355	42.9245	42.9245	42.9245	90	90	90	319	[0 270 0]	[21 32 0]	-6.206	-2.457	- - -

## Sheet: Experimental Synthesis
CCDC REFCODE	Publication name	Metal	Linker	Solvent	Temperature	Yield	Space group	Net	Crystal system	Homo Interpenetration		Void Fraction
AXUBAW	IRMOF-18	Zn(NO3)2 · 6H2O	TMBDC	DMF	343 K	0.77	Fm-3m		Cubic	No		0.615291
BAZGAM	MOF-399	Cu(NO3)2 . 2.5H2O	BBC	DMF/NMP	358 K	0.26	Fm-3m	tbo	Cubic	Yes	-0.42	0.956878
HABQUY	PCN-610	Cu(NO3)2 . 2.5H2O	TTEI	DMF / HBF4	348 K	0.47	Fm-3m	(3,24)	Cubic	No		0.897162
HABRAF	PCN-68	Cu(NO3)2 . 2.5H2O	PTEI	DMF / HBF4	348 K	0.63	Fm-3m		Cubic	No		0.868212
HANHAH	ZnBTC	Zn(NO3)2 · 6H2O	BTC				Fm-3m		Cubic	No		0.741156
HEXVEM	mesoMOF-1	Cu(NO3)2 . 2.5H2O	TATAB	DMF	368 K		Fm-3		Cubic	Yes	-0.895	0.91978
IZEPAF	MIL-hypo-1	Cr	BDC				Pm-3m		Cubic	No		0.784093
JOZWIG02	NU-1102	ZrCl4	Por-PP	DEF	393 K		Pm-3m		Cubic	Yes	-2.887	0.792669
JUTCUW	Cd(CN)2	Cd	CN				Fd3m		Cubic	Yes	-6.648	0.513023
KOZQEX	DUT-75	Cu(NO3)2·3H2O	CPCDC	DMF / EtOH	353 K		Pm-3m		Cubic	Yes	-3.212	0.86899
LEHXUT	1	Cu(NO3)2·3H2O	BTB	DMF / HNO3	338 K		Fm 3 m	rht (3,24)	Cubic	No		0.857395
LURRIA	NOTT-116 (PCN-68)	Cu(NO3)2 . 2.5H2O	PTEI	DMF HBF4	348 K		Fm-3m	rht	Cubic	No		0.895902
MIBQAR06	IRMOF-1	Zn(NO3)2 · 6H2O	BDC				Fm-3m		Cubic	Yes	-4.642	0.799828
NODTIL	IRMOF-1	Zn(NO3)2 · 6H2O	BDC				Fm-3m		Cubic	Yes	-5.122	0.797657
PEVPUD	IRMOF-1	Zn(NO3)2 · 6H2O	BDC				Fm-3m		Cubic	Yes	-4.244	0.819391
PEVQAK	IRMOF-1	Zn(NO3)2 · 6H2O	BDC				Fm-3m		Cubic	Yes	-4.262	0.812312
PIBNUK	1	Zn(NO3)2 . 6H2O	TATB	DMF	363 K	0.6	P4132		Cubic	No		0.836271
PIBPIA	2	Cd(NO3)2 . 4H2O	TATB	DMF	393 K	0.64	P4332		Cubic	No		0.833367
PIYZAZ	Cd(C2)2	Cd	CC				Fd-3m		Cubic	Yes	-8.325	0.524758
RUTNOK	IRMOF-76	Zn(BF4)2 . xH2O	L0	DMF / KPF6	373 K		Fm-3m		Cubic	Yes	-2.457	0.883
SEMNIJ	NU-110	Cu(NO3)2 . 2.5H2O	NU-110L	DMF / EtOH / HCl	348 K	0.45	Fm-3m		Cubic	Yes	-0.971	0.933655
TEQPEM	IFMC-28	Zn(NO3)2 . 6H2O	DMTDC	DEF	373 K		Fm-3m		Cubic	No		0.790144
TOVGAO	PCN-228	ZrCl4	TCP-1	DMF	393 K	0.85	Pm-3m		Cubic	Yes	-2.591	0.789158
UQOFOX	PCN-528	MnCl2.2H2O	TTPP	DMF, Methanol	338 K	0.52	P4/mmm		Tetragonal	No		0.839272
VEBHUG	IRMOF-20	Zn(NO3)2 · 4H2O	TTDC	DMF	373 K		Fm-3m		Cubic	Yes	-3.852	0.890641
VEHJOJ	2	Zn(NO3)2.6H2O	BTC	DEE		0.56	Pmm		Cubic	No		0.819011
VEHJUP	3	Zn(NO3)2.6H2O	BTC	DEP	393 K	0.65	Pmm	tfe	Cubic	No		0.816202
VEJHEZ	MMPF-4	Zn(NO3)2 . 6H2O	TDCPP	DMSO	408 K	0.55	I a -3		Cubic	No		0.809035
VETSUK	POST-65(Co)	Mn -> Co metal-ion ex	HMTB	DMF/MeOH			Fm-3c		Cubic	No		0.756808
VETTAR	POST-65(Ni)	Mn -> Ni metal-ion ex	HMTT	DMF/MeOH			Fm-3c		Cubic	No		0.766131
WUHCUZ	NU-1103	ZrOCl 2 ·8H 2 O	Py-PTP				Pm-3m	ftw	Cubic	Yes	-1.632	0.837375
WUHDAG	NU-1104	ZrOCl 2 ·8H 2 O	Por-PTP	DMF	353 K		Pm-3m	ftw	Cubic	Yes	-1.023	0.840234
XADDIR	CuBTC	Cu(NO3)2 . 2.5H2O	BTC				Fm-3m		Cubic	No		0.737652
XAMDUM02	CuBTC	Cu(NO3)2 . 2.5H2O	BTC				Fm-3m		Cubic	No		0.759469
XAMDUM04	CuBTC	Cu(NO3)2 . 2.5H2O	BTC				Fm-3m		Cubic	No		0.737784

## Sheet: Force Field Parameters
Atom	σ (Å)	ε/kB (K)
C	3.43085	52.8734
Cd	2.53728	114.811
Co	2.55866	7.04978
Cu	3.11369	2.51778
H	2.57113	22.1565
Mg	2.69141	55.8947
Mn	2.63795	6.54623
N	3.26069	34.7453
Ni	2.52481	7.55334
O	3.11815	30.2133
Zn	2.46155	62.4409
Dummy	3	30
Force field parameters used in this study
V(r) in K.kB units (0.0083144621 kJ/mol) (r: distance between atoms in Å)

## Sheet: Algorithm Parameters
Parameter	Value
atom_energy_limit	100000000
check_extension	true
core_database	true
core_limit	1000000
cut_off	12
directory_separation	true
energy_density_limit	0.1
energy_map_atom_list	qnd
energy_map_type	numpy
export_format	cif
export_packed	false
export_packed_color	false
export_pbc	true
export_single	true
export_single_color	true
export_structures	20
export_summary	true
ext_cut_off	50
force_field	uff
grid_size	1
report_structures	20
rotation_freedom	90
rotation_limit	20
self_interpenetration	true
structure_energy_limit	100000000
summary_percent	5
try_all_rotations	true
More information on parameters are given in Supplementary Information
To see these parameters in use go to github.com/kbsezginel/IPMOF
